# Supplementary material for: Genomic analysis reveals epistatic silencing of “expensive” genes in Escherichia coli K-12
Source: Royal Society of Chemistry journal article supplement (doi:10.1039/c3mb70035f), 2013-04-16
Supplement: c3mb70035f.xlsx [file c3mb70035f.xlsx]

## Sheet: Epistatic
Epistatic genes
ORF	Synonym	Start	End	Direction	Annotation
b0014	dnaK	12163	14079	forward	chaperone Hsp70; DNA biosynthesis; autoregulated heat shock proteins
b0041	fixA	42403	43173	forward	probable flavoprotein subunit required for anaerobic carnitine metabolism
b0042	fixB	43188	44129	forward	probable flavoprotein subunit required for anaerobic carnitine metabolism
b0043	fixC	44180	45466	forward	flavoprotein (electron transport), possibly involved in anaerobic carnitine metabolism
b0044	fixX	45463	45750	forward	putative ferredoxin possibly involved in anaerobic carnitine metabolism
b0045	yaaU	45807	47138	forward	YaaU
b0115	aceF	125695	127587	forward	AceF
b0139	htrE	152829	155426	reverse	putative outer membrane usher protein
b0140	ecpD	155461	156201	reverse	probable pilin chaperone similar to PapD
b0141	yadN	156299	156883	reverse	predicted fimbrial-like adhesin protein
b0217	yafT	237335	238120	forward	predicted aminopeptidase
b4586	ykfM	238257	238736	reverse	hypothetical protein
b0218	yafU	238746	239084	reverse	predicted inner membrane protein
b0291	yagX	306031	308556	reverse	predicted aromatic compound dioxygenase
b0292	matC	308582	309250	reverse	predicted protein
b0293	matB	309308	309895	reverse	conserved fimbrillin
b0301	ykgB	316950	317543	reverse	conserved inner membrane protein
b0310	ykgH	323920	324588	reverse	predicted inner membrane protein
b0319	yahE	335149	336012	forward	predicted protein
b0320	yahF	336002	337549	forward	predicted acyl-CoA synthetase with NAD(P)-binding domain and succinyl-CoA synthetase domain
b0321	yahG	337549	338967	forward	conserved protein
b0323	yahI	339389	340339	forward	predicted carbamate kinase-like protein
b0324	yahJ	340349	341731	forward	predicted deaminase with metallo-dependent hydrolase domain
b0362	yaiF	381728	382114	reverse	predicted protein
b0363	yaiP	381963	383159	reverse	predicted glucosyltransferase
b0364	yaiS	383283	383840	reverse	conserved protein
b0365	tauA	384456	385418	forward	TauA
b0366	tauB	385431	386198	forward	TauB
b0367	tauC	386195	387022	forward	TauC
b0368	tauD	387019	387870	forward	taurine dioxygenase monomer
b0411	tsx	430353	431237	reverse	nucleoside channel; receptor of phage T6 and colicin K
b0428	cyoE	446039	446929	reverse	heme O synthase
b0473	htpG	494344	496218	forward	HtpG monomer
b0497	rhsD	522485	526765	forward	RhsD protein in rhs element
b0498	ybbC	526805	527173	forward	predicted protein
b0499	ylbH	527173	527883	forward	conserved protein, rhs-like
b0500	ybbD	527864	528124	forward	predicted protein
b0502	ylbG	528869	529240	reverse	predicted DNA-binding transcriptional regulator
b0511	ybbW	536857	538311	forward	YbbW NCS1 Transporter
b0512	allB	538371	539732	forward	allantoinase monomer
b0513	ybbY	539789	541090	forward	predicted uracil/xanthine transporter
b0514	glxK	541112	542257	forward	glycerate kinase II
b0515	allE	542485	543270	reverse	<i>S</i>-ureidoglycine aminohydrolase
b0516	allC	543281	544516	reverse	allantoate amidohydrolase monomer
b0517	allD	544538	545587	reverse	ureidoglycolate dehydrogenase
b0518	fdrA	545904	547571	forward	involved in protein transport; multicopy suppressor of dominant negative ftsH mutants
b0520	ylbF	548850	549665	forward	conserved protein
b0521	ybcF	549662	550555	forward	predicted carbamate kinase
b0530	sfmA	557435	557977	forward	predicted fimbrial-like adhesin protein
b0531	sfmC	558197	558889	forward	predicted pilin chaperone, periplasmic
b0532	sfmD	558920	561523	forward	predicted outer membrane export usher protein
b0533	sfmH	561565	562542	forward	predicted fimbrial-like adhesin protein
b0534	sfmF	562553	563068	forward	predicted fimbrial-like adhesin protein
b0535	fimZ	563071	563703	reverse	FimZ transcriptional regulator
b0544	ybcK	568125	569651	forward	DLP12 prophage; predicted recombinase
b0545	ybcL	570116	570667	forward	DLP12 prophage; predicted kinase inhibitor
b0601	ybdM	633970	634599	reverse	conserved protein
b0602	ybdN	634572	635792	reverse	conserved protein
b0603	ybdO	635939	636841	reverse	predicted DNA-binding transcriptional regulator LYSR-type
b0618	citC	650021	651079	reverse	citrate lyase synthetase
b0648	ybeU	678731	679438	forward	predicted tRNA ligase
b0700	rhsC	728806	732999	forward	RhsC protein in rhs element
b0702	ybfB	732999	733325	forward	predicted inner membrane protein
b0704	ybfC	734873	735442	forward	predicted protein
b4514	ybfQ	735668	735922	forward	predicted transposase
b0705	ybfL	736123	737184	forward	predicted transposase; receptor protein
b0706	ybfD	737315	738076	forward	putative DNA ligase
b0718	ybgQ	748945	751392	reverse	predicted outer membrane usher protein
b0719	ybgD	751452	752018	reverse	predicted fimbrial-like adhesin protein
b0755	gpmA	786066	786818	reverse	2,3-bisphosphoglycerate-dependent phosphoglycerate mutase monomer
b0769	ybhH	799982	801034	forward	conserved protein
b0770	ybhI	801110	802543	forward	YbhI DASS Transporter
b0814	ompX	849673	850188	forward	outer membrane protein X
b0872	hcr	910405	911373	reverse	NADH oxidoreductase
b0873	hcp	911385	913037	reverse	hybrid-cluster protein
b0938	elfA	997091	997630	forward	fimbrial-like adhesin protein
b0939	elfD	997713	998414	forward	predicted periplasmic pilin chaperone
b0940	elfC	998439	1001039	forward	predicted outer membrane usher protein
b0941	elfG	1001030	1002100	forward	predicted fimbrial-like adhesin protein
b0942	ycbU	1002112	1002654	forward	predicted fimbrial-like adhesin protein
b0943	ycbV	1002662	1003177	forward	predicted fimbrial-like adhesin protein
b0944	ycbF	1003170	1003880	forward	predicted periplasmic pilin chaperone
b0978	appC	1036963	1038507	forward	cytochrome <i>bd</i>-II terminal oxidase subunit I
b0979	appB	1038519	1039655	forward	cytochrome <i>bd</i>-II terminal oxidase subunit II
b4592	yccB	1039668	1039760	forward	small outer membrane protein
b0980	appA	1039840	1041138	forward	AppA
b0981	etk	1041253	1043433	reverse	autophosphorylating protein tyrosine kinase
b0992	yccM	1051512	1052585	reverse	predicted 4Fe-4S membrane protein
b1001	yccE	1063259	1064515	forward	predicted protein
b1056	yceI	1117124	1117699	reverse	predicted protein
b1113	ycfS	1168635	1169597	reverse	L,D-transpeptidase YcfS
b1137	ymfD	1196090	1196755	reverse	e14 prophage; predicted SAM-dependent methyltransferase
b1138	ymfE	1196756	1197460	reverse	e14 prophage; predicted inner membrane protein
b1139	lit	1197918	1198811	forward	Lit, cell death peptidase; phage exclusion; e14 prophage
b1160	iraM	1210903	1211226	reverse	inhibitor of &sigma;<sup>S</sup> proteolysis
b1161	ycgX	1211926	1212330	reverse	predicted protein
b1167	ymgC	1215971	1216219	forward	protein involved in biofilm formation
b1221	narL	1274402	1275052	reverse	NarL
b1222	narX	1275045	1276841	reverse	NarX
b1223	narK	1277180	1278571	forward	NarK MFS nitrate/nitrite antiporter
b1224	narG	1279087	1282830	forward	nitrate reductase A, &alpha; subunit
b1225	narH	1282827	1284365	forward	nitrate reductase A, &beta; subunit
b1226	narJ	1284362	1285072	forward	molybdenum cofactor assembly chaperone subunit (&delta; subunit) of nitrate reductase 1
b1227	narI	1285072	1285749	forward	nitrate reductase A, &gamma; subunit
b1258	yciF	1313294	1313794	reverse	putative structural protein
b1259	yciG	1313880	1314059	reverse	predicted protein
b1377	ompN	1433784	1434917	reverse	outer membrane pore protein N, non-specific
b1407	ydbD	1473168	1475474	forward	protein involved in detoxification of methylglyoxal
b1423	ydcJ	1493312	1494655	forward	conserved protein
b1440	ydcS	1509678	1510823	forward	YdcS
b1441	ydcT	1510841	1511854	forward	YdcT
b1454	yncG	1524271	1524888	forward	predicted enzyme
b1457	ydcD	1527946	1528428	forward	hypothetical protein
b1458	yncI	1528610	1529356	forward	predicted protein
b1459	yncM	1529400	1529600	forward	predicted protein
b1460	ydcC	1529840	1530976	forward	conserved protein
b1461	pptA	1531076	1531309	forward	probable 4-oxalocrotonate tautomerase (4-OT) monomer
b1462	yddH	1531306	1531875	reverse	conserved protein
b1465	narV	1533961	1534641	reverse	nitrate reductase Z, &gamma; subunit
b1466	narW	1534638	1535333	reverse	NarW, probable private chaperone for NarZ nitrate reductase subunit
b1467	narY	1535333	1536877	reverse	nitrate reductase Z, &beta; subunit
b1468	narZ	1536874	1540614	reverse	nitrate reductase Z, &alpha; subunit
b1470	yddJ	1542408	1542743	reverse	hypothetical protein
b1471	yddK	1542782	1543738	reverse	predicted protein
b1472	yddL	1543762	1544052	reverse	predicted lipoprotein
b1473	yddG	1544312	1545193	reverse	aromatic amino acid exporter
b1474	fdnG	1545425	1548472	forward	formate dehydrogenase N, &alpha; subunit
b1475	fdnH	1548485	1549369	forward	formate dehydrogenase N, &beta; subunit
b1478	adhP	1550852	1551862	reverse	ethanol dehydrogenase
b1479	maeA	1551996	1553693	reverse	malate dehydrogenase, NAD-requiring
b1483	ddpF	1555136	1556062	reverse	YddO
b1501	ydeP	1582231	1584510	reverse	acid resistance protein
b1509	ydeU	1590689	1592089	reverse	conserved protein
b1510	ydeK	1592133	1596110	reverse	predicted lipoprotein
b1526	yneJ	1612828	1613709	forward	predicted DNA-binding transcriptional regulator, LysR-type
b1597	asr	1669400	1669708	forward	acid shock protein
b1694	ydiF	1773611	1775206	forward	fused predicted acetyl-CoA:acetoacetyl-CoA transferase: &alpha; subunit/&beta; subunit
b1695	ydiO	1775220	1776371	forward	predicted acyl-CoA dehydrogenase
b1729	ydjN	1808958	1810349	forward	predicted transporter
b1730	ydjO	1810353	1811168	reverse	predicted protein
b1732	katE	1811891	1814152	forward	KatE
b1743	spy	1823164	1823649	reverse
b1779	gapA	1860795	1861790	forward	glyceraldehyde 3-phosphate dehydrogenase-A monomer
b1817	manX	1900072	1901043	forward
b1818	manY	1901106	1901906	forward	ManY
b1932	yedL	2008624	2009103	forward	predicted acyltransferase
b1935	yedM	2010025	2010375	reverse	conserved protein
b1937	fliE	2010724	2011038	reverse	flagellar basal-body protein FliE
b1938	fliF	2011253	2012911	forward	flagellar M-ring protein FliF; basal-body MS(membrane and supramembrane)-ring and collar protein
b1962	yedJ	2030408	2031103	reverse	predicted phosphohydrolase
b1963	yedR	2031143	2031508	reverse	predicted inner membrane protein
b2012	yeeD	2082250	2082477	reverse	conserved protein
b2013	yeeE	2082491	2083549	reverse	putative transport system permease protein
b2033	wbbJ	2102518	2103108	reverse	predicted acyl transferase
b2034	wbbI	2103089	2104081	reverse	&beta;-1,6-galactofuranosyltransferase
b2035	rfc	2104084	2105250	reverse	O-antigen polymerase
b2043	wcaM	2112526	2113920	reverse	predicted colanic acid biosynthesis protein
b2044	wcaL	2113931	2115151	reverse	predicted colanic biosynthesis glycosyl transferase
b2045	wcaK	2115148	2116428	reverse	predicted colanic acid biosynthesis pyruvyl transferase
b2046	wzxC	2116704	2118182	reverse	WzxC
b2047	wcaJ	2118184	2119578	reverse	predicted colanic acid biosynthsis UDP-glucose lipid carrier transferase
b2048	cpsG	2119633	2121003	reverse	phosphomannomutase
b2049	cpsB	2121108	2122544	reverse	mannose-1-phosphate guanylyltransferase
b2050	wcaI	2122547	2123770	reverse	predicted colanic biosynthesis glycosyl transferase
b2051	gmm	2123767	2124246	reverse
b2052	fcl	2124249	2125214	reverse
b2053	gmd	2125217	2126338	reverse	GDP-mannose 4,6-dehydratase
b2054	wcaF	2126364	2126912	reverse	predicted acyl transferase
b2055	wcaE	2126928	2127674	reverse	predicted colanic acid biosynthesis glycosyl transferase
b2056	wcaD	2127685	2128902	reverse	predicted colanic acid polymerase
b2057	wcaC	2128877	2130094	reverse	predicted colanic acid biosynthesis glycosyl transferase
b2058	wcaB	2130091	2130579	reverse	predicted colanic acid biosynthesis acyl transferase
b2059	wcaA	2130582	2131421	reverse	predicted colanic acid biosynthesis glycosyl transferase
b2060	wzc	2131514	2133676	reverse	tyrosine kinase involved in colanic acid biosynthesis
b2061	wzb	2133679	2134122	reverse	tyrosine phosphatase
b2062	wza	2134128	2135267	reverse	lipoprotein required for capsular polysaccharide translocation through the outer membrane
b2070	yegI	2147063	2149009	reverse	conserved protein
b2082	ogrK	2165326	2165544	reverse	DNA-binding transcriptional regulator, prophage P2 remnant
b2108	yehA	2185402	2186436	reverse	putative type-1 fimbrial protein
b2109	yehB	2186452	2188932	reverse	putative outer membrane usher protein
b2110	yehC	2188948	2189667	reverse	putative fimbrial chaperone
b2111	yehD	2189702	2190244	reverse	predicted fimbrial-like adhesin protein
b2143	cdd	2229866	2230750	forward	Cdd
b2167	fruA	2257741	2259432	reverse	FruA
b2168	fruK	2259449	2260387	reverse	1-phosphofructokinase monomer
b2169	fruB	2260387	2261517	reverse	FruB
b2203	napB	2296291	2296740	reverse	small subunit of periplasmic nitrate reductase, cytochrome c<SUB>550</SUB> protein
b2204	napH	2296737	2297600	reverse	ferredoxin-type protein
b2205	napG	2297587	2298282	reverse	ferredoxin-type protein
b2206	napA	2298289	2300775	reverse	large subunit of periplasmic nitrate reductase, molybdoprotein
b2207	napD	2300772	2301035	reverse	signal peptide-binding chaperone for NapA
b2208	napF	2301025	2301519	reverse	ferredoxin-type protein
b2233	yfaL	2338439	2342191	reverse	adhesin
b2239	glpQ	2347957	2349033	reverse	GlpQ
b2240	glpT	2349038	2350396	reverse	GlpT glycerol-3-P MFS transporter
b2241	glpA	2350669	2352297	forward	glycerol-3-phosphate dehydrogenase (anaerobic), large subunit
b2242	glpB	2352287	2353546	forward	glycerol-3-phosphate dehydrogenase (anaerobic), membrane anchor subunit
b2243	glpC	2353543	2354733	forward	glycerol-3-phosphate dehydrogenase (anaerobic), small subunit
b2254	arnC	2365093	2366061	forward	undecaprenyl phosphate-L-Ara4FN transferase
b2255	arnA	2366061	2368043	forward	fused UDP-L-Ara4N formyltransferase and UDP-GlcA C-4''-decarboxylase
b2256	arnD	2368040	2368930	forward	conserved protein
b2257	arnT	2368930	2370582	forward	4-amino-4-deoxy-L-arabinose (L-Ara4N) transferase
b2268	rbn	2379630	2380547	forward	Rbn
b2269	elaD	2380735	2381946	forward	deubiquitinase
b2270	yfbK	2382017	2383744	reverse	putative lipoprotein
b2271	yfbL	2383882	2384853	forward	predicted peptidase
b2272	yfbM	2384956	2385459	forward	predicted protein
b2338	yfcU	2451287	2453023	reverse	fimbrial usher protein, N-terminal fragment
b2339	yfcV	2453105	2453668	reverse	predicted fimbrial-like adhesin protein
b2344	fadL	2459322	2460668	forward	long-chain fatty acid outer membrane transporter; sensitivity to phage T2
b2345	yfdF	2461034	2462092	forward	predicted protein
b2352	yfdI	2467153	2468484	forward	CPS-53 (KpLE1) prophage; predicted inner membrane protein
b2353	tfaS	2468825	2469127	forward	CPS-53 (KpLE1) prophage; tail fiber assembly protein fragment
b2371	yfdE	2486045	2487190	reverse	predicted CoA transferase, NAD(P)-binding
b2372	yfdV	2487264	2488208	reverse	YfdV AEC Transporter
b2373	oxc	2488278	2489972	reverse	oxalyl-CoA decarboxylase
b2374	frc	2490026	2491276	reverse	formyl-CoA transferase monomer
b2375	yfdX	2491789	2492424	reverse	predicted protein
b2389	yfeO	2507652	2508908	forward	predicted ion channel protein
b2414	cysK	2530431	2531402	forward	CysK
b2422	cysA	2537739	2538836	reverse	CysA
b2423	cysW	2538826	2539701	reverse	CysW
b2424	cysU	2539701	2540534	reverse	CysU
b2425	cysP	2540534	2541550	reverse	CysP
b2465	tktB	2577658	2579661	forward
b2503	yfgF	2624717	2626960	reverse	cyclic di-GMP phosphodiesterase
b2505	yfgH	2627814	2628332	forward	predicted outer membrane lipoprotein
b2552	hmp	2683857	2685047	forward	fused nitric oxide dioxygenase and dihydropteridine reductase 2
b2625	yfjI	2757007	2758416	forward	CP4-57 prophage; predicted protein
b2626	yfjJ	2758569	2759195	forward	CP4-57 prophage; predicted protein
b2641	ypjM_1	2770998	2771180	reverse	CP4-57 prophage; predicted protein
b2642	yfjW	2771340	2773043	forward	CP4-57 prophage; predicted inner membrane protein
b2649	ypjB	2781660	2782451	reverse	predicted protein
b2650	ypjC	2782551	2783033	reverse	predicted protein
b2651	b2651	2783243	2783374	forward
b4462	ygaQ_2	2784770	2785456	forward	predicted protein
b2660	lhgO	2788004	2789272	forward	L-2-hydroxyglutarate oxidase
b2661	gabD	2789295	2790743	forward
b2662	gabT	2790757	2792037	forward	4-aminobutyrate aminotransferase monomer
b2679	proX	2805154	2806146	forward	ProX
b2687	luxS	2812240	2812755	reverse	<i>S</i>-ribosylhomocysteine lyase
b2703	srlE	2824414	2825373	forward	glucitol/sorbitol-specific enzyme IIB component of PTS
b2705	srlD	2825759	2826538	forward	SrlD
b2762	cysH	2885600	2886334	reverse	CysH
b2763	cysI	2886409	2888121	reverse	sulfite reductase, hemoprotein subunit
b2764	cysJ	2888121	2889920	reverse	sulfite reductase, flavoprotein subunit
b4463	ygcU	2895986	2897440	reverse	predicted FAD-containing dehydrogenase
b2774	ygcW	2897510	2898295	reverse	predicted deoxygluconate dehydrogenase
b2777	ygcF	2902769	2903440	reverse	conserved protein
b2845	yqeG	2983869	2985098	forward	YqeG STP transporter
b4683	yqeL	2987841	2987921	reverse	small protein
b2849	yqeK	2987957	2988382	reverse	predicted protein
b2850	ygeF	2988576	2989022	forward	predicted protein
b2851	ygeG	2989290	2989781	forward	predicted chaperone
b2852	ygeH	2990116	2991492	forward	predicted transcriptional regulator
b2853	ygeI	2991660	2991878	forward	predicted protein
b2855	ygeK	2992482	2992925	reverse	predicted DNA-binding transcriptional regulator
b2856	ygeL	2992959	2993114	reverse	predicted protein
b2857	ygeM	2993336	2993767	reverse	predicted protein
b2984	yghR	3130476	3131234	reverse	predicted protein with nucleoside triphosphate hydrolase domain
b2985	yghS	3131266	3131979	reverse	predicted protein with nucleoside triphosphate hydrolase domain
b2986	yghT	3132153	3132845	forward	predicted protein with nucleoside triphosphate hydrolase domain
b2987	pitB	3132894	3134393	reverse	phosphate transporter
b3043	ygiL	3183436	3183987	forward	predicted fimbrial-like adhesin protein
b3050	yqiJ	3190230	3190859	forward	putative oxidoreductase
b3120	yhaB	3265876	3266415	forward	predicted protein
b3121	yhaC	3266437	3267624	forward	predicted protein
b3141	agaI	3284292	3285047	forward	predicted galactosamine-6-phosphate isomerase
b3142	yraH	3285448	3286032	forward	predicted fimbrial-like adhesin protein
b3143	yraI	3286112	3286807	forward	predicted pilin chaperone
b3144	yraJ	3286836	3289352	forward	predicted outer membrane export usher protein
b3213	gltD	3357220	3358638	forward	glutamate synthase, small subunit
b3214	gltF	3359198	3359962	forward	periplasmic protein
b3215	yhcA	3360134	3360808	forward	predicted periplasmic chaperone protein
b3216	yhcD	3360829	3363210	forward	predicted outer membrane protein
b3264	envR	3410825	3411487	reverse	EnvR DNA-binding transcriptional repressor
b3265	acrE	3411886	3413043	forward	transmembrane protein affects septum formation and cell membrane permeability
b3266	acrF	3413055	3416159	forward	AcrF
b3268	yhdW	3417171	3418088	forward	YhdW
b3365	nirB	3492033	3494576	forward	nitrite reductase, large subunit
b3366	nirD	3494573	3494899	forward	nitrite reductase, small subunit
b3426	glpD	3560036	3561541	forward	GlpD
b3442	yhhZ	3579886	3581064	forward	conserved protein
b4612	yrhD	3582427	3582582	forward	hypothetical protein
b3446	yrhB	3582782	3583066	forward	predicted protein
b3469	zntA	3604474	3606672	forward	zinc, cadmium and lead efflux system
b3476	nikA	3611690	3613264	forward	NikA
b3477	nikB	3613264	3614208	forward	NikB
b3478	nikC	3614205	3615038	forward	NikC
b3479	nikD	3615038	3615802	forward	NikD
b3480	nikE	3615799	3616605	forward	NikE
b3482	rhsB	3617215	3621450	forward	RhsB protein in rhs element
b3483	yhhH	3621422	3621805	forward	predicted protein
b3484	yhhI	3622401	3623537	forward	predicted transposase
b3488	yhiJ	3628991	3630613	reverse	predicted protein
b3490	yhiL	3631243	3632481	reverse	predicted protein
b3491	yhiM	3632864	3633916	forward	conserved inner membrane protein
b3503	arsC	3648260	3648685	forward	arsenate reductase
b3504	yhiS_1	3649314	3650096	forward	predicted protein
b3583	sgbE	3748109	3748804	forward	L-ribulose-5-phosphate 4-epimerase
b3584	yiaT	3749151	3749891	reverse	putative outer membrane protein
b3585	yiaU	3750015	3750989	forward	predicted DNA-binding transcriptional regulator, LysR-type
b3586	yiaV	3750986	3752122	reverse	predicted membrane fusion protein (MFP) component of efflux pump, signal anchor
b3588	aldB	3752996	3754534	reverse
b3589	yiaY	3754699	3755850	reverse	predicted Fe-containing alcohol dehydrogenase
b3594	yibA	3764360	3765202	forward	predicted lyase containing HEAT-repeat
b3595	yibJ	3765244	3765945	forward	predicted Rhs-family protein
b3596	yibG	3766200	3766661	forward	conserved protein
b4615	yibV	3767368	3767703	forward	hypothetical protein
b3605	lldD	3777850	3779040	forward	L-lactate dehydrogenase
b3612	gpmM	3783283	3784827	forward	2,3-bisphosphoglycerate-independent phosphoglycerate mutase
b3623	waaK	3796262	3797335	reverse	lipopolysaccharide core biosynthesis; heptosyl transferase IV; probably hexose transferase
b3624	rfaZ	3797368	3798219	reverse	protein involved in KdoIII attachment during lipopolysaccharide core biosynthesis
b3625	waaY	3798290	3798988	reverse	lipopolysaccharide core heptose (II) kinase
b3626	waaJ	3799006	3800022	reverse	UDP-glucose:(glucosyl)LPS &alpha;-1,2-glucosyltransferase
b3627	waaI	3800062	3801081	reverse	UDP-D-glucose:(glucosyl)LPS &alpha;-1,3-glucosyltransferase
b3628	waaB	3801081	3802190	reverse	UDP-D-galactose:(glucosyl)lipopolysaccharide-1,6-D-galactosyltransferase
b3629	rfaS	3802204	3803139	reverse	lipopolysaccharide core biosynthesis protein
b3659	setC	3834976	3836160	forward	YicK MFS Transporter
b3889	yiiE	4077314	4077532	forward	predicted transcriptional regulator
b3890	yiiF	4077774	4077992	forward	conserved protein
b3896	yiiG	4085025	4086080	forward	conserved protein
b3908	sodA	4098833	4099453	forward	SodA
b3926	glpK	4113737	4115245	reverse	GlpK
b3927	glpF	4115268	4116113	reverse	GlpF
b3932	hslV	4119780	4120310	reverse	peptidase component of the HslVU protease
b4017	arpA	4218324	4220510	reverse	regulator of acetyl CoA synthetase
b4026	yjbE	4233929	4234171	forward	predicted protein
b4033	malF	4241554	4243098	reverse	MalF
b4034	malE	4243252	4244442	reverse	MalE
b4035	malK	4244807	4245922	forward	MalK
b4036	lamB	4245994	4247334	forward	LamB
b4037	malM	4247577	4248497	forward	maltose regulon periplasmic protein
b4038	yjbI	4248978	4250306	forward	conserved protein
b4047	yjbL	4258344	4258598	forward	predicted protein
b4048	yjbM	4258622	4259329	forward	predicted protein
b4049	dusA	4259692	4260729	forward	tRNA-dihydrouridine synthase A
b4621	yjbS	4266832	4267035	reverse	hypothetical protein
b4066	yjcF	4279806	4281098	reverse	conserved protein
b4084	alsK	4304893	4305822	reverse	D-allose kinase
b4085	alsE	4305806	4306501	reverse	allulose-6-phosphate 3-epimerase
b4088	alsB	4309130	4310065	reverse	AlsB
b4117	adiA	4336277	4338544	reverse	Adi
b4143	groL	4369048	4370694	forward	GroEL, chaperone Hsp60, peptide-dependent ATPase, heat shock protein
b4204	yjfZ	4424651	4425445	reverse	predicted protein
b4209	ytfE	4429344	4430006	reverse	protein involved in repair of stress-damaged iron-sulfur clusters
b4215	ytfI	4435730	4436668	forward	predicted protein
b4239	treC	4461077	4462732	reverse	trehalose-6-phosphate hydrolase
b4240	treB	4462782	4464203	reverse	TreB
b4253	yjgL	4473460	4475274	forward	predicted protein
b4254	argI	4475330	4476334	reverse	ArgI
b4256	yjgM	4477057	4477560	reverse	predicted acetyltransferase
b4257	yjgN	4477753	4478949	forward	conserved inner membrane protein
b4279	yjhB	4502081	4503298	forward	YjhB MFS transporter
b4280	yjhC	4503310	4504428	forward	KpLE2 phage-like element; predicted oxidoreductase
b4311	nanC	4536808	4537524	reverse	N-acetylneuraminic acid outer membrane channel
b4312	fimB	4538980	4539582	forward	regulator for fimA
b4325	yjiC	4553513	4554343	reverse	hypothetical protein
b4377	yjjU	4610434	4611507	forward	predicted esterase

## Sheet: Unilateral
Unilateral genes
ORF	Synonym	Start	End	Direction	Annotation
b0020	nhaR	18715	19620	forward	NhaR transcriptional activator
b0034	caiF	34300	34695	forward	CaiF
b0036	caiD	35377	36162	reverse	crotonobetainyl-CoA hydratase
b0037	caiC	36271	37824	reverse	carnitine-CoA ligase
b0038	caiB	37898	39115	reverse	CaiB monomer
b0040	caiT	40417	41931	reverse
b0056	yabP	58474	59124	forward	predicted protein
b0076	leuO	84368	85312	forward	LeuO DNA-binding transcriptional dual activator
b0135	yadC	149715	150953	reverse	predicted fimbrial-like adhesin protein
b0136	yadK	151003	151599	reverse	predicted fimbrial-like adhesin protein
b0137	yadL	151626	152231	reverse	hypothetical protein
b0138	yadM	152243	152812	reverse	predicted fimbrial-like adhesin protein
b0161	degP	180884	182308	forward	DegP
b0162	cdaR	182463	183620	forward	CdaR DNA-binding transcriptional activator
b0186	ldcC	209679	211820	forward	LdcC
b0220	ivy	240343	240816	forward	inhibitor of vertebrate C-type lysozyme
b0234	yafP	252709	253161	forward	predicted acyltransferase with acyl-CoA N-acyltransferase domain
b0241	phoE	258269	259324	reverse	PhoE
b0242	proB	259612	260715	forward	ProB
b0243	proA	260727	261980	forward	ProA
b0277	yagK	291546	292172	reverse	CP4-6 prophage; conserved protein
b0278	yagL	292444	293142	reverse	CP4-6 prophage; DNA-binding protein
b0279	yagM	293169	294023	reverse	CP4-6 prophage; predicted protein
b0287	yagU	302215	302829	forward	inner membrane protein that contributes to acid resistance
b0294	matA	309970	310560	reverse	predicted regulator
b4671	ykgR	312365	312466	reverse	small membrane protein
b0300	ykgA	315674	316360	reverse	predicted DNA-binding transcriptional regulator
b0303	ykgI	317555	317791	reverse	predicted protein
b0304	ykgC	317900	319225	reverse	predicted oxidoreductase with FAD/NAD(P)-binding domain and dimerization domain
b0306	ykgE	320832	321551	forward	predicted oxidoreductase
b0307	ykgF	321562	322989	forward	predicted amino acid dehydrogenase with NAD(P)-binding domain and ferridoxin-like domain
b0308	ykgG	322982	323677	forward	predicted transporter
b0309	b0309	323632	323844	reverse
b0315	yahA	331595	332683	forward	phosphodiesterase, c-di-GMP-specific
b0318	yahD	334504	335109	forward	predicted transcriptional regulator with ankyrin domain
b0325	yahK	342108	343157	forward	predicted oxidoreductase, Zn-dependent and NAD(P)-binding
b0326	yahL	343400	344215	forward	predicted protein
b0329	yahO	345708	345983	forward	predicted protein
b0343	lacY	361150	362403	reverse	LacY lactose MFS transporter
b0344	lacZ	362455	365529	reverse	&beta;-galactosidase monomer
b0371	yaiT	389475	390935	forward	predicted protein
b0375	yaiV	393685	394353	forward	predicted DNA-binding transcriptional regulator
b0382	iraP	400610	400870	forward	anti-adaptor protein for &sigma;<sup>S</sup> stabilization
b0383	phoA	400971	402386	forward	PhoA
b0392	ykiA	407833	408174	forward	predicted protein
b0419	yajO	436385	437359	reverse	putative NAD(P)H-dependent xylose reductase
b0459	maa	478591	479142	reverse	Maa
b0460	hha	479314	479532	reverse	haemolysin expression modulating protein
b0461	tomB	479558	479932	reverse	protein that modulates Hha toxicity
b0485	ybaS	510865	511797	forward	glutaminase
b0486	ybaT	511800	513092	forward	YbaT APC transporter
b0490	ybbL	515143	515820	forward	predicted transporter subunit: ATP-binding component of ABC superfamily
b0491	ybbM	515807	516586	forward	putative metal resistance protein
b0543	emrE	567538	567870	forward	EmrE SMR transporter
b0546	ybcM	570677	571474	forward	DLP12 prophage; predicted DNA-binding transcriptional regulator
b0557	borD	577823	578116	reverse	bacteriophage lambda Bor protein homolog
b0558	ybcV	578407	578817	reverse	DLP12 prophage; predicted protein
b0559	ybcW	579103	579309	forward	DLP12 prophage; predicted protein
b0564	appY	582904	583653	forward	AppY DNA-binding transcriptional activator
b0565	ompT	583903	584856	reverse	outer membrane protease VII (outer membrane protein 3b)
b0587	fepE	617477	618610	forward	ferric enterobactin (enterochelin) transport
b0605	ahpC	638168	638731	forward	AhpC component
b0612	citT	644340	645803	reverse	CitT citrate DASS Transporter
b0613	citG	645854	646732	reverse	triphosphoribosyl-dephospho-CoA synthase
b0614	citX	646707	647258	reverse	apo-citrate lyase phosphoribosyl-dephospho-CoA transferase
b0615	citF	647262	648794	reverse	citrate lyase, citrate-ACP transferase &alpha; subunit
b0616	citE	648805	649713	reverse	citrate lyase, citryl-ACP lyase &beta; subunit
b0617	citD	649710	650006	reverse	citrate lyase, acyl carrier &gamma; subunit
b0619	dpiB	651458	653116	forward	DpiB sensory histidine kinase
b0620	dpiA	653085	653765	forward	DpiA
b0621	dcuC	653806	655191	reverse	DcuC dicarboxylate transporter
b0622	pagP	655780	656340	forward	PagP monomer
b0629	ybeF	659648	660601	reverse	predicted DNA-binding transcriptional regulator, LYSR-type
b0645	ybeR	675934	676641	forward	predicted protein
b0646	djlB	676638	678065	forward	predicted chaperone
b0647	ybeT	678075	678629	reverse	conserved outer membrane protein
b0649	djlC	679435	680886	forward	Hsc56, co-chaperone of Hsc62
b0650	hscC	680946	682616	reverse	Hsc62, Hsp70 family chaperone, binds to RpoD and inhibits transcription
b0678	nagB	702034	702834	reverse	NagB
b0689	ybfP	714635	715129	forward	putative pectinase
b0692	potE	716169	717488	reverse	putrescine/proton symporter: putrescine/ornithine antiporter
b0693	speF	717485	719683	reverse	SpeF
b4590	ybfK	719806	720063	forward	hypothetical protein
b0707	ybgA	738224	738733	forward	conserved protein
b0708	phr	738730	740148	forward	deoxyribodipyrimidine photolyase (photoreactivation)
b0767	pgl	797809	798804	forward	6-phosphogluconolactonase
b0768	ybhD	798845	799861	reverse	predicted DNA-binding transcriptional regulator
b0771	ybhJ	802726	804987	forward	predicted hydratase
b0773	ybhB	806656	807132	reverse	predicted kinase inhibitor
b0787	ybhM	820016	820729	forward	conserved inner membrane protein
b0789	ybhO	821721	822962	reverse	cardiolipin synthase 2
b0790	ybhP	822959	823720	reverse	predicted DNase
b0812	dps	847631	848134	reverse	stationary phase nucleoid protein that sequesters iron and protects DNA from damage
b0833	yliE	872202	874550	forward	predicted c-di-GMP-specific phosphodiesterase
b0834	yliF	874558	875886	forward	predicted diguanylate cyclase
b0865	ybjP	903175	903690	reverse	predicted lipoprotein
b0871	poxB	908554	910272	reverse	pyruvate oxidase monomer
b0875	aqpZ	914575	915270	reverse	AqpZ
b0876	ybjD	915696	917354	forward	conserved protein with a nucleotide triphosphate hydrolase domain
b0899	ycaM	946452	947882	forward	YcaM predicted APC amino acid transporter
b0900	ycaN	947883	948791	reverse	putative transcriptional regulator LYSR-type
b0901	ycaK	948891	949481	forward	conserved protein
b0906	ycaP	955985	956677	forward	conserved inner membrane protein
b0946	zapC	1005175	1005717	forward	cell division factor ZapC, localizes to the cytokinetic ring
b0957	ompA	1018236	1019276	reverse	outer membrane protein 3a (II*;G;d)
b0965	yccU	1027169	1027582	forward	predicted CoA-binding protein with NAD(P)-binding Rossmann-fold domain
b0972	hyaA	1031362	1032480	forward	hydrogenase 1, small subunit
b0973	hyaB	1032477	1034270	forward	hydrogenase 1, large subunit
b0974	hyaC	1034289	1034996	forward	hydrogenase 1, b-type cytochrome subunit
b0975	hyaD	1034993	1035580	forward	protein involved in processing of HyaA and HyaB proteins
b0976	hyaE	1035577	1035975	forward	protein involved in quality control of HyaA
b0977	hyaF	1035972	1036829	forward	protein involved in nickel incorporation into hydrogenase 1 proteins
b0999	cbpM	1061773	1062078	reverse	chaperone-modulator protein CbpM
b1000	cbpA	1062078	1062998	reverse	CbpA monomer
b1002	agp	1064808	1066049	forward	Agp
b1003	yccJ	1066087	1066314	reverse	predicted protein
b1021	pgaD	1085329	1085742	reverse	inner membrane protein involved in biofilm formation
b1022	pgaC	1085744	1087069	reverse	UDP-N-acetyl-D-glucosamine &beta;-1,6-N-acetyl-D-glucosaminyl transferase
b1023	pgaB	1087062	1089080	reverse	poly-&beta;-1,6-N-acetyl-D-glucosamine N-deacetylase
b1024	pgaA	1089089	1091512	reverse	partially N-deacetylated poly-&beta;-1,6-N-acetyl-D-glucosamine outer membrane porin
b1025	ycdT	1092099	1093457	forward	diguanylate cyclase
b1029	ycdU	1095066	1096052	forward	predicted inner membrane protein
b1037	csgG	1100074	1100907	reverse	curli secretion channel
b1038	csgF	1100934	1101350	reverse	curli assembly component
b1039	csgE	1101375	1101764	reverse	curli transport specificity factor
b1040	csgD	1101769	1102419	reverse	CsgD DNA-binding transcriptional dual regulator
b1041	csgB	1103174	1103629	forward	curlin, minor subunit precursor
b1042	csgA	1103670	1104125	forward	curlin, major subunit
b1047	mdoC	1107007	1108164	reverse	protein required for succinyl modification of osmoregulated periplasmic glucans
b1050	yceK	1112802	1113029	forward	predicted lipoprotein
b1051	msyB	1113030	1113404	reverse	acidic protein that suppresses mutants lacking function of protein export
b1059	solA	1118691	1119809	reverse	<I>N</I>-methyltryptophan oxidase
b1060	bssS	1119924	1120178	reverse	regulator of biofilm formation
b1103	hinT	1161108	1161467	forward	purine nucleoside phosphoramidase monomer
b1104	ycfL	1161470	1161847	forward	predicted protein
b1109	ndh	1165308	1166612	forward	NADH:ubiquinone oxidoreductase II
b1155	ymfS	1207355	1207768	forward	e14 prophage; predicted protein
b1159	mcrA	1209569	1210402	forward	restriction of DNA at 5-methylcytosine residues
b1166	ariR	1215592	1215858	forward	regulator of acid resistance, influenced by indole
b1168	ycgG	1216551	1218074	forward	conserved inner membrane protein
b4520	ymgF	1218206	1218424	forward	inner membrane protein that interacts with cell division proteins
b1171	ymgD	1221528	1221857	reverse	predicted protein
b1172	ymgG	1221867	1222142	reverse	predicted protein
b1174	minE	1223502	1223768	reverse	cell division topological specificity factor and inhibitory component of the MinC-MinD-MinE system that regulates septum placement
b1177	ycgJ	1225823	1226191	forward	predicted protein
b1182	hlyE	1228706	1229617	reverse	hemolysin E
b1183	umuD	1229990	1230409	forward	SOS mutagenesis; error-prone repair; processed to UmuD'; forms complex with UmuC
b1184	umuC	1230409	1231677	forward	SOS mutagenesis and repair
b1197	treA	1244902	1246599	reverse	periplasmic trehalase
b1202	ycgV	1252308	1255175	reverse	putative adhesion and penetration protein
b1216	chaA	1269972	1271072	reverse	ChaA sodium/proton transporter
b1217	chaB	1271342	1271572	forward	predicted cation transport regulator
b1218	chaC	1271709	1272425	forward	predicted cation transport protein
b1235	rssB	1289465	1290478	forward	regulator of RpoS
b1236	galU	1290680	1291588	forward	UTP--glucose-1-phosphate uridylyltransferase
b1238	tdk	1292750	1293367	forward	thymidine kinase/deoxyuridine kinase
b1250	kch	1307040	1308293	reverse	Kch potassium VIC channel subunit
b1257	yciE	1312742	1313248	reverse	conserved protein
b4522	ymiA	1333184	1333312	forward	small predicted membrane protein
b4523	yciX	1333315	1333482	forward	predicted protein
b1283	osmB	1341134	1341352	reverse	OsmB osmotically inducible lipoprotein
b1309	ycjM	1368240	1369919	forward	predicted glucosyltransferase
b1310	ycjN	1369933	1371225	forward	YcjN
b1319	ompG	1379971	1380876	forward	outer membrane porin OmpG
b1329	mppA	1391251	1392864	forward	periplasmic murein tripeptide binding protein
b1330	ynaI	1392915	1393946	reverse	conserved inner membrane protein
b1341	ydaM	1404587	1405819	reverse	diguanylate cyclase, transcriptional modulator
b1343	dbpA	1407535	1408908	forward	ATP-dependent RNA helicase, specific for 23S rRNA
b1345	intR	1410024	1411259	reverse	Rac prophage; predicted integrase
b1346	ydaQ	1411261	1411476	reverse	Rac prophage; conserved protein
b1347	ydaC	1411555	1411764	reverse	Rac prophage; predicted protein
b1348	lar	1411757	1411951	reverse	restriction alleviation and modification enhancement
b1349	recT	1412008	1412817	reverse	recombinase, DNA renaturation
b1350	recE	1412810	1415410	reverse	exonuclease VIII, ds DNA exonuclease, 5' --> 3' specific
b1351	racC	1415512	1415787	reverse	Rac prophage; predicted protein
b4526	ydaE	1415862	1416032	reverse	Rac prophage; zinc-binding protein
b1352	kilR	1416032	1416253	reverse	Rac prophage; inhibitor of FtsZ, killing protein
b1353	sieB	1416695	1417183	forward	Rac prophage; phage superinfection exclusion protein
b1363	trkG	1421806	1423263	forward	TrkG potassium ion Trk Transporter
b1364	b1364	1423202	1423483	forward
b1365	ynaK	1423401	1423664	forward	Rac prophage; conserved protein
b1366	ydaY	1423645	1424004	forward	Rac prophage; predicted protein
b1368	ynaA	1424478	1425506	forward	Rac prophage; predicted tail protein
b1374	pinR	1431108	1431698	reverse	Rac prophage; predicted site-specific recombinase
b1380	ldhA	1439878	1440867	reverse	D-lactate dehydrogenase - fermentative
b1408	ynbA	1475645	1476250	forward	putative diacylglycerol cholinephosphotransferase
b1409	ynbB	1476250	1477146	forward	predicted CDP-diglyceride synthase
b1410	ynbC	1477162	1478919	forward	predicted hydrolase
b1431	ydcL	1500481	1501149	forward	predicted lipoprotein
b1442	ydcU	1511855	1512796	forward	YdcU
b1443	ydcV	1512786	1513580	forward	YdcV
b1444	ydcW	1513602	1515026	forward	&gamma;-aminobutyraldehyde dehydrogenase
b1449	curA	1517051	1518088	forward	NADPH-dependent curcumin/dihydrocurcumin reductase subunit
b1450	mcbR	1518286	1518951	forward	McbR DNA-binding transcriptional dual regulator
b1469	narU	1540696	1542084	reverse	NarU MFS nitrate/nitrite antiporter
b1482	osmC	1554649	1555080	forward	osmotically inducible peroxidase OsmC
b1489	dosP	1561358	1563757	reverse	c-di-GMP phosphodiesterase, heme-regulated
b1490	dosC	1563782	1565164	reverse	diguanylate cyclase
b1492	gadC	1566978	1568513	reverse	GadC GABA APC transporter
b1493	gadB	1568669	1570069	reverse	glutamate decarboxylase B subunit
b1494	pqqL	1570431	1573226	reverse	putative zinc peptidase
b1495	yddB	1573271	1575643	reverse	predicted porin protein
b1496	yddA	1575681	1577366	reverse	YddA
b1497	ydeM	1577657	1578814	reverse	predicted anaerobic sulfatase maturation enzyme; predicted DNA-binding transcriptional regulator
b1498	ydeN	1578866	1580548	reverse	putative sulfatase
b1499	ydeO	1580950	1581711	reverse	YdeO DNA-binding transcriptional dual regulator
b1500	safA	1581786	1581983	reverse	two-component system connector protein
b1502	ydeQ	1584844	1585758	reverse	predicted fimbrial-like adhesin protein
b1503	ydeR	1585817	1586320	reverse	predicted fimbrial-like adhesin protein
b1504	ydeS	1586333	1586863	reverse	predicted fimbrial-like adhesin protein
b1505	ydeT	1586877	1588025	reverse	predicted protein
b1513	lsrA	1599514	1601049	forward	LsrA
b1514	lsrC	1601043	1602071	forward	LsrC
b1516	lsrB	1603075	1604097	forward	LsrB
b1517	lsrF	1604124	1604999	forward	predicted class I aldolase
b1518	lsrG	1605023	1605313	forward	Autoinducer 2-degrading protein
b1519	tam	1605370	1606128	forward	trans-aconitate methyltransferase
b1521	uxaB	1607253	1608704	reverse	altronate oxidoreductase
b1527	yneK	1613787	1614902	forward	predicted protein
b4599	yneM	1620670	1620765	forward	small membrane protein
b1535	ydeH	1620984	1621874	reverse	diguanylate cyclase
b1536	ydeI	1622129	1622521	reverse	stress response protein
b1537	ydeJ	1622797	1623315	forward	conserved protein
b1542	ydfI	1627477	1628937	reverse	predicted mannonate dehydrogenase
b1543	ydfJ	1629026	1630309	reverse	predicted transporter
b1544	ydfK	1631096	1631329	forward	Qin prophage; cold shock gene, predicted DNA-binding transcriptional regulator
b1545	pinQ	1631646	1632236	forward	Qin prophage; predicted site-specific recombinase
b1549	ydfO	1635071	1635481	forward	Qin prophage; predicted protein
b1550	gnsB	1635633	1635806	reverse	Qin prophage; predicted protein
b1551	ynfN	1635978	1636133	reverse	Qin prophage; predicted protein
b1552	cspI	1636479	1636691	reverse	Qin prophage; cold shock protein
b1553	ydfP	1637054	1637551	reverse	Qin prophage; conserved protein
b1580	rspB	1650920	1651939	reverse	predicted oxidoreductase, Zn-dependent and NAD(P)-binding
b1599	mdtI	1670844	1671173	reverse	MdtI SMR Protein
b1600	mdtJ	1671160	1671525	reverse	MdtJ SMR protein
b1601	tqsA	1671937	1672971	forward	quorum signal AI-2 exporter
b1614	ydgA	1687876	1689384	forward	conserved protein
b1615	uidC	1689610	1690875	reverse	membrane-associated protein
b1619	hdhA	1695297	1696064	reverse	HdhA
b4409	blr	1702575	1702700	forward	&beta;-lactam resistance protein
b1625	cnu	1702973	1703188	forward	H-NS- and StpA-binding protein
b1626	ydgK	1703274	1703714	forward	conserved inner membrane protein
b1628	rsxB	1704372	1704950	forward	member of SoxR-reducing complex
b1629	rsxC	1704943	1707165	forward	member of SoxR-reducing complex
b1651	gloA	1725861	1726268	forward	GloA
b1661	cfa	1739437	1740585	forward	cyclopropane fatty acyl phospholipid synthase
b1668	ydhS	1745155	1746759	forward	conserved protein with FAD/NAD(P)-binding domain
b1669	ydhT	1746771	1747583	reverse	conserved protein
b1670	ydhU	1747587	1748372	reverse	predicted cytochrome
b1671	ydhX	1748369	1749088	reverse	predicted 4Fe-4S ferredoxin-type protein
b1672	ydhW	1749101	1749748	reverse	predicted protein
b1673	ydhV	1749752	1751854	reverse	predicted oxidoreductase
b1674	ydhY	1751875	1752501	reverse	predicted 4Fe-4S ferredoxin-type protein
b1675	ydhZ	1752956	1753165	reverse	predicted protein
b1676	pykF	1753722	1755134	forward	pyruvate kinase I monomer
b1679	sufE	1756898	1757314	reverse	sulfur acceptor that activates SufS cysteine desulfurase
b1680	sufS	1757327	1758547	reverse	L-selenocysteine lyase (and L-cysteine desulfurase) monomer
b1681	sufD	1758544	1759815	reverse	SufD component of SufBCD Fe-S cluster scaffold complex
b1682	sufC	1759790	1760536	reverse	SufC component of SufBCD Fe-S cluster scaffold complex
b1683	sufB	1760546	1762033	reverse	SufB component of SufBCD Fe-S cluster scaffold complex
b1684	sufA	1762042	1762410	reverse	Fe-S cluster assembly, scaffold protein
b1689	ydiL	1768639	1768995	forward	conserved protein
b1690	ydiM	1769095	1770309	forward	predicted transporter
b1691	ydiN	1770536	1771801	forward	predicted amino acid/amine MFS transporter
b1692	ydiB	1771813	1772679	forward
b1693	aroD	1772710	1773468	forward	AroD
b1703	ppsR	1785469	1786302	forward	PEP synthetase regulatory protein
b1707	ydiV	1789331	1790044	reverse	conserved protein
b1734	chbF	1815172	1816524	reverse	diacetylchitobiose-6-phosphate hydrolase
b1735	chbR	1816629	1817471	reverse	ChbR DNA-binding transcriptional dual regulator
b1736	chbA	1817479	1817829	reverse	ChbA
b1737	chbC	1817880	1819238	reverse	ChbC
b1739	osmE	1819942	1820280	reverse	osmotically inducible protein OsmE
b1762	ynjI	1841855	1842895	reverse	predicted inner membrane protein
b1769	ydjE	1850645	1852003	reverse	YdjE MFS transporter
b1771	ydjG	1853015	1853995	reverse	methylglyoxal reductase (NADH-dependent)
b1772	ydjH	1854005	1854952	reverse	predicted kinase
b1773	ydjI	1854957	1855793	reverse	predicted aldolase
b1774	ydjJ	1855814	1856857	reverse	predicted oxidoreductase, Zn-dependent and NAD(P)-binding
b1785	yeaI	1868409	1869884	forward	predicted diguanylate cyclase
b1786	yeaJ	1870065	1871555	forward	predicted diguanylate cyclase
b1787	yeaK	1871598	1872101	forward	conserved protein
b1795	yeaQ	1877031	1877279	reverse	conserved inner membrane protein
b1798	leuE	1878145	1878783	reverse	LeuE leucine RhtB transporter
b1810	yoaC	1892097	1892456	forward	predicted protein
b1823	cspC	1905250	1905459	reverse	stress protein, member of the CspA family; predicted DNA-binding transcriptional regulator
b1824	yobF	1905472	1905615	reverse	small protein involved in stress responses
b1836	yebV	1919804	1920040	forward	predicted protein
b1861	ruvA	1943389	1944000	reverse	branch migration of Holliday structures; repair
b1862	yebB	1944275	1944877	forward	predicted protein
b1872	torZ	1952602	1955031	reverse	trimethylamine N-oxide reductase III, TorZ subunit
b1873	torY	1955056	1956156	reverse	trimethylamine N-oxide reductase III, <I>c</I>-type cytochrome subunit
b1877	yecT	1959996	1960484	forward	predicted protein
b1896	otsA	1978212	1979636	reverse	trehalose-6-phosphate synthase
b1897	otsB	1979611	1980411	reverse	trehalose-6-phosphate phosphatase
b1900	araG	1981579	1983093	reverse	AraG
b1901	araF	1983163	1984152	reverse	AraF
b1906	yecH	1987275	1987514	reverse	predicted protein
b1927	amyA	2004180	2005667	forward	&alpha;-amylase
b1950	fliR	2020917	2021702	forward	flagellar biosynthesis protein FliR
b1951	rcsA	2021992	2022615	forward	positive DNA-binding transcriptional regulator of capsular polysaccharide synthesis, activates its own expression
b1967	hchA	2033859	2034710	forward	glyoxalase III, Hsp31 molecular chaperone
b1968	yedV	2034818	2036176	reverse	predicted sensory kinase in two-component regulatory system with YedW
b1969	yedW	2036176	2036847	reverse	predicted DNA-binding response regulator in two-component system with YedV
b1970	yedX	2036980	2037393	forward	conserved protein
b1971	yedY	2037502	2038506	forward	reductase
b1983	yeeN	2054882	2055598	forward	conserved protein
b2028	ugd	2096471	2097637	reverse	UDP-glucose 6-dehydrogenase
b2029	gnd	2097886	2099292	reverse	Gnd
b2036	glf	2105250	2106353	reverse	UDP-galactopyranose mutase
b2037	rfbX	2106361	2107608	reverse	RfbX lipopolysaccharide PST transporter
b2038	rfbC	2107605	2108162	reverse	dTDP-4-dehydrorhamnose 3,5-epimerase
b2039	rfbA	2108162	2109043	reverse	dTDP-glucose pyrophosphorylase
b2040	rfbD	2109101	2110000	reverse	dTDP-4-dehydrorhamnose reductase
b2041	rfbB	2110000	2111085	reverse	RmlB
b2042	galF	2111458	2112351	reverse	predicted uridylyltransferase subunit with GalU
b2063	yegH	2135926	2137509	forward	putative transport protein
b2071	yegJ	2149209	2149670	forward	predicted protein
b2080	yegP	2163213	2163545	forward	predicted protein
b2085	yegR	2166013	2166330	reverse	predicted protein
b2086	yegS	2166736	2167635	forward	lipid kinase
b2090	gatR_2	2169419	2169757	reverse	GatR_2
b2097	fbaB	2175534	2176586	reverse	fructose bisphosphate aldolase monomer
b2107	rcnB	2184982	2185320	forward	periplasmic protein involved in nickel/cobalt efflux
b2119	yehL	2202618	2203706	forward	predicted transporter subunit: ATP-binding component of ABC superfamily
b2120	yehM	2203717	2205996	forward	predicted protein
b2129	yehX	2214503	2215429	reverse	YehX
b2130	yehY	2215422	2216579	reverse	YehY
b2131	osmF	2216586	2217503	reverse	OsmF
b2137	yohF	2224531	2225292	reverse	predicted oxidoreductase with NAD(P)-binding Rossmann-fold domain
b4679	yohP	2227004	2227087	forward	small membrane protein
b2145	yeiS	2231622	2231861	forward	predicted inner membrane protein
b2146	preT	2232055	2233293	forward	NADH-dependent dihydropyrimidine dehydrogenase subunit
b2147	preA	2233287	2234522	forward	NADH-dependent dihydropyrimidine dehydrogenase subunit
b2156	lysP	2245085	2246554	reverse	LysP lysine APC transporter
b2161	nupX	2250917	2252167	reverse	putative pyrimidine nucleoside transporter
b2162	rihB	2252267	2253208	reverse	ribonucleoside hydrolase 2 (pyrimidine-specific)
b2163	yeiL	2253377	2254036	forward	YeiL DNA-binding transcriptional activator
b2164	yeiM	2254107	2255357	reverse	YeiM NUP transporter
b2165	pscG	2255451	2256389	reverse	predicted pseudouridine 5'-phosphate glycosidase
b2166	pscK	2256377	2257318	reverse	predicted pseudouridine kinase
b2190	yejO	2284412	2286922	reverse	predicted autotransporter outer membrane protein
b2251	nudI	2362576	2363001	forward	pyrimidine deoxynucleoside triphosphate pyrophosphohydrolase
b2252	ais	2363040	2363642	reverse	protein induced by aluminum
b2253	arnB	2363932	2365089	forward	UDP-L-Ara4O C-4\" transaminase
b2266	elaB	2378744	2379049	reverse	conserved protein
b2273	yfbN	2385732	2386448	reverse	predicted protein
b2274	yfbO	2386603	2387079	forward	predicted protein
b2302	yfcG	2418643	2419290	forward	disulfide bond reductase
b2351	yfdH	2466236	2467156	forward	CPS-53 (KpLE1) prophage; bactoprenyl glucosyl transferase
b2360	yfdQ	2472054	2472878	forward	CPS-53 (KpLE1) prophage; predicted protein
b2367	emrY	2478660	2480198	reverse	EmrY putative multidrug MFS transporter
b2368	emrK	2480198	2481361	reverse	EmrK putative membrane fusion protein
b2369	evgA	2481777	2482391	forward	EvgA transcriptional regulator
b2370	evgS	2482396	2485989	forward	EvgS sensory histidine kinase
b2405	xapR	2519615	2520499	reverse	XapR transcriptional activator
b2419	yfeK	2535364	2535738	forward	predicted protein
b2506	yfgI	2628348	2628887	forward	putative membrane protein
b2543	yphA	2671296	2671790	forward	predicted inner membrane protein
b2547	yphE	2674872	2676383	reverse	YphE
b2548	yphF	2676406	2677389	reverse	YphF
b2572	rseA	2706776	2707426	reverse	anti-sigma factor
b2573	rpoE	2707459	2708034	reverse	RNA polymerase, sigma 24 (sigma E) factor
b2579	yfiD	2714088	2714471	reverse	stress-induced alternate pyruvate formate-lyase subunit
b2601	aroF	2738102	2739172	reverse	AroF
b2602	yfiL	2739382	2739747	forward	putative lipoprotein
b2604	yfiN	2740405	2741631	forward	predicted diguanylate cyclase
b2605	yfiB	2741647	2742129	forward	predicted outer membrane lipoprotein
b2623	yfjH	2755666	2756622	reverse	CP4-57 prophage; predicted protein
b2647	ypjA	2776168	2780748	reverse	adhesin-like autotransporter
b2654	ygaQ_1	2784419	2784751	forward	predicted protein
b2665	ygaU	2794359	2794808	reverse	predicted protein
b2668	ygaP	2795542	2796066	forward	predicted inner membrane protein with hydrolase activity
b2669	stpA	2796113	2796517	reverse	H-NS-like DNA-binding protein with RNA chaperone activity
b2672	ygaM	2798156	2798497	forward	predicted protein
b2677	proV	2802837	2804039	forward	ProV
b2678	proW	2804032	2805096	forward	ProW
b2734	pphB	2857782	2858438	forward	protein-tyrosine-phosphatase/phosphoprotein phosphatase
b2751	cysN	2872014	2873441	reverse	CysN
b2752	cysD	2873443	2874351	reverse	CysD
b2753	iap	2874603	2875640	forward	alkaline phosphatase isozyme conversion protein
b2754	cas2	2876591	2876875	reverse	predicted endoribonuclease
b2755	cas1	2876877	2877794	reverse	multifunctional nuclease
b2756	casE	2877810	2878409	reverse	crRNA endonuclease
b2757	casD	2878396	2879070	reverse	Cascade subunit D
b2758	casC	2879073	2880164	reverse	Cascade subunit C
b2759	casB	2880177	2880659	reverse	Cascade subunit B
b2760	casA	2880652	2882160	reverse	Cascade subunit A
b2761	cas3	2882575	2885241	reverse	protein involved in CRISPR R-loop formation and dissociation
b2775	yqcE	2898614	2899891	forward	YqcE MFS transporter
b2776	ygcE	2899918	2901396	forward	predicted kinase
b2778	ygcG	2903733	2904605	forward	predicted protein
b2779	eno	2904665	2905963	reverse	Eno
b2787	gudD	2916067	2917407	reverse	<i>D</i>-glucarate dehydratase
b2789	gudP	2918770	2920122	reverse	YgcZ MFS transporter
b2799	fucO	2929887	2931038	reverse	L-1,2-propanediol oxidoreductase monomer
b2800	fucA	2931063	2931710	reverse
b2801	fucP	2932257	2933573	forward	FucP fucose MFS transporter
b2802	fucI	2933606	2935381	forward
b2803	fucK	2935460	2936908	forward	L-fuculokinase
b2804	fucU	2936910	2937332	forward	L-fucose mutarotase
b2809	ygdI	2940940	2941167	reverse	putative lipoprotein
b2846	yqeH	2985558	2986190	forward	conserved protein with bipartite regulator domain
b2847	yqeI	2986524	2987333	forward	predicted transcriptional regulator
b2848	yqeJ	2987326	2987808	forward	predicted protein
b2862	ygeP	2995711	2996010	reverse	predicted protein
b2863	ygeQ	2996056	2996850	reverse	predicted protein
b2866	xdhA	2998367	3000625	forward	xanthine dehydrogenase subunit
b2867	xdhB	3000636	3001514	forward	xanthine dehydrogenase subunit, FAD-binding domain
b2868	xdhC	3001511	3001990	forward	xanthine dehydrogenase, Fe-S subunit
b2870	ygeW	3004284	3005474	forward	predicted carbamoyltransferase
b2871	ygeX	3005532	3006728	forward	2,3-diaminopropionate ammonia-lyase monomer
b2872	ygeY	3006786	3007997	forward	predicted peptidase
b2873	hyuA	3008050	3009435	forward	phenylhydantoinase monomer
b2874	yqeA	3009483	3010415	forward	predicted amino acid kinase
b2877	mocA	3013182	3013760	forward	CTP:molybdopterin cytidylyltransferase
b2878	ygfK	3014082	3017180	forward	putative oxidoreductase Fe-S subunit; possible component of selenate reductase
b2879	ssnA	3017183	3018511	forward	predicted chlorohydrolase/aminohydrolase
b2880	ygfM	3018562	3019341	forward	predicted oxidoreductase; possible component of selenate reductase
b2881	xdhD	3019338	3022208	forward	putative oxidoreductase; possible component of selenate reductase with possible role in purine salvage
b2882	xanQ	3022373	3023773	forward	XanQ xanthine NCS2 transporter
b2883	guaD	3023788	3025107	forward	guanine deaminase
b4464	ygfQ	3025143	3026510	forward	predicted transporter
b2886	ygfS	3026546	3027034	reverse	predicted oxidoreductase, 4Fe-4S ferredoxin-type subunit
b2888	ygfU	3029389	3030837	forward	YgfU NCS2 transporter
b2889	idi	3031087	3031635	forward	isopentenyl diphosphate isomerase
b2921	ygfI	3064299	3065195	reverse	predicted DNA-binding transcriptional regulator LYSR-type
b2922	yggE	3065362	3066102	reverse	conserved protein
b2923	argO	3066195	3066830	reverse	arginine export protein
b2930	yggF	3073239	3074204	reverse	fructose-1,6-bisphosphatase
b4465	yggP	3074201	3075478	reverse	predicted dehydrogenase
b2933	cmtA	3075493	3076881	reverse	CmtA
b2934	cmtB	3076909	3077352	reverse	CmtB
b2958	yggN	3098926	3099645	reverse	predicted protein
b4466	yghJ	3112572	3117134	reverse	predicted inner membrane lipoprotein
b3003	yghA	3147684	3148568	forward	predicted glutathionylspermidine synthase, with NAD(P)-binding Rossmann-fold domain
b3027	ygiZ	3169901	3170233	reverse	conserved inner membrane protein
b3041	ribB	3181835	3182488	reverse	3,4-dihydroxy-2-butanone 4-phosphate synthase
b3046	yqiG	3185422	3187887	forward	putative membrane protein
b3047	yqiH	3187903	3188652	forward	putative membrane protein
b3048	yqiI	3188654	3189718	forward	protein involved in detoxification of methylglyoxal
b3055	ygiM	3199229	3199849	forward	predicted signal transduction protein (SH3 domain)
b3060	ttdR	3203346	3204278	reverse	Dan
b3073	ygjG	3217516	3218895	forward	putrescine aminotransferase/diamine transaminase
b3078	ygjI	3224256	3225689	forward	YgjI APC transporter
b3091	uxaA	3239849	3241336	reverse	D-altronate dehydratase
b3092	uxaC	3241351	3242763	reverse	D-glucuronate isomerase/D-galacturonate isomerase
b3093	exuT	3243126	3244544	forward	ExuT hexuronate MFS transporter
b3098	yqjD	3247397	3247702	forward	conserved protein
b3103	yhaH	3250326	3250691	forward	putative cytochrome
b4470	yhaM	3253363	3254673	reverse	conserved protein
b3110	yhaO	3254701	3255969	reverse	YhaO STP transporter
b4471	tdcG	3256307	3257671	reverse	L-serine deaminase III
b3113	tdcF	3257743	3258132	reverse	predicted L-PSP (mRNA) endoribonuclease
b3114	tdcE	3258146	3260440	reverse	2-ketobutyrate formate-lyase/pyruvate formate-lyase 4, inactive
b3115	tdcD	3260474	3261694	reverse	propionate kinase
b3116	tdcC	3261708	3263039	reverse	TdcC threonine/serine STP transporter
b3117	tdcB	3263061	3264050	reverse	TdcB
b3118	tdcA	3264149	3265087	reverse	TdcA DNA-binding transcriptional activator
b3124	garK	3268647	3269873	reverse	glycerate kinase I
b3125	garR	3269889	3270779	reverse	tartronate semialdehyde reductase
b3126	garL	3270809	3271579	reverse
b3127	garP	3271595	3272929	reverse	YhaU MFS transporter
b3128	garD	3273304	3274875	forward	galactarate dehydratase
b3129	sohA	3275024	3275359	forward	PrlF antitoxin
b3137	kbaY	3281165	3282025	forward	KbaY
b3138	agaB	3282192	3282668	forward	AgaB
b3139	agaC	3282707	3283510	forward	AgaC
b3140	agaD	3283500	3284291	forward
b3153	yhbO	3296996	3297514	forward	protein involved in stress response
b3173	yhbX	3318010	3319635	reverse	predicted hydrolase, inner membrane
b3267	yhdV	3416412	3416633	forward	predicted outer membrane lipoprotein
b3291	mscL	3436046	3436456	forward	MscL
b3322	gspB	3451530	3451949	reverse	calcium-binding protein required for initiation of chromosome replication
b3323	gspA	3451951	3453420	reverse	general secretory pathway component, cryptic
b3324	gspC	3453600	3454415	forward	putative protein secretion protein for export
b3325	gspD	3454399	3456351	forward	putative protein secretion protein for export
b3326	gspE	3456361	3457842	forward	putative protein secretion protein for export
b3327	gspF	3457839	3459035	forward	putative protein secretion protein for export
b3328	gspG	3459045	3459482	forward	putative protein secretion protein for export
b3329	gspH	3459490	3459999	forward	putative protein secretion protein for export
b3336	bfr	3464271	3464747	reverse	bacterioferritin monomer
b3338	chiA	3465182	3467875	reverse	endochitinase
b3369	yhfL	3497470	3497637	forward	conserved secreted peptide
b3447	ggt	3583104	3584846	reverse	&gamma;-glutamyltranspeptidase
b3506	slp	3651984	3652550	forward	starvation lipoprotein
b3507	dctR	3652706	3653236	forward	predicted DNA-binding transcriptional regulator
b3508	yhiD	3653278	3653925	reverse	predicted Mg(2+) transport ATPase
b3509	hdeB	3653989	3654315	reverse	acid stress chaperone
b3510	hdeA	3654431	3654763	reverse	acid-resistance protein, possible chaperone
b3511	hdeD	3655018	3655590	forward	acid-resistance membrane protein
b3512	gadE	3656389	3656916	forward	GadE DNA-binding transcriptional activator
b3513	mdtE	3657255	3658412	forward	MdtE
b3514	mdtF	3658437	3661550	forward	MdtF
b3515	gadW	3661913	3662641	reverse	GadW DNA-binding transcriptional dual regulator
b3516	gadX	3663009	3663833	reverse	GadX DNA-binding transcriptional dual regulator
b3517	gadA	3664203	3665603	reverse	glutamate decarboxylase A subunit
b3519	treF	3667615	3669264	forward	cytoplasmic trehalase
b3522	yhjD	3671385	3672398	forward	conserved inner membrane protein
b3524	yhjG	3674313	3676388	reverse	predicted outer membrane biogenesis protein
b3534	bcsQ	3693256	3693984	reverse	predicted cellulose biosynthesis protein
b3535	yhjR	3694020	3694208	reverse	conserved protein
b3536	bcsE	3694481	3696052	forward	conserved protein
b3537	bcsF	3696049	3696240	forward	predicted protein
b3538	bcsG	3696237	3697916	forward	predicted inner membrane protein
b3555	yiaG	3717501	3717791	forward	predicted transcriptional regulator
b3562	yiaA	3724947	3725384	reverse	conserved inner membrane protein
b3565	xylA	3727466	3728788	reverse	XylA
b3566	xylF	3729154	3730146	forward	XylF
b3567	xylG	3730224	3731765	forward	XylG
b3568	xylH	3731743	3732924	forward	XylH
b3578	yiaN	3742827	3744104	forward	YiaN
b3579	yiaO	3744117	3745103	forward	YiaO
b3580	lyxK	3745107	3746603	forward	L-xylulose kinase
b3581	sgbH	3746600	3747262	forward	3-keto-L-gulonate 6-phosphate decarboxylase
b3582	sgbU	3747255	3748115	forward	predicted L-xylulose 5-phosphate 3-epimerase
b3593	rhsA	3760206	3764339	forward	RhsA protein in rhs element
b3615	yibD	3787070	3788104	reverse	predicted glycosyl transferase
b3618	htrL	3790849	3791706	reverse	involved in lipopolysaccharide biosynthesis
b3621	waaC	3794002	3794961	forward	ADP-heptose:LPS heptosyl transferase I
b3622	rfaL	3794971	3796230	forward	O-antigen ligase
b3661	nlpA	3837198	3838016	reverse	lipoprotein-28
b3663	yicN	3839973	3840425	reverse	conserved protein
b3664	yicO	3840478	3841812	reverse	putative membrane protein with possible relationship to novobiocin and deoxycholate resistance
b3665	ade	3841987	3843753	forward	cryptic adenine deaminase monomer
b3680	yidL	3858276	3859199	forward	putative ARAC-type regulatory protein
b3707	tnaC	3886458	3886532	forward	tna operon leader peptide
b3708	tnaA	3886753	3888168	forward	TnaA
b3709	tnaB	3888259	3889506	forward	TnaB tryptophan ArAAP transporter
b3718	yieK	3896694	3897416	reverse	predicted 6-phosphogluconolactonase
b3719	yieL	3897431	3898627	reverse	predicted xylanase
b3720	bglH	3898627	3900243	reverse	carbohydrate-specific outer membrane porin, cryptic
b3721	bglB	3900312	3901724	reverse	6-phospho-&beta;-glucosidase B; cryptic
b3722	bglF	3901743	3903620	reverse	BglF
b3723	bglG	3903754	3904590	reverse	BglG transcriptional antiterminator (monomer)
b3817	yigF	4000442	4000822	reverse	conserved inner membrane protein
b3818	yigG	4000836	4001216	reverse	inner membrane protein
b3861	yihF	4042222	4043652	forward	putative GTP-binding protein
b3873	yihM	4059188	4060168	forward	conserved protein
b3874	yihN	4060270	4061535	forward	YihN MFS transporter
b3875	ompL	4061626	4062318	reverse	predicted outer membrane porin L
b3876	yihO	4062386	4063789	reverse	YihO GPH transporter
b3877	yihP	4063832	4065238	reverse	YihP GPH transporter
b3878	yihQ	4065263	4067299	reverse	&alpha;-glycosidase
b3922	yiiS	4110990	4111289	forward	conserved protein
b3923	uspD	4111316	4111744	forward	stress protein involved in resistance to UV irradiation
b4024	lysC	4229907	4231256	reverse	LysC
b4031	xylE	4238802	4240277	reverse	XylE xylose MFS transporter
b4032	malG	4240649	4241539	reverse	MalG
b4061	yjcC	4273494	4275080	forward	predicted c-di-GMP-specific phosphodiesterase
b4086	alsC	4306512	4307492	reverse	AlsC
b4087	alsA	4307471	4309003	reverse	AlsA
b4108	yjdM	4324422	4324757	reverse	conserved protein
b4109	yjdA	4325158	4327386	forward	conserved protein with nucleoside triphosphate hydrolase domain
b4110	yjcZ	4327383	4328261	forward	conserved protein
b4115	adiC	4333717	4335054	reverse	AdiC
b4116	adiY	4335191	4335952	reverse	AdiY DNA-binding transcriptional activator
b4119	melA	4339934	4341289	forward	&alpha;-galactosidase monomer
b4122	fumB	4343703	4345349	reverse	fumarase B monomer
b4123	dcuB	4345427	4346767	reverse	DcuB dicarboxylate Dcu transporter
b4126	yjdI	4349866	4350096	forward	conserved protein
b4127	yjdJ	4350108	4350380	forward	predicted acyltransferase with acyl-CoA N-acyltransferase domain
b4128	yjdK	4350607	4350903	forward	predicted protein
b4559	yjdO	4350931	4351104	forward	predicted protein
b4131	cadA	4354493	4356640	reverse	CadA
b4132	cadB	4356720	4358054	reverse	CadB cadaverine/lysine APC exchanger
b4133	cadC	4358419	4359957	reverse	CadC DNA-binding transcriptional activator
b4145	yjeJ	4371388	4372257	reverse	predicted protein
b4156	yjeM	4381862	4383364	forward	YjeM APC transporter
b4157	yjeN	4383416	4383730	forward	predicted protein
b4181	yjfI	4408156	4408557	forward	conserved protein
b4182	yjfJ	4408576	4409274	forward	predicted transcriptional regulator effector protein
b4183	yjfK	4409325	4409984	forward	conserved protein
b4184	yjfL	4410002	4410400	forward	conserved inner membrane protein
b4185	yjfM	4410410	4411048	forward	conserved protein
b4186	yjfC	4411051	4412214	forward	predicted synthetase/amidase
b4187	aidB	4412298	4413923	forward	AidB
b4242	mgtA	4465648	4468344	forward	magnesium transporter
b4265	idnT	4489229	4490548	reverse	L-idonate / 5-ketogluconate / gluconate transporter
b4266	idnO	4490610	4491374	reverse	5-keto-D-gluconate 5-reductase
b4267	idnD	4491398	4492429	reverse	L-idonate 5-dehydrogenase
b4268	idnK	4492646	4493209	forward	D-gluconate kinase, thermosensitive
b4269	yjgB	4493213	4494232	reverse	predicted alcohol dehydrogenase, Zn-dependent and NAD(P)-binding
b4296	yjhF	4518694	4520043	reverse	YjhF Gnt tranporter
b4297	yjhG	4520150	4522117	reverse	KpLE2 phage-like element; predicted dehydratase
b4298	yjhH	4522128	4523033	reverse	predicted lyase/synthase
b4299	yjhI	4523038	4523826	reverse	KpLE2 phage-like element; predicted DNA-binding transcriptional regulator
b4300	sgcR	4524129	4524911	reverse	Putative sgc cluster transcriptional regulator
b4308	yjhR	4533038	4534054	forward	KpLE2 phage-like element; predicted frameshift suppressor
b4309	nanS	4534637	4535617	reverse	probable 9-<i>O</i>-acetyl-<i>N</i>-acetylneuraminate esterase
b4310	nanM	4535682	4536788	reverse	<i>N</i>-acetylneuraminate mutarotase
b4313	fimE	4540060	4540656	forward	regulator for fimA
b4314	fimA	4541138	4541686	forward	major type 1 subunit fimbrin (pilin)
b4315	fimI	4541751	4542290	forward	fimbrial protein
b4316	fimC	4542327	4543052	forward	periplasmic chaperone, required for type 1 fimbriae
b4317	fimD	4543119	4545755	forward	outer membrane protein; export and assembly of type 1 fimbriae
b4318	fimF	4545765	4546295	forward	fimbrial morphology
b4319	fimG	4546308	4546811	forward	fimbrial morphology
b4320	fimH	4546831	4547733	forward	minor fimbrial subunit, D-mannose specific adhesin
b4322	uxuA	4549659	4550843	forward	D-mannonate dehydratase
b4342	yjiT	4570437	4571954	forward	conserved protein
b4345	mcrC	4574935	4575981	reverse	MrcC subunit of 5-methylcytosine restriction system
b4346	mcrB	4575981	4577360	reverse	MrcB subunit of 5-methylcytosine restriction system
b4364	yjjP	4600111	4600881	reverse	predicted inner membrane structural protein
b4365	yjjQ	4601500	4602225	forward	predicted DNA-binding transcriptional regulator
b4366	bglJ	4602183	4602860	forward	BglJ DNA-binding transcriptional regulator

## Sheet: control
Control genes
ORF	Synonym	Start	End	Direction	Annotation
b0001	thrL	190	255	forward	thr operon leader peptide
b0002	thrA	337	2799	forward	ThrA
b0003	thrB	2801	3733	forward	ThrB
b0004	thrC	3734	5020	forward	threonine synthase
b0005	yaaX	5234	5530	forward	predicted protein
b0006	yaaA	5683	6459	reverse	protein that reduces intracellular iron levels under peroxide stress
b0007	yaaJ	6529	7959	reverse	YaaJ alanine AGSS transporter
b0008	talB	8238	9191	forward	transaldolase B
b0009	mog	9306	9893	forward	predicted molybdochelatase
b0010	yaaH	9928	10494	reverse	conserved inner membrane protein associated with acetate transport
b0011	yaaW	10643	11356	reverse	conserved protein
b0013	yaaI	11382	11786	reverse	predicted protein
b0015	dnaJ	14168	15298	forward	chaperone with DnaK; heat shock protein
b0018	mokC	16751	16960	reverse	regulatory peptide whose translation enables hokC (gef) expression
b0019	nhaA	17489	18655	forward	NhaA
b0023	rpsT	20815	21078	reverse	30S ribosomal subunit protein S20
b0024	yaaY	21181	21399	forward	predicted protein
b0025	ribF	21407	22348	forward	bifunctional riboflavin kinase / FMN adenylyltransferase
b0026	ileS	22391	25207	forward	isoleucyl-tRNA synthetase
b0027	lspA	25207	25701	forward	prolipoprotein signal peptidase II
b0028	fkpB	25826	26275	forward	peptidylprolyl isomerase
b0029	ispH	26277	27227	forward	1-hydroxy-2-methyl-2-(E)-butenyl 4-diphosphate reductase
b0030	rihC	27293	28207	forward	ribonucleoside hydrolase 3
b0031	dapB	28374	29195	forward	DapB
b0032	carA	29651	30799	forward	CarA
b0033	carB	30817	34038	forward	CarB
b0035	caiE	34781	35371	reverse	predicted acyl transferase
b0039	caiA	39244	40386	reverse	crotonobetainyl-CoA reductase
b0046	kefF	47246	47776	forward	regulator of KefC-mediated potassium transport and quinone oxidoreductase
b0047	kefC	47769	49631	forward	KefC potassium CPA2 transporter
b0048	folA	49823	50302	forward	dihydrofolate reductase
b0049	apaH	50380	51222	reverse	diadenosine tetraphosphatase
b0050	apaG	51229	51606	reverse	hypothetical protein
b0051	rsmA	51609	52430	reverse	16S rRNA m<sup>6</sup><sub>2</sub>A1518,m<sup>6</sup><sub>2</sub>A1519 dimethyltransferase
b0052	pdxA	52427	53416	reverse	PdxA
b0053	surA	53416	54702	reverse	peptidyl-prolyl cis-trans isomerase (PPIase)
b0054	lptD	54755	57109	reverse	LptD
b0055	djlA	57364	58179	forward	chaperone with DnaK
b0057	yabQ	59121	59279	forward	predicted protein
b0058	rluA	59687	60346	reverse	23S rRNA and tRNA pseudouridine synthase
b0059	hepA	60358	63264	reverse	RNA Polymerase (RNAP)-binding ATPase and RNAP recycling factor
b0060	polB	63429	65780	reverse	DNA polymerase II
b0061	araD	65855	66550	reverse	L-ribulose 5-phosphate 4-epimerase monomer
b0062	araA	66835	68337	reverse	L-arabinose isomerase monomer
b0063	araB	68348	70048	reverse	L-ribulokinase monomer
b0064	araC	70387	71265	forward	AraC
b0065	yabI	71351	72115	forward	conserved inner membrane protein
b0066	thiQ	72229	72927	reverse	SfuC
b0067	thiP	72911	74521	reverse	SfuB
b0068	tbpA	74497	75480	reverse	thiamin-binding protein
b0069	sgrR	75644	77299	reverse	SgrR DNA-binding transcriptional dual regulator
b0070	setA	77621	78799	forward	SetA MFS transporter
b0071	leuD	78848	79453	reverse	LeuD
b0072	leuC	79464	80864	reverse	LeuC
b0073	leuB	80867	81958	reverse	LeuB
b0074	leuA	81958	83529	reverse	2-isopropylmalate synthase
b0075	leuL	83622	83708	reverse	leu operon leader peptide
b0077	ilvI	85630	87354	forward	IlvI
b0078	ilvH	87357	87848	forward	IlvH
b0080	fruR	88028	89032	forward	FruR transcriptional dual regulator
b0081	mraZ	89634	90092	forward	conserved protein
b0082	rsmH	90094	91035	forward	16S rRNA m<sup>4</sup>C1402 methyltransferase
b0083	ftsL	91032	91397	forward	essential cell division protein FtsL
b0084	ftsI	91413	93179	forward	essential cell division protein FtsI; penicillin-binding protein 3
b0085	murE	93166	94653	forward	UDP-N-acetylmuramoylalanyl-D-glutamate 2,6-diaminopimelate ligase
b0086	murF	94650	96008	forward	D-alanyl-D-alanine-adding enzyme
b0087	mraY	96002	97084	forward	phospho-N-acetylmuramoyl-pentapeptide transferase
b0088	murD	97087	98403	forward	UDP-<i>N</i>-acetylmuramoyl-L-alanine:D-glutamate ligase
b0089	ftsW	98403	99647	forward	essential cell division protein FtsW; lipid II flippase
b0090	murG	99644	100711	forward	N-acetylglucosaminyl transferase
b0091	murC	100765	102240	forward	UDP-N-acetylmuramate-alanine ligase
b0092	ddlB	102233	103153	forward	ddlB
b0093	ftsQ	103155	103985	forward	essential cell division protein FtsQ
b0094	ftsA	103982	105244	forward	essential cell division protein FtsA
b0095	ftsZ	105305	106456	forward	essential cell division protein FtsZ
b0096	lpxC	106557	107474	forward	UDP-3-O-acyl-N-acetylglucosamine deacetylase
b0097	secM	107705	108217	forward	secretion monitor that regulates SecA translation (General Secretory Pathway)
b0098	secA	108279	110984	forward	SecA
b0099	mutT	111044	111433	forward	dGTP pyrophosphohydrolase
b0100	b0100	111564	111698	reverse
b0101	yacG	111649	111846	reverse	DNA gyrase inhibitor YacG
b0102	yacF	111856	112599	reverse	conserved protein
b0103	coaE	112599	113219	reverse	dephospho-CoA kinase
b0104	guaC	113444	114487	forward	GuaC
b0105	b0105	114407	114514	reverse
b0106	hofC	114522	115724	reverse	protein transport protein HofC
b0107	hofB	115714	117099	reverse	protein involved in plasmid replication
b0108	ppdD	117109	117549	reverse	prepilin peptidase dependent protein
b0109	nadC	117752	118645	reverse	quinolinate phosphoribosyltransferase (decarboxylating) monomer
b0110	ampD	118733	119284	forward	N-acetyl-anhydromuramyl-L-alanine-amidase
b0111	ampE	119281	120135	forward	predicted inner membrane protein
b0112	aroP	120178	121551	reverse	AroP phenylalanine/tyrosine/tryptophan APC transporter
b0113	pdhR	122092	122856	forward	PdhR DNA-binding transcriptional dual regulator
b0114	aceE	123017	125680	forward	subunit of E1p component of pyruvate dehydrogenase complex
b0116	lpd	127912	129336	forward	E3 monomer
b0117	yacH	129407	131260	reverse	putative membrane protein
b0118	acnB	131615	134212	forward	bifunctional aconitate hydratase 2 and 2-methylisocitrate dehydratase
b0119	yacL	134388	134750	forward	conserved protein
b0120	speD	134788	135582	reverse	adenosylmethionine decarboxylase, proenzyme
b0121	speE	135598	136464	reverse	SpeE
b0122	yacC	136570	136917	reverse	predicted protein
b0123	cueO	137083	138633	forward	multicopper oxidase with role in copper homeostasis
b0124	gcd	138835	141225	reverse	glucose dehydrogenase
b0125	hpt	141431	141967	forward	hypoxanthine-guanine phosphoribosyltransferase
b0126	can	142008	142670	reverse	carbonic anhydrase 2 monomer
b0127	yadG	142779	143705	forward	YadG
b0128	yadH	143702	144472	forward	YadH
b0129	yadI	144577	145017	forward	AgaX
b0130	yadE	145081	146310	forward	predicted polysaccharide deacetylase lipoprotein
b0131	panD	146314	146694	reverse	PanD proenzyme, &pi; protein
b0132	yadD	146968	147870	forward	predicted transposase
b0133	panC	147944	148795	reverse	pantothenate synthetase monomer
b0134	panB	148807	149601	reverse	3-methyl-2-oxobutanoate hydroxymethyltransferase monomer
b0142	folK	157253	157732	reverse	6-hydroxymethyl-7,8-dihydropterin pyrophosphokinase
b0143	pcnB	157729	159126	reverse	poly(A) polymerase I
b0144	yadB	159186	160112	reverse	glutamyl-Q tRNA(Asp) synthetase
b0145	dksA	160149	160604	reverse	RNA polymerase-binding transcription factor
b0146	sfsA	160782	161486	reverse	predicted DNA-binding transcriptional regulator of maltose metabolism
b0147	ligT	161501	162031	reverse	2'-5' RNA ligase
b0148	hrpB	162105	164534	forward	predicted ATP-dependent helicase
b0149	mrcB	164730	167264	forward	MrcB
b0150	fhuA	167484	169727	forward	FhuA outer membrane protein receptor for ferrichrome, colicin M, and phages T1, T5, and phi80
b0151	fhuC	169778	170575	forward	FhuC
b0152	fhuD	170575	171465	forward	FhuD
b0153	fhuB	171462	173444	forward	FhuB
b0154	hemL	173602	174882	reverse	glutamate-1-semialdehyde aminotransferase
b0155	clcA	175107	176528	forward	ClcA chloride/proton antiporter
b0156	erpA	176610	176954	forward	essential respiratory protein A
b0157	yadS	177001	177624	reverse	conserved inner membrane protein
b0158	btuF	177662	178462	reverse	periplasmic vitamin B12 binding protein
b0159	mtn	178455	179153	reverse	5'-methylthioadenosine/S-adenosylhomocysteine nucleosidase monomer
b0160	dgt	179237	180754	forward	deoxyguanosine triphosphate triphosphohydrolase
b0163	yaeH	183709	184095	reverse	conserved protein
b0164	yaeI	184257	185069	reverse	phosphodiesterase
b0165	b0165	184987	185118	reverse
b0166	dapD	185123	185947	reverse	tetrahydrodipicolinate succinylase subunit
b0167	glnD	185978	188650	reverse	[protein-PII] uridylyltransferase
b0168	map	188712	189506	reverse	methionine aminopeptidase
b0169	rpsB	189874	190599	forward	30S ribosomal subunit protein S2
b0170	tsf	190857	191708	forward	protein chain elongation factor EF-Ts
b0171	pyrH	191855	192580	forward
b0172	frr	192872	193429	forward	ribosome recycling factor
b0173	dxr	193521	194717	forward	Dxr
b0174	ispU	194903	195664	forward	subunit of undecaprenyl diphosphate synthase
b0175	cdsA	195677	196534	forward	CDP-diglyceride synthetase
b0176	rseP	196546	197898	forward	RseP zinc protease, signal peptide peptidase
b0177	bamA	197928	200360	forward	BamA
b0178	hlpA	200482	200967	forward	periplasmic chaperone
b0179	lpxD	200971	201996	forward	UDP-3-O-(R-3-hydroxymyristoyl)-glucosamine <i>N</i>-acyltransferase
b0180	fabZ	202101	202556	forward	FabZ
b0181	lpxA	202560	203348	forward	LpxA
b0182	lpxB	203348	204496	forward	LpxB
b0183	rnhB	204493	205089	forward	RNAse HII, degrades RNA of DNA-RNA hybrids
b0184	dnaE	205126	208608	forward	DNA polymerase III, &alpha; subunit
b0185	accA	208621	209580	forward	acetyl-CoA carboxyltransferase, &alpha; subunit
b0187	yaeR	211877	212266	forward	predicted lyase
b0188	tilS	212331	213629	forward	tRNA<sup>Ile</sup>-lysidine synthetase
b0189	rof	213678	213932	reverse	modulator of Rho-dependent transcription termination
b4406	yaeP	213925	214125	reverse	conserved protein
b0190	yaeQ	214291	214836	forward	conserved protein
b0191	yaeJ	214833	215255	forward	peptidyl-tRNA hydrolase, ribosome rescue factor
b0192	nlpE	215269	215979	forward	outer membrane lipoprotein NlpE, involved in surface sensing
b0193	yaeF	216179	217003	reverse	predicted lipoprotein
b0194	proS	217057	218775	reverse	prolyl-tRNA synthetase
b0195	yaeB	218887	219594	reverse	conserved protein
b0196	rcsF	219591	219995	reverse	RcsF outer membrane lipoprotein
b0197	metQ	220113	220928	reverse	MetQ
b0198	metI	220968	221621	reverse	MetI
b0199	metN	221614	222645	reverse	MetN
b0200	gmhB	222833	223408	forward	D,D-heptose 1,7-bisphosphate phosphatase
b0207	dkgB	229167	229970	forward	4-nitrobenzaldehyde reductase/methylglyoxal reductase/2,5-diketo-D-gluconate reductase
b0208	yafC	229967	230881	reverse	predicted DNA-binding transcriptional regulator LYSR-type
b0209	yafD	231122	231922	forward	conserved protein
b0210	yafE	231926	232549	forward	predicted S-adenosylmethionine-dependent methyltransferase
b0211	mltD	232597	233955	reverse	MltD membrane-bound lytic murein transglycosylase D
b0212	gloB	234027	234782	reverse	glyoxalase II
b0213	yafS	234816	235538	forward	predicted S-adenosyl-L-methionine-dependent methyltransferase
b0214	rnhA	235535	236002	reverse	RNase HI, degrades RNA of DNA-RNA hybrids, participates in DNA replication
b0215	dnaQ	236067	236798	forward	DNA polymerase III, &epsilon; subunit
b0219	yafV	239419	240189	reverse	predicted C-N hydrolase family amidase, NAD(P)-binding
b0221	fadE	240859	243303	reverse	acyl-CoA dehydrogenase
b0222	lpcA	243543	244121	forward	D-sedoheptulose 7-phosphate isomerase
b0223	yafJ	244327	245094	forward	predicted amidotransferase
b0224	yafK	245065	245805	reverse	conserved protein
b0225	yafQ	245961	246239	reverse	toxin of the YafQ-DinJ toxin-antitoxin system
b0226	dinJ	246242	246502	reverse	antitoxin of YafQ-DinJ toxin-antitoxin system
b0227	yafL	246712	247461	forward	predicted lipoprotein and C40 family peptidase
b0228	yafM	247637	248134	forward	conserved protein
b0231	dinB	250898	251953	forward	DNA polymerase IV (Y-family DNA polymerase; translesion DNA synthesis)
b0232	yafN	252005	252298	forward	antitoxin of the YafO-YafN toxin-antitoxin system
b0233	yafO	252301	252699	forward	ribosome-dependent mRNA interferase, toxin of the YafO-YafN toxin-antitoxin system
b0237	pepD	254259	255716	reverse	PepD
b0238	gpt	255977	256435	forward	Gpt
b0239	frsA	256527	257771	forward	fermentation/respiration switch protein
b0240	crl	257829	258230	forward	Crl transcriptional regulator
b0245	ykfI	262552	262893	reverse	toxin of the YkfI-YafW toxin-antitoxin pair
b0246	yafW	262914	263231	reverse	antitoxin of the YkfI-YafW toxin-antitoxin pair
b4504	ykfH	263250	263471	reverse	predicted protein
b0247	ykfG	263480	263956	reverse	CP4-6 prophage; predicted DNA repair protein
b0248	yafX	263972	264430	reverse	CP4-6 prophage; predicted protein
b0249	ykfF	264528	264767	reverse	CP4-6 prophage; predicted protein
b0250	ykfB	264844	265311	reverse	CP4-6 prophage; predicted protein
b0251	yafY	265334	265777	reverse	CP4-6 prophage; inner membrane lipoprotein
b0252	yafZ	266408	267229	reverse	CP4-6 prophage; conserved protein
b0253	ykfA	267321	268184	reverse	CP4-6 prophage; predicted GTP-binding protein
b0254	perR	268513	269406	reverse	PerR transcriptional regulator
b0255	insN-1	269466	269870	forward	CP4-6 prophage; partial regulator of insertion element IS911A
b0256	insI-1	269827	270978	forward	transposase of IS30
b0257	insO-1	271054	271479	forward	CP4-6 prophage; partial transposase of insertion element IS911A, interrupted by insertion of IS30 element
b0258	ykfC	272071	273216	forward	CP4-6 prophage; conserved protein
b0259	insH-1	273325	274341	reverse	IS5 transposase and trans-activator
b0260	mmuP	274549	275952	forward	MmuP APC transporter
b0261	mmuM	275939	276871	forward	homocysteine methyltransferase
b0262	afuC	276980	278026	reverse	CP4-6 prophage; predicted ferric transporter subunit/ATP-binding component of ABC superfamily
b0263	afuB	278038	278400	reverse	AfuB
b4505	ykgN	279248	279586	reverse	predicted IS protein
b0266	yagB	279609	279959	reverse	CP4-6 prophage; conserved protein
b0267	yagA	280053	281207	reverse	CP4-6 prophage; predicted DNA-binding transcriptional regulator
b0268	yagE	281481	282410	forward	CP4-6 prophage; probable 2-keto-3-deoxygluconate aldolase
b0269	yagF	282425	284392	forward	CP4-6 prophage; predicted dehydratase
b0270	yagG	284619	286001	forward	YagG GPH Transporter
b0271	yagH	286013	287623	forward	putative &beta;-xylosidase
b0272	yagI	287628	288386	reverse	CP4-6 prophage; predicted DNA-binding transcriptional regulator
b0273	argF	288525	289529	reverse	ArgF
b0276	yagJ	290724	291455	forward	CP4-6 prophage; predicted protein
b0280	yagN	294363	294803	reverse	CP4-6 prophage; predicted protein
b0281	intF	294920	296320	reverse	CP4-6 prophage; predicted phage integrase
b0282	yagP	296605	297015	reverse	predicted transcriptional regulator LYSR-type
b0283	yagQ	296994	297950	reverse	conserved protein
b0284	yagR	297960	300158	reverse	aldehyde ferredoxin oxidoreductase: molybdenum cofactor-binding subunit
b0285	yagS	300155	301111	reverse	aldehyde ferredoxin oxidoreductase, FAD-binding subunit
b0286	yagT	301108	301797	reverse	aldehyde ferredoxin oxidoreductase, Fe-S subunit
b0288	ykgJ	303077	303406	reverse	predicted ferredoxin
b0289	yagV	303719	304429	reverse	conserved protein
b0290	yagW	304398	306041	reverse	predicted receptor
b0295	ykgL	311336	311563	forward	predicted protein
b4506	ykgO	311598	311738	reverse	predicted ribosomal protein
b0296	ykgM	311738	312001	reverse	predicted ribosomal protein
b0305	ykgD	319451	320305	forward	predicted DNA-binding transcriptional regulator
b0311	betA	324801	326471	reverse	choline dehydrogenase
b0312	betB	326485	327957	reverse	BetB
b0313	betI	327971	328558	reverse	BetI DNA-binding transcriptional repressor
b0314	betT	328687	330720	forward	BetT choline BCCT transporter
b0316	yahB	332725	333657	reverse	predicted DNA-binding transcriptional regulator LYSR-type
b0317	yahC	333749	334246	reverse	predicted inner membrane protein
b0322	yahH	339017	339313	forward	predicted protein
b0327	yahM	344628	344873	forward	predicted protein
b0328	yahN	344890	345561	reverse	predicted neutral amino acid efflux system
b0330	prpR	346081	347667	reverse	PrpR DNA-binding transcriptional dual regulator
b0331	prpB	347906	348796	forward
b0333	prpC	349236	350405	forward
b0334	prpD	350439	351890	forward	2-methylcitrate dehydratase
b0335	prpE	351930	353816	forward	putative propionyl-CoA synthetase
b0336	codB	354146	355405	forward	CodB cytosine NCS1 transporter
b0337	codA	355395	356678	forward
b0338	cynR	357015	357914	reverse	CynR DNA-binding transcriptional repressor
b0339	cynT	358023	358682	forward	carbonic anhydrase monomer
b0340	cynS	358713	359183	forward	cyanase monomer
b0341	cynX	359216	360370	forward	CynX cyanate MFS transporter
b0342	lacA	360473	361084	reverse	galactoside O-acetyltransferase monomer
b0345	lacI	365652	366734	reverse	LacI DNA-binding transcriptional repressor
b0346	mhpR	366811	367644	reverse	MhpR transcriptional activator
b0347	mhpA	367835	369499	forward	3-(3-hydroxyphenyl)propanoate hydroxylase
b0348	mhpB	369501	370445	forward	3-(2,3-dihydroxyphenyl)propionate dioxygenase monomer
b0349	mhpC	370448	371329	forward	2-hydroxy-6-ketonona-2,4-dienedioate hydrolase
b0350	mhpD	371339	372148	forward	2-oxopent-4-enoate hydratase
b0351	mhpF	372145	373095	forward	acetaldehyde dehydrogenase 2
b0352	mhpE	373092	374105	forward	4-hydroxy-2-ketovalerate aldolase
b0353	mhpT	374683	375894	forward	MhpT MFS transporter
b0354	yaiL	375996	376535	forward	nucleoprotein/polynucleotide-associated enzyme
b0355	frmB	376759	377592	reverse	<i>S</i>-formylglutathione hydrolase
b0356	frmA	377686	378795	reverse	FrmA
b0357	frmR	378830	379105	reverse	regulator protein
b0358	yaiO	379293	380066	reverse	outer membrane protein
b0359	yaiX	380068	380283	reverse	predicted acyl transferase (pseudogene)
b0361	insD-1	380898	381803	forward	IS2 element protein
b0369	hemB	387977	388951	reverse	porphobilinogen synthase
b0374	yaiU	392239	393642	forward	predicted protein
b0376	ampH	394354	395511	reverse	penicillin-binding protein
b0377	sbmA	395863	397083	forward	peptide antibiotic transport
b0378	yaiW	397096	398190	forward	predicted DNA-binding transcriptional regulator
b0379	yaiY	398249	398557	reverse	inner membrane protein
b0380	yaiZ	398817	399029	forward	predicted inner membrane protein
b0381	ddlA	399053	400147	reverse	D-alanine-D-alanine ligase A
b0384	psiF	402505	402825	forward	conserved protein
b0385	adrA	402927	404042	forward	predicted diguanylate cyclase
b0386	proC	404059	404868	reverse	pyrroline-5-carboxylate reductase monomer
b0387	yaiI	404988	405446	forward	conserved protein
b0388	aroL	405629	406153	forward	shikimate kinase II
b0389	yaiA	406203	406394	forward	predicted protein
b0390	aroM	406652	407329	forward	conserved protein
b0391	yaiE	407401	407685	forward	conserved protein
b0393	rdgC	408332	409243	reverse	RdgC
b0394	mak	409368	410276	forward	manno(fructo)kinase
b0396	araJ	410521	411705	reverse	AraJ MFS transporter
b0397	sbcC	411831	414977	reverse	ATP-dependent dsDNA exonuclease
b0398	sbcD	414974	416176	reverse	ATP-dependent dsDNA exonuclease
b0399	phoB	416366	417055	forward	PhoB transcriptional dual regulator
b0400	phoR	417113	418408	forward	PhoR
b0401	brnQ	418815	420134	forward	BrnQ branched chain amino acid LIVCS transporter
b0402	proY	420210	421583	forward	ProY cryptic proline APC transporter
b0403	malZ	421739	423556	forward	maltodextrin glucosidase
b0404	acpH	423561	424142	reverse	acyl carrier protein phosphodiesterase
b0405	queA	424235	425305	forward	S-adenosylmethionine:tRNA ribosyltransferase-isomerase
b0406	tgt	425361	426488	forward	tRNA-guanine transglycosylase monomer
b0407	yajC	426511	426843	forward	YajC
b0408	secD	426871	428718	forward	SecD
b0409	secF	428729	429700	forward	SecF
b0410	yajD	429829	430176	forward	conserved protein
b0412	yajI	431536	432075	reverse	predicted lipoprotein
b0413	nrdR	432226	432675	forward	NrdR
b0414	ribD	432679	433782	forward	fused diaminohydroxyphosphoribosylaminopyrimidine deaminase / 5-amino-6-(5-phosphoribosylamino)uracil reductase
b0415	ribE	433871	434341	forward	RibE
b0416	nusB	434361	434780	forward	transcription antitermination protein NusB
b0417	thiL	434858	435835	forward	thiamine monophosphate kinase
b0418	pgpA	435813	436331	forward	phosphatidylglycerophosphatase A
b0420	dxs	437539	439401	reverse	Dxs
b0421	ispA	439426	440325	reverse	geranyl diphosphate synthase/farnesyl diphosphate synthase
b0422	xseB	440325	440567	reverse	exonuclease VII, small subunit
b0423	thiI	440773	442221	forward	ThiI
b0424	yajL	442275	442865	reverse	chaperone, protecting proteins in response to oxidative stress
b0425	panE	442828	443739	reverse	2-dehydropantoate 2-reductase
b0426	yajQ	443907	444398	forward	nucleotide binding protein
b0427	yajR	444526	445890	reverse	YajR MFS transporter
b0429	cyoD	446941	447270	reverse	cytochrome <i>bo</i> terminal oxidase subunit IV
b0430	cyoC	447270	447884	reverse	cytochrome <i>bo</i> terminal oxidase subunit III
b0431	cyoB	447874	449865	reverse	cytochrome <i>bo</i> terminal oxidase subunit I
b0432	cyoA	449887	450834	reverse	cytochrome <i>bo</i> terminal oxidase subunit II
b0433	ampG	451294	452769	reverse	AmpG muropeptide MFS transporter
b0434	yajG	452813	453391	reverse	predicted lipoprotein
b0435	bolA	453696	454013	forward	BolA DNA-binding transcriptional dual regulator
b0436	tig	454357	455655	forward	trigger factor; a molecular chaperone involved in cell division
b0437	clpP	455901	456524	forward	ClpP
b0438	clpX	456650	457924	forward	ClpX
b0439	lon	458112	460466	forward	Lon
b0440	hupB	460675	460947	forward	transcriptional dual regulator HU-&beta;, NS1 (HU-1)
b0441	ppiD	461139	463010	forward	periplasmic folding helper protein
b0442	ybaV	463161	463532	forward	conserved protein
b0443	fadM	463626	464024	forward	thioesterase III
b0444	queC	464076	464771	reverse	7-cyano-7-deazaguanine synthase
b0445	ybaE	464836	466536	reverse	predicted transporter subunit: periplasmic-binding component of ABC superfamily
b0446	cof	466636	467454	forward	pyridoxal phosphatase/HMP-PP hydrolase
b0447	ybaO	467607	468065	forward	putative LRP-like transcriptional regulator
b0448	mdlA	468095	469867	forward	predicted multidrug transporter subunit of ABC superfamily: ATP-binding component
b0449	mdlB	469860	471641	forward	predicted multidrug transporter subunit of ABC superfamily: ATP-binding component
b0450	glnK	471822	472160	forward	GlnK
b0451	amtB	472190	473476	forward	AmtB
b0452	tesB	473525	474385	reverse	TesB
b0453	ybaY	474603	475175	forward	predicted outer membrane lipoprotein
b0454	atl	475206	475595	reverse	DNA base-flipping protein
b0456	ybaA	475896	476249	forward	conserved protein
b0457	ylaB	476291	477841	reverse	conserved inner membrane protein
b0458	ylaC	478005	478475	reverse	predicted inner membrane protein
b0462	acrB	480478	483627	reverse	AcrB RND-type permease
b0463	acrA	483650	484843	reverse	AcrA membrane fusion protein
b0464	acrR	484985	485632	forward	AcrR DNA-binding transcriptional repressor
b0465	kefA	485760	489122	forward	KefA
b0466	ybaM	489334	489495	reverse	small protein involved in the cell envelope stress response
b0467	priC	489509	490036	reverse	primosomal replication protein N''
b0468	ybaN	490106	490483	forward	conserved inner membrane protein
b0469	apt	490636	491187	forward	adenine phosphoribosyltransferase
b0470	dnaX	491316	493247	forward	DNA polymerase III, &gamma; subunit
b0471	ybaB	493300	493629	forward	conserved DNA-binding protein
b0472	recR	493629	494234	forward	recombination and repair
b0474	adk	496399	497043	forward	adenylate kinase
b0475	hemH	497279	498241	forward	ferrochelatase
b0476	aes	498238	499197	reverse	acetyl esterase
b0477	gsk	499349	500653	forward
b0478	ybaL	500786	502462	reverse	YbaL CPA2 transporter
b0479	fsr	502700	503920	reverse	Fsr fosmidomycin MFS transporter
b0480	ushA	504138	505790	forward	5'-nucleotidase/UDP-sugar hydrolase
b0481	ybaK	505827	506306	reverse	Cys-tRNA<sup>Pro</sup> and Cys-tRNA<sup>Cys</sup> deacylase
b0482	ybaP	506510	507304	reverse	conserved protein
b0483	ybaQ	507442	507783	forward	predicted DNA-binding transcriptional regulator
b0484	copA	508099	510603	reverse	Cu<sup>+</sup>-exporting ATPase
b0487	cueR	513217	513624	forward	CueR transcriptional dual regulator
b0488	ybbJ	513625	514083	reverse	conserved inner membrane protein
b0489	qmcA	514080	514997	reverse	predicted protease, membrane anchored
b0492	ybbN	516649	517503	reverse	chaperone and weak protein oxidoreductase
b0493	ybbO	517564	518373	reverse	predicted oxidoreductase with NAD(P)-binding Rossmann-fold domain
b0494	tesA	518363	518989	reverse
b0495	ybbA	518957	519643	forward	YbbA
b0496	ybbP	519640	522054	forward	YbbP
b0503	ybbB	529356	530450	reverse	tRNA 2-selenouridine synthase
b0504	allS	530519	531445	reverse	AllS transcriptional activator
b0505	allA	531675	532157	forward	ureidoglycolate lyase
b0506	allR	532235	533050	forward	AllR DNA-binding transcriptional repressor
b0507	gcl	533140	534921	forward	Gcl
b0508	hyi	534934	535710	forward
b0509	glxR	535810	536688	forward	tartronate semialdehyde reductase 2
b0510	ybbV	536720	536998	forward	predicted protein
b0522	purK	550750	551817	reverse	N5-carboxyaminoimidazole ribonucleotide synthetase monomer
b0523	purE	551814	552323	reverse	PurE
b0524	lpxH	552441	553163	reverse	UDP-2,3-diacylglucosamine hydrolase
b0525	ppiB	553166	553660	reverse	peptidyl-prolyl <i>cis-trans</i> isomerase B (rotamase B)
b0526	cysS	553834	555219	forward	cysteinyl-tRNA synthetase
b0527	ybcI	555255	555776	reverse	conserved inner membrane protein
b0528	ybcJ	555884	556096	reverse	predicted RNA-binding protein
b0529	folD	556098	556964	reverse
b0537	intD	564038	565201	reverse	DLP12 prophage; predicted integrase
b0539	ybcC	565321	565584	reverse	DLP12 prophage; predicted exonuclease
b0541	insF-3	566361	567227	forward
b0542	renD	567285	567470	forward	DLP12 prophage; predicted protein
b4588	ylcH	571591	571692	forward	DLP12 prophage; hypothetical protein
b0547	ybcN	571689	572144	forward	DLP12 prophage; DNA base-flipping protein
b0548	ninE	572144	572314	forward	DLP12 prophage, conserved protein similar to phage 82 and lambda proteins
b0549	ybcO	572307	572597	forward	DLP12 prophage; predicted protein
b0550	rusA	572594	572956	forward	endodeoxyribonuclease RUS (Holliday junction resolvase)
b4509	ylcG	572953	573093	forward	DLP12 prophage; small protein
b0551	ybcQ	573179	573562	forward	DLP12 prophage; predicted antitermination protein
b0552	insH-2	573960	574976	reverse
b0553	nmpC	574981	576048	reverse	outer membrane porin protein; locus of qsr prophage
b0554	essD	576621	576836	forward	DLP12 prophage; predicted phage lysis protein
b0555	ybcS	576836	577333	forward	DLP12 prophage; lysozyme
b0556	rzpD	577330	577791	forward	DLP12 prophage; predicted murein endopeptidase
b4510	rzoD	577550	577732	forward	DLP12 prophage; predicted lipoprotein
b4589	ylcI	579474	579668	reverse	hypothetical protein
b0560	nohB	580057	580602	forward	DLP12 prophage; DNA packaging protein
b0561	tfaD	580757	581320	forward	DLP12 prophage; predicted tail fiber assembly protein
b0562	ybcY	581375	581959	reverse	DLP12 prophage; predicted SAM-dependent methyltransferase
b0563	tfaX	582098	582283	forward	DLP12 prophage; predicted protein
b0566	envY	585370	586131	reverse	EnvY DNA-binding transcriptional activator
b0567	ybcH	586314	587204	reverse	predicted protein
b0568	nfrA	587205	590177	reverse	bacteriophage N4 receptor, outer membrane protein
b0569	nfrB	590164	592401	reverse	bacteriophage N4 receptor, inner membrane subunit
b0570	cusS	592551	593993	reverse	CusS sensory histidine kinase
b0571	cusR	593983	594666	reverse	CusR
b0572	cusC	594823	596196	forward	outer membrane factor of the CusCFBA copper/silver efflux system
b0573	cusF	596354	596686	forward	periplasmic copper/silver-binding protein
b0574	cusB	596702	597925	forward	membrane fusion protein of the CusCFBA copper efflux system
b0575	cusA	597937	601080	forward	CusA
b0576	pheP	601182	602558	forward	PheP phenylalanine APC transporter
b0577	mscM	602639	603886	reverse	mechanosensitive channel of miniconductance
b0578	nfsB	603994	604647	reverse	dihydropteridine reductase monomer
b0579	ybdF	604741	605109	reverse	conserved protein
b0580	ybdJ	605174	605422	reverse	predicted inner membrane protein
b0581	ybdK	605488	606606	reverse	carboxylate-amine ligase
b4415	hokE	607059	607211	forward	HokE
b0583	entD	608682	609311	reverse	phosphopantetheinyl transferase/phosphopantetheinyl transferase
b0584	fepA	609477	611717	reverse	FepA, outer membrane receptor for ferric enterobactin (enterochelin) and colicins B and D
b0585	fes	612038	613162	forward	enterochelin esterase
b4511	ybdZ	613165	613383	forward	conserved protein
b0586	entF	613380	617261	forward	apo-serine activating enzyme
b0588	fepC	618607	619422	reverse	FepC
b0589	fepG	619419	620411	reverse	FepG
b0590	fepD	620408	621412	reverse	FepD
b0591	entS	621523	622773	forward	EntS MFS transporter
b0592	fepB	622777	623733	reverse	FepB
b0593	entC	624108	625283	forward	isochorismate synthase 1
b0594	entE	625293	626903	forward	EntE
b0595	entB	626917	627774	forward	EntB monomer
b0596	entA	627774	628520	forward	EntA
b0597	entH	628523	628936	forward	proofreading thioesterase in enterobactin biosynthesis
b0598	cstA	629117	631222	forward	peptide transporter induced by carbon starvation
b4512	ybdD	631405	631602	forward	conserved protein
b0599	ybdH	631612	632700	reverse	predicted oxidoreductase
b0600	ybdL	632809	633969	forward	methionine-oxo-acid transaminase, PLP-dependent
b0604	dsbG	637050	637796	reverse	DsbG<SUB>reduced</SUB>
b0606	ahpF	638976	640541	forward	AhpF component
b0607	uspG	640662	641090	reverse	universal stress protein UP12
b0608	ybdR	641311	642549	forward	predicted oxidoreductase, Zn-dependent and NAD(P)-binding
b0610	rnk	642780	643190	reverse	regulator of nucleoside diphosphate kinase
b0611	rna	643420	644226	reverse	RNase I, cleaves phosphodiester bond between any two nucleotides
b0623	cspE	656515	656724	forward	transcription antiterminator and regulator of RNA stability
b0624	crcB	656778	657161	reverse	protein involved in resistance to camphor-induced chromosome decondensation
b0625	ybeM_1	657254	657481	forward	predicted protein of C-N hydrolase superfamily, N-terminal fragment
b0626	ybeM_2	657478	658041	forward	predicted protein of C-N hydrolase superfamily, C-terminal fragment
b0627	tatE	658170	658373	forward	TatE
b0628	lipA	658474	659439	reverse	lipoate synthase monomer
b0630	lipB	660860	661501	reverse	lipoyl(octanoyl) transferase
b0631	ybeD	661602	661865	reverse	conserved protein
b0632	dacA	661975	663186	reverse	D-alanyl-D-alanine carboxypeptidase, fraction A; penicillin-binding protein 5
b0633	rlpA	663325	664413	reverse	rare lipoprotein RlpA
b0634	mrdB	664424	665536	reverse	rod shape-determining membrane protein; sensitivity to radiation and drugs
b0635	mrdA	665539	667440	reverse	cell shape; peptidoglycan synthetase; penicillin-binding protein 2
b0636	rlmH	667471	667938	reverse	23S rRNA m<sup>3</sup>&Psi;1915 methyltransferase
b0637	ybeB	667942	668259	reverse	predicted protein
b0638	cobC	668519	669130	reverse	predicted adenosylcobalamin phosphatase/&alpha;-ribazole phosphatase
b0639	nadD	669154	669795	reverse	nicotinate-mononucleotide adenylyltransferase
b0640	holA	669797	670828	reverse	DNA polymerase III, &delta; subunit
b0641	lptE	670828	671409	reverse	rare lipoprotein LptE
b0642	leuS	671424	674006	reverse	leucyl-tRNA synthetase
b0643	ybeL	674241	674723	forward	conserved protein
b0644	ybeQ	674793	675770	reverse	conserved protein
b0651	rihA	682700	683635	reverse	ribonucleoside hydrolase 1 (pyrimidine-specific)
b0652	gltL	683753	684478	reverse	GltL
b0653	gltK	684478	685152	reverse	GltK
b0654	gltJ	685152	685892	reverse	GltJ
b0655	gltI	686062	686970	reverse	GltI
b0656	insH-3	687220	688236	reverse
b0657	lnt	688566	690104	reverse	apolipoprotein N-acyltransferase
b0658	ybeX	690129	691007	reverse	predicted ion transport protein
b0659	ybeY	691097	691564	reverse	conserved protein involved in translation
b0660	ybeZ	691561	692640	reverse	predicted protein with nucleoside triphosphate hydrolase domain
b0661	miaB	692754	694178	reverse	isopentenyl-adenosine A37 tRNA methylthiolase MiaB
b0662	ubiF	694324	695499	forward	2-octaprenyl-3-methyl-6-methoxy-1,4-benzoquinone hydroxylase
b0674	asnB	696736	698400	reverse	AsnB
b0675	nagD	698797	699549	reverse	ribonucleotide monophosphatase
b0676	nagC	699597	700817	reverse	NagC DNA-binding transcriptional dual regulator
b0677	nagA	700826	701974	reverse	NagA
b0679	nagE	703167	705113	forward	NagE
b0680	glnS	705316	706980	forward	glutaminyl-tRNA synthetase
b0681	chiP	707557	708963	forward	ChiP
b0682	ybfN	709013	709339	forward	predicted lipoprotein
b0683	fur	709423	709869	reverse	Fur
b4637	uof	709862	709948	reverse	RyhB-regulated <i>fur</i> leader peptide
b0684	fldA	710158	710688	reverse	flavodoxin 1
b0685	ybfE	710828	711121	reverse	LexA-regulated protein
b0686	ybfF	711261	712025	reverse	esterase
b0687	seqA	712210	712755	forward	SeqA, negative modulator of initiation of replication
b0688	pgm	712781	714421	forward	phosphoglucomutase
b0694	kdpE	720279	720956	reverse	KdpE transcriptional activator
b0695	kdpD	720953	723637	reverse	KdpD
b0696	kdpC	723630	724202	reverse	KdpC
b0697	kdpB	724211	726259	reverse	KdpB
b0698	kdpA	726282	727955	reverse	KdpA
b4513	kdpF	727955	728044	reverse
b0699	ybfA	728357	728563	forward	predicted protein
b0709	dtpD	740298	741779	reverse	DtpD peptide POT Transporter
b0710	ybgI	742050	742793	forward	conserved metal-binding protein
b0711	ybgJ	742816	743472	forward	putative carboxylase
b0712	ybgK	743466	744398	forward	putative carboxylase
b0713	ybgL	744388	745122	forward	predicted lactam utilization protein
b0714	nei	745158	745949	forward	endonuclease VIII
b0715	abrB	745946	746992	reverse	predicted regulator
b0716	ybgO	747144	748205	reverse	predicted fimbrial-like adhesin protein
b0717	ybgP	748202	748930	reverse	putative fimbrial chaperone
b0720	gltA	752408	753691	reverse	citrate synthase monomer
b0721	sdhC	754400	754789	forward	succinate dehydrogenase membrane protein
b0722	sdhD	754783	755130	forward	succinate dehydrogenase membrane protein
b0723	sdhA	755130	756896	forward	succinate dehydrogenase flavoprotein
b0724	sdhB	756912	757628	forward	succinate dehydrogenase iron-sulfur protein
b0725	b0725	757687	757947	forward
b0726	sucA	757929	760730	forward	subunit of E1(0) component of 2-oxoglutarate dehydrogenase
b0727	sucB	760745	761962	forward	SucB
b0728	sucC	762237	763403	forward	succinyl-CoA synthetase, &beta; subunit
b0729	sucD	763403	764272	forward	succinyl-CoA synthetase, &alpha; subunit
b0730	mngR	764376	765098	reverse	MngR
b0731	mngA	765207	767183	forward	MngA
b0732	mngB	767201	769834	forward	&alpha;-mannosidase
b0733	cydA	770681	772249	forward	cytochrome <i>bd</i>-I terminal oxidase subunit I
b0734	cydB	772265	773404	forward	cytochrome <i>bd</i>-I terminal oxidase subunit II
b4515	ybgT	773419	773532	forward	small membrane protein
b0735	ybgE	773532	773825	forward	putative lipoprotein
b0736	ybgC	773975	774379	forward	esterase/thioesterase
b0737	tolQ	774376	775068	forward	TolQ
b0738	tolR	775072	775500	forward	TolR
b0739	tolA	775565	776830	forward	TolA
b0740	tolB	776963	778255	forward	TolB
b0741	pal	778290	778811	forward	Pal
b0742	ybgF	778821	779612	forward	predicted periplasmic protein
b0750	nadA	781308	782351	forward
b0751	pnuC	782389	783108	forward	PnuC NMN transporter
b0752	zitB	783105	784046	reverse	ZitB zinc CDF transporter
b0753	ybgS	784160	784540	reverse	conserved protein
b0754	aroG	784856	785908	forward	AroG
b0756	galM	787020	788060	reverse	galactose-1-epimerase
b0757	galK	788054	789202	reverse	galactokinase
b0758	galT	789206	790252	reverse	galactose-1-phosphate uridylyltransferase
b0759	galE	790262	791278	reverse	UDP-glucose 4-epimerase monomer
b0760	modF	791539	793011	reverse	ModF
b0761	modE	793079	793867	reverse	ModE
b0762	ybhT	793996	794145	forward	small membrane protein involved in the cell envelope stress response
b0763	modA	794312	795085	forward	ModA
b0764	modB	795085	795774	forward	ModB
b0765	modC	795777	796835	forward	ModC
b0766	ybhA	796836	797654	reverse	pyridoxal phosphatase/fructose 1,6-bisphosphatase
b0772	ybhC	805221	806504	reverse	outer membrane lipoprotein
b0774	bioA	807191	808480	reverse	adenosylmethionine-8-amino-7-oxononanoate aminotransferase monomer
b0775	bioB	808567	809607	forward	biotin synthase monomer
b0776	bioF	809604	810758	forward	8-amino-7-oxononanoate synthase monomer
b0777	bioC	810745	811500	forward	malonyl-CoA methyltransferase
b0778	bioD	811493	812170	forward	dethiobiotin synthetase monomer
b4591	ybhU	812337	812474	reverse
b0779	uvrB	812749	814770	forward	DNA repair; excision nuclease subunit B
b0780	ybhK	814962	815870	reverse	predicted transferase with NAD(P)-binding Rossmann-fold domain
b0781	moaA	816267	817256	forward	molybdopterin biosynthesis protein A
b0782	moaB	817278	817790	forward	MoaB subunit
b0783	moaC	817793	818278	forward	MoaC monomer
b0784	moaD	818271	818516	forward	molybdopterin synthase small subunit
b0785	moaE	818518	818970	forward	molybdopterin synthase large subunit
b0786	ybhL	819107	819811	forward	predicted inner membrane protein
b0788	ybhN	820765	821721	reverse	conserved inner membrane protein; predicted DNA-binding transcriptional regulator
b0791	ybhQ	823853	824263	forward	predicted inner membrane protein
b0792	ybhR	824225	825331	reverse	YbhR
b0793	ybhS	825342	826475	reverse	YbhS
b0794	ybhF	826468	828204	reverse	YbhF
b0795	ybhG	828197	829195	reverse	predicted membrane fusion protein
b0796	ybiH	829195	829866	reverse	predicted DNA-binding transcriptional regulator
b0797	rhlE	830095	831459	forward	ATP-dependent RNA helicase
b0798	ybiA	831691	832173	reverse	conserved protein
b0799	dinG	832293	834443	forward	ATP-dependent helicase
b0800	ybiB	834471	835433	forward	predicted transferase/phosphorylase
b0801	ybiC	835574	836659	forward	predicted dehydrogenase
b0802	ybiJ	836888	837148	reverse	predicted protein
b0803	ybiI	837413	837679	reverse	conserved protein
b0804	ybiX	837753	838430	reverse	conserved protein
b0805	fiu	838472	840754	reverse	putative outer membrane receptor for iron transport
b0806	mcbA	841019	841279	reverse	protein involved in colanic acid production
b0807	rlmF	841555	842481	forward	23S rRNA m<sup>6</sup>A1618 methyltransferase
b0808	ybiO	842478	844703	reverse	predicted mechanosensitive channel
b0809	glnQ	844964	845686	reverse	GlnQ
b0810	glnP	845683	846342	reverse	GlnP
b0811	glnH	846481	847227	reverse	GlnH
b0813	rhtA	848433	849320	reverse	threonine and homoserine exporter
b0815	ybiP	850237	851820	reverse	predicted hydrolase, inner membrane
b0816	yliL	851894	852163	forward	predicted protein
b0817	mntR	852406	852873	forward	MntR
b0818	ybiR	852870	853988	forward	predicted transporter
b0819	ybiS	854047	854967	reverse	L,D-transpeptidase YbiS
b0820	ybiT	855186	856778	forward	putative ATP-binding component of a transport system
b0821	ybiU	857019	858284	reverse	predicted protein
b0822	ybiV	858436	859251	reverse	sugar phosphatase
b0823	ybiW	859397	861829	reverse	predicted pyruvate formate lyase
b0824	ybiY	861835	862761	reverse	predicted pyruvate formate lyase activating enzyme
b0825	fsaA	862865	863527	forward	Fsa
b0826	moeB	863603	864352	reverse	molybdopterin-synthase adenylyltransferase
b0827	moeA	864352	865587	reverse	molybdopterin biosynthesis
b0828	iaaA	865791	866756	forward	asparaginase III
b0829	gsiA	866776	868614	forward	GsiA
b0830	gsiB	868634	870172	forward	GsiB
b0831	gsiC	870190	871110	forward	GsiC
b0832	gsiD	871113	872024	forward	GsiD
b0835	rimO	875933	877258	reverse	ribosomal protein S12 D88 methylthiotransferase
b0836	bssR	877471	877854	forward	regulator of biofilm formation
b0837	yliI	877965	879080	forward	aldose sugar dehydrogenase
b0838	gstB	879077	879703	reverse	glutathione S-transferase B
b0839	dacC	879950	881152	forward	penicillin-binding protein 6
b0840	deoR	881199	881957	reverse	DeoR DNA-binding transcriptional repressor
b0841	ybjG	882015	882611	reverse	undecaprenyl pyrophosphate phosphatase
b0842	cmr	882896	884128	forward	MdfA/Cmr MFS multidrug transporter
b0843	ybjH	884169	884453	reverse	predicted protein
b0844	ybjI	884539	885354	reverse	FMN phosphatase
b0845	ybjJ	885354	886562	reverse	predicted transporter
b0846	ybjK	886646	887182	forward	predicted DNA-binding transcriptional regulator
b0847	ybjL	887357	889042	reverse	predicted transporter
b0848	ybjM	889312	889689	forward	predicted inner membrane protein
b0849	grxA	889719	889976	reverse	reduced glutaredoxin 1
b0850	ybjC	890136	890423	forward	predicted inner membrane protein
b0851	nfsA	890407	891129	forward	NADPH nitroreductase monomer
b0852	rimK	891190	892092	forward	ribosomal protein S6 modification protein
b0853	ybjN	892180	892656	forward	predicted oxidoreductase
b0854	potF	893007	894119	forward	PotF
b0855	potG	894214	895347	forward	PotG
b0856	potH	895357	896310	forward	PotH
b0857	potI	896307	897152	forward	PotI
b0858	ybjO	897212	897700	forward	predicted inner membrane protein
b0859	rlmC	897741	898868	forward	23S rRNA m<sup>5</sup>U747 methyltransferase
b0860	artJ	899067	899798	reverse	ArtJ
b0861	artM	900089	900757	reverse	ArtM
b0862	artQ	900757	901473	reverse	ArtQ
b0863	artI	901480	902211	reverse	ArtI
b0864	artP	902229	902957	reverse	ArtP
b0866	ybjQ	903816	904139	forward	conserved protein
b0867	amiD	904136	904966	forward	anhydro-N-acetylmuramoyl-L-alanine amidase
b0868	ybjS	904963	905976	reverse	predicted NAD(P)H-binding oxidoreductase with NAD(P)-binding Rossmann-fold domain
b0869	ybjT	906075	907505	reverse	conserved protein with NAD(P)-binding Rossmann-fold domain
b0870	ltaE	907516	908517	reverse	LtaE
b0874	ybjE	913181	914080	reverse	predicted transporter
b0877	ybjX	917351	918307	reverse	conserved protein
b0878	macA	918458	919573	forward	MacA
b0879	macB	919570	921516	forward	MacB
b0880	cspD	921589	921813	reverse	DNA replication inhibitor
b0881	clpS	922136	922456	forward	specificity factor for ClpA-ClpP chaperone-protease complex
b0882	clpA	922487	924763	forward	ClpA
b0884	infA	925448	925666	reverse	protein chain initiation factor IF-1
b0885	aat	925951	926655	reverse	leucyl, phenylalanyl-tRNA-protein transferase
b0886	cydC	926697	928418	reverse	CydC
b0887	cydD	928419	930185	reverse	CydD
b0888	trxB	930308	931273	reverse	thioredoxin reductase monomer
b0889	lrp	931818	932312	forward	Lrp transcriptional dual regulator
b0890	ftsK	932447	936436	forward	essential cell division protein FtsK
b0891	lolA	936592	937206	forward	periplasmic chaperone, effects translocation of lipoproteins from inner membrane to outer
b0892	rarA	937217	938560	forward	recombination factor
b0893	serS	938651	939943	forward	seryl-tRNA synthetase
b0894	dmsA	940182	942626	forward	dimethyl sulfoxide reductase, chain A
b0895	dmsB	942637	943254	forward	dimethyl sulfoxide reductase, chain B
b0896	dmsC	943256	944119	forward	dimethyl sulfoxide reductase, chain C
b0897	ycaC	944154	944780	reverse	predicted hydrolase monomer
b0898	ycaD	945094	946242	forward	YcaD MFS transporter
b0902	pflA	949563	950303	reverse	pyruvate formate-lyase activating enzyme
b0903	pflB	950495	952777	reverse	PflB
b0904	focA	952832	953689	reverse	FocA formate FNT transporter
b0905	ycaO	954095	955855	reverse	protein involved in &beta;-methylthiolation of ribosomal protein S12
b0907	serC	956876	957964	forward	SerC
b0908	aroA	958035	959318	forward	3-phosphoshikimate-1-carboxyvinyltransferase
b0909	ycaL	959487	960251	forward	putative heat shock protein
b0910	cmk	960424	961107	forward	(d)CMP kinase
b0911	rpsA	961218	962891	forward	30S ribosomal subunit protein S1
b0912	ihfB	963051	963335	forward	integration host factor (IHF), &beta; subunit
b0913	ycaI	963543	965807	forward	conserved inner membrane protein
b0914	msbA	965844	967592	forward	ATP-binding lipopolysaccharide transport protein
b0915	lpxK	967589	968575	forward	tetraacyldisaccharide 4'-kinase
b0916	ycaQ	968612	969844	forward	conserved protein
b0917	ycaR	969896	970078	forward	conserved protein
b0918	kdsB	970075	970821	forward	3-deoxy-D-<i>manno</i>-octulosonate cytidylyltransferase
b0919	ycbJ	970975	971868	forward	conserved protein
b0920	ycbC	971845	972624	reverse	conserved inner membrane protein
b0921	smtA	972760	973545	forward	predicted S-adenosylmethionine-dependent methyltransferase
b0922	mukF	973542	974864	forward	Ca<sup>2+</sup>-binding protein involved in chromosome partitioning
b0923	mukE	974872	975549	forward	protein involved in chromosome partitioning
b0924	mukB	975549	980009	forward	cell division protein involved in chromosome partitioning
b0925	ycbB	980270	982117	forward	L,D-transpeptidase YcbB
b0926	ycbK	982298	982846	forward	conserved protein
b0927	ycbL	982873	983520	forward	predicted metal-binding enzyme
b0928	aspC	983742	984932	reverse	AspC
b0929	ompF	985117	986205	reverse	OmpF
b0930	asnS	986808	988208	reverse	asparaginyl-tRNA synthetase
b0931	pncB	988377	989579	reverse	nicotinate phosphoribosyltransferase
b0932	pepN	989845	992457	forward	aminopeptidase N
b0933	ssuB	992500	993267	reverse	SsuB
b0934	ssuC	993264	994055	reverse	SsuC
b0935	ssuD	994066	995211	reverse	alkanesulfonate monooxygenase
b0936	ssuA	995208	996167	reverse	SsuA
b0937	ssuE	996160	996735	reverse	NAD(P)H-dependent FMN reductase monomer
b0945	pyrD	1003991	1005001	forward	dihydroorotate dehydrogenase, type 2
b0947	ycbX	1005714	1006823	reverse	protein involved in base analog detoxification
b0948	rlmL	1007067	1009175	forward	23S rRNA m<sup>2</sup>G2445 methyltransferase
b0949	uup	1009187	1011094	forward	ATP-binding protein with possible role in replication
b0950	pqiA	1011224	1012477	forward	paraquat-inducible protein A
b0951	pqiB	1012482	1014122	forward	paraquat-inducible protein B
b0952	ymbA	1014134	1014682	forward	conserved protein
b0953	rmf	1014938	1015105	forward	ribosome modulation factor
b0954	fabA	1015175	1015693	reverse	FabA
b0955	ycbZ	1015762	1017522	reverse	putative ATP-dependent protease
b0956	matP	1017708	1018160	forward	macrodomain Ter protein
b0958	sulA	1019633	1020142	reverse	SOS cell division inhibitor
b0959	sxy	1020361	1020990	forward	transcriptional coactivator for CRP
b0960	yccS	1020953	1023106	reverse	predicted inner membrane protein
b0961	yccF	1023125	1023571	reverse	conserved inner membrane protein
b0962	helD	1023694	1025748	forward	DNA helicase IV
b0963	mgsA	1025780	1026238	reverse	methylglyoxal synthase
b0964	yccT	1026334	1026996	reverse	conserved protein
b0966	hspQ	1027627	1027944	reverse	heat shock protein, hemimethylated DNA-binding protein
b0967	rlmI	1028002	1029192	reverse	23S rRNA m<sup>5</sup>C1962 methyltransferase monomer
b0968	yccX	1029287	1029565	forward	acylphosphatase
b0969	yccK	1029562	1029891	reverse	sulfur transfer protein
b0970	yccA	1029982	1030641	reverse	putative carrier/transport protein; substrate or modulator of FtsH-mediated proteolysis
b0982	etp	1043453	1043899	reverse	phosphotyrosine-protein phosphatase
b0983	gfcE	1043887	1045026	reverse	predicted exopolysaccharide export protein
b0984	gfcD	1045072	1047168	reverse	putative lipoprotein
b0985	gfcC	1047168	1047914	reverse	conserved protein
b0986	gfcB	1047911	1048555	reverse	predicted outer membrane lipoprotein
b0987	gfcA	1048662	1048967	reverse	predicted protein
b0988	insB-4	1049250	1049753	forward	IS1 protein InsB
b0989	cspH	1050186	1050398	reverse	stress protein, member of the CspA family
b0990	cspG	1050684	1050896	forward	cold shock protein CspG
b0991	ymcE	1051070	1051300	forward	YmcE
b4517	gnsA	1051290	1051463	forward	predicted regulator of phosphatidylethanolamine synthesis
b0993	torS	1052657	1055401	reverse	TorS monomer
b0994	torT	1055484	1056512	forward	periplasmic sensory protein associated with the TorRS two-component regulatory system
b0995	torR	1056485	1057177	reverse	TorR
b0996	torC	1057307	1058479	forward	TorC trimethylamine N-oxide reductase, cytochrome c-type subunit
b0997	torA	1058479	1061025	forward	trimethylamine N-oxide reductase, catalytic subunit
b0998	torD	1061022	1061621	forward	chaperone protein for trimethylamine-N-oxide oxidoreductase I
b1004	wrbA	1066335	1066931	reverse	WrbA monomer
b4518	ymdF	1067304	1067477	forward	conserved protein
b1006	rutG	1067734	1069062	reverse	predicted xanthine/uracil transporter
b1007	rutF	1069083	1069577	reverse	flavin reductase
b1008	rutE	1069588	1070178	reverse	predicted malonic semialdehyde reductase
b1009	rutD	1070188	1070988	reverse	predicted aminoacrylate hydrolase
b1010	rutC	1070996	1071382	reverse	predicted aminoacrylate peracid reductase
b1011	rutB	1071394	1072086	reverse	peroxyureidoacrylate / ureidoacrylate amido hydrolase
b1012	rutA	1072086	1073234	reverse	pyrimidine oxygenase
b1013	rutR	1073465	1074103	forward	RutR DNA-binding transcriptional dual regulator
b1014	putA	1074143	1078105	reverse	fused PutA transcriptional repressor / proline dehydrogenase / 1-pyrroline-5-carboxylate dehydrogenase
b1015	putP	1078528	1080036	forward	PutP proline SSS transporter
b1016	efeU_1	1080579	1080689	forward	hypothetical protein of the OFeT transport family
b1018	efeO	1081466	1082593	forward	conserved protein
b1019	efeB	1082599	1083870	forward	heme-containing peroxidase/deferrochelatase
b1020	phoH	1084215	1085279	forward	ATP-binding protein
b1033	ghrA	1097109	1098047	forward	glyoxylate reductase / hydroxypyruvate reductase
b1034	ycdX	1098102	1098839	forward	predicted zinc-binding hydrolase
b1035	ycdY	1098863	1099417	forward	putative oxidoreductase component
b1036	ycdZ	1099519	1100010	forward	predicted inner membrane protein
b1043	csgC	1104184	1104516	forward	putative curli production protein
b1044	ymdA	1104637	1104948	forward	predicted protein
b1045	ymdB	1105043	1105576	forward	regulator of RNase III activity
b1046	ymdC	1105578	1106999	forward	predicted hydrolase
b1048	mdoG	1108558	1110093	forward	periplasmic glucan (MDO) biosynthesis protein
b1049	mdoH	1110086	1112629	forward	membrane glycosyltransferase; synthesis of membrane-derived oligosaccharide (MDO)
b1052	b1052	1113434	1113532	reverse
b1053	mdtG	1113487	1114713	reverse	YceE drug MFS transporter
b1054	lpxL	1114885	1115805	reverse	lauroyl acyltransferase
b1055	yceA	1116030	1117082	forward	conserved protein
b1057	yceJ	1117703	1118269	reverse	predicted cytochrome b561
b1058	yceO	1118530	1118670	reverse	small protein involved in biofilm formation and acid stress response
b1061	dinI	1120465	1120710	reverse	DNA damage-inducible protein I
b1062	pyrC	1120784	1121830	reverse	PyrC
b1063	yceB	1121936	1122496	reverse	predicted lipoprotein
b1064	grxB	1122630	1123277	reverse	reduced glutaredoxin 2
b1065	mdtH	1123341	1124549	reverse	YceL MFS transporter
b1066	rimJ	1124785	1125369	forward	ribosomal-protein-S5-alanine N-acetyltransferase
b1067	yceH	1125380	1126027	forward	conserved protein
b1068	yceM	1126029	1126952	forward	predicted oxidoreductase, NAD(P)-binding Rossmann-fold domain
b1069	murJ	1127062	1128597	forward	lipid II flippase
b1070	flgN	1128637	1129053	reverse	flagellar biosynthesis protein FlgN
b1071	flgM	1129058	1129351	reverse	anti-sigma factor for FliA (sigma 28)
b1072	flgA	1129427	1130086	reverse	flagellar biosynthesis; assembly of basal-body periplasmic P ring
b1073	flgB	1130241	1130657	forward	flagellar basal-body rod protein FlgB
b1074	flgC	1130661	1131065	forward	flagellar basal-body rod protein FlgC
b1075	flgD	1131077	1131772	forward	flagellar biosynthesis, initiation of hook assembly
b1076	flgE	1131797	1133005	forward	flagellar hook protein FlgE
b1077	flgF	1133025	1133780	forward	flagellar basal-body rod protein FlgF
b1078	flgG	1133952	1134734	forward	flagellar basal-body rod protein FlgG
b1079	flgH	1134787	1135485	forward	flagellar L-ring protein FlgH; basal-body outer-membrane L (lipopolysaccharide layer) ring protein
b1080	flgI	1135497	1136594	forward	flagellar P-ring protein FlgI
b1081	flgJ	1136594	1137535	forward	FlgJ
b1082	flgK	1137601	1139244	forward	flagellar biosynthesis, hook-filament junction protein 1
b1083	flgL	1139256	1140209	forward	flagellar biosynthesis; hook-filament junction protein
b1084	rne	1140405	1143590	reverse	RNase E
b1085	yceQ	1143725	1144045	forward	predicted protein
b1086	rluC	1144163	1145122	forward	23S rRNA pseudouridine synthase
b1087	yceF	1145234	1145818	reverse	predicted protein
b1088	yceD	1146017	1146538	forward	conserved protein
b1089	rpmF	1146590	1146763	forward	50S ribosomal subunit protein L32
b1090	plsX	1146844	1147914	forward	fatty acid/phospholipid synthesis protein
b1091	fabH	1147982	1148935	forward
b1092	fabD	1148951	1149880	forward	malonyl-CoA-ACP transacylase
b1093	fabG	1149893	1150627	forward	3-oxo-acyl-[acyl-carrier-protein] reductase
b1094	acpP	1150838	1151074	forward	apo-[acyl carrier protein]
b1095	fabF	1151162	1152403	forward	FabF
b1096	pabC	1152523	1153332	forward	pabC
b1097	yceG	1153335	1154357	forward	predicted aminodeoxychorismate lyase
b1098	tmk	1154347	1154988	forward	dTMP kinase
b1099	holB	1154985	1155989	forward	DNA polymerase III, &delta; prime subunit
b1100	ycfH	1156000	1156797	forward	predicted metallodependent hydrolase
b1101	ptsG	1157092	1158525	forward	PtsG
b1102	fhuE	1158585	1160774	reverse	outer membrane receptor for ferric iron uptake
b1105	lpoB	1161861	1162502	forward	outer membrane lipoprotein - activator of PBP1B activity
b1106	thiK	1162483	1163307	forward	thiamin kinase
b1107	nagZ	1163318	1164343	forward	&beta;-N-acetylhexosaminidase
b1108	ycfP	1164366	1164908	forward	conserved protein
b1110	ycfJ	1166822	1167361	forward	predicted protein
b1111	ycfQ	1167423	1168055	reverse	predicted DNA-binding transcriptional regulator
b1112	bhsA	1168296	1168553	forward	protein involved in stress resistance and biofilm formation
b1114	mfd	1169741	1173187	reverse	transcription-repair coupling factor
b1115	ycfT	1173315	1174388	reverse	putative transport protein
b1116	lolC	1174650	1175849	forward	LolC
b1117	lolD	1175842	1176543	forward	LolD
b1118	lolE	1176543	1177787	forward	LolE
b1119	nagK	1177816	1178727	forward	N-acetyl-D-glucosamine kinase
b1120	cobB	1178743	1179582	forward	protein deacetylase, Sir2 homolog
b1121	ycfZ	1179702	1180490	reverse	predicted inner membrane protein
b1122	ymfA	1180487	1180948	reverse	predicted inner membrane protein
b1123	potD	1181006	1182052	reverse	PotD
b1124	potC	1182049	1182843	reverse	PotC
b1125	potB	1182840	1183667	reverse	PotB
b1126	potA	1183681	1184817	reverse	PotA
b1127	pepT	1185067	1186293	forward	PepT
b1128	ycfD	1186342	1187463	reverse	conserved protein
b1129	phoQ	1187539	1188999	reverse	PhoQ sensory histidine kinase
b1130	phoP	1188999	1189670	reverse	PhoP
b1131	purB	1189839	1191209	reverse	adenylosuccinate lyase
b1132	hflD	1191213	1191854	reverse	lysogenization regulator
b1133	mnmA	1191890	1192996	reverse	tRNA (5-methylaminomethyl-2-thiouridylate)-methyltransferase
b1134	nudJ	1193050	1193511	reverse	HMP-PP hydrolase /thiamin pyrophosphate hydrolase/HMP-PP hydrolase/thiamin pyrophosphate hydrolase
b1135	rluE	1193521	1194174	reverse	23S rRNA pseudouridine 2457 synthase
b1136	icd	1194346	1195596	forward	Icd
b1140	intE	1198902	1200029	reverse	e14 prophage; predicted integrase
b1141	xisE	1200010	1200255	reverse	e14 prophage; predicted excisionase
b1142	ymfH	1200292	1200603	reverse	e14 prophage; predicted protein
b1143	ymfI	1200720	1201061	forward	e14 prophage; predicted protein
b1144	ymfJ	1200999	1201307	reverse	e14 prophage; predicted protein
b1145	ymfK	1201482	1202156	reverse	e14 prophage; predicted repressor protein
b1146	ymfT	1202247	1202447	forward	e14 prophage; predicted DNA-binding transcriptional regulator
b1147	ymfL	1202479	1203048	forward	e14 prophage; predicted DNA-binding transcriptional regulator
b1148	ymfM	1203045	1203383	forward	e14 prophage; predicted protein
b1149	ymfN	1203393	1204760	forward	e14 prophage; predicted DNA-binding transcriptional regulator
b1150	ymfR	1204772	1204954	forward	e14 prophage; predicted protein
b1151	ymfO	1204954	1205427	forward	e14 prophage; conserved protein
b1152	ymfP	1205483	1206145	forward	e14 prophage; conserved protein
b1153	ymfQ	1206136	1206720	forward	e14 prophage; conserved protein
b1154	ycfK	1206724	1207353	forward	e14 prophage; predicted protein
b1156	tfaE	1207740	1208342	reverse	e14 prophage; predicted tail fiber assembly protein
b1157	stfE	1208342	1208878	reverse	e14 prophage; predicted side tail fiber protein fragment
b1158	pinE	1208908	1209462	forward	e14 prophage; site-specific DNA recombinase
b1162	ycgE	1212551	1213282	reverse	YcgE DNA-binding transcriptional repressor
b1163	ycgF	1213487	1214698	reverse	blue light-responsive regulator of YcgE
b1164	ycgZ	1215012	1215248	forward	predicted protein
b1165	ymgA	1215291	1215563	forward	protein involved in biofilm formation
b4593	ymgI	1222213	1222386	reverse	hypothetical protein
b4594	ymgJ	1222487	1222672	forward	hypothetical protein
b4521	ymgH	1222688	1222909	forward	predicted protein
b1173	ycgI	1222918	1223130	forward	predicted protein
b1175	minD	1223772	1224584	reverse	membrane ATPase of the MinC-MinD-MinE system that regulates septum placement
b1176	minC	1224608	1225303	reverse	cell division inhibitor of the MinC-MinD-MinE and DicB-MinC systems that regulate septum placement
b1178	pliG	1226294	1226695	reverse	inhibitor of g-type lysozyme
b1179	ycgL	1226904	1227230	forward	conserved protein
b1180	ycgM	1227302	1227961	forward	predicted isomerase/hydrolase
b1181	ycgN	1228053	1228499	forward	conserved protein
b1185	dsbB	1231723	1232253	reverse	DsbB<sub>reduced</sub>
b1186	nhaB	1232399	1233940	reverse	NhaB sodium/proton transporter
b1187	fadR	1234161	1234880	forward	FadR DNA-binding transcriptional dual regulator
b1188	ycgB	1234932	1236464	reverse	conserved protein
b1189	dadA	1236794	1238092	forward	D-amino acid dehydrogenase
b1190	dadX	1238102	1239172	forward
b1191	cvrA	1239558	1241294	reverse	YcgO CPA1 Transporter
b1192	ldcA	1241389	1242303	reverse	L,D-carboxypeptidase A
b1193	emtA	1242403	1243014	forward	lytic murein transglycosylase E
b1194	ycgR	1243016	1243750	reverse	molecular brake that regulates flagellar motility in response to c-di-GMP
b1195	ymgE	1243951	1244205	forward	predicted inner membrane protein
b1196	ycgY	1244383	1244823	forward	predicted protein
b1198	dhaM	1246919	1248337	reverse	dihydroxyacetone kinase subunit M
b1199	dhaL	1248348	1248980	reverse	dihydroxyacetone kinase subunit L
b1200	dhaK	1248991	1250061	reverse	dihydroxyacetone kinase subunit K
b1201	dhaR	1250289	1252208	forward	DhaR DNA-binding transcriptional dual regulator
b1203	ychF	1255944	1257035	reverse	ribosome-binding ATPase
b1204	pth	1257152	1257736	reverse	peptidyl-tRNA hydrolase
b1205	ychH	1258014	1258292	forward	stress-induced protein
b1206	ychM	1258347	1260026	reverse	YchM bicarbonate/carbonate transporter
b1207	prs	1260151	1261098	reverse	ribose-phosphate diphosphokinase
b1208	ispE	1261249	1262100	reverse
b1209	lolB	1262100	1262723	reverse	outer membrane lipoprotein, localization of lipoproteins in the outer membrane
b1210	hemA	1262937	1264193	forward
b1211	prfA	1264235	1265317	forward	peptide chain release factor RF1
b1212	prmC	1265317	1266150	forward	protein-(glutamine-N5) methyltransferase
b1213	ychQ	1266147	1266539	forward	predicted transcriptional regulator
b1214	ychA	1266543	1267352	forward	predicted transcriptional regulator
b1215	kdsA	1267388	1268242	forward	3-deoxy-D-<i>manno</i>-octulosonate 8-phosphate synthase
b4421	ldrB	1268926	1269033	reverse	small toxic polypeptide LdrB
b1219	ychN	1272469	1272822	reverse	conserved protein
b1220	ychO	1273148	1274401	forward	predicted invasin
b1228	ychS	1285932	1286207	forward	predicted protein
b1232	purU	1287005	1287847	reverse	formyltetrahydrofolate deformylase
b1233	ychJ	1287897	1288355	reverse	conserved protein
b1234	rssA	1288429	1289373	forward	conserved protein
b1237	hns	1291732	1292145	reverse	H-NS DNA-binding transcriptional dual regulator
b1241	adhE	1294669	1297344	reverse	AdhE
b1242	ychE	1297821	1298468	forward	predicted inner membrane protein
b1243	oppA	1299206	1300837	forward	OppA-oligopeptide ABC transporter substrate-binding
b1244	oppB	1300923	1301843	forward	OppB
b1245	oppC	1301858	1302766	forward	OppC
b1246	oppD	1302778	1303791	forward	OppD
b1247	oppF	1303788	1304792	forward	OppF
b1248	yciU	1304845	1305174	reverse	predicted protein
b1249	cls	1305209	1306669	reverse	cardiolipin synthase
b4595	yciY	1306812	1306985	forward	conserved protein
b1251	yciI	1308593	1308889	reverse	predicted enzyme
b1252	tonB	1309113	1309832	forward	TonB protein; energy transducer; uptake of iron, cyanocobalimin; sensitivity to phages, colicins
b1253	yciA	1309872	1310270	reverse	acyl-CoA thioesterase
b1254	yciB	1310375	1310914	reverse	predicted inner membrane protein
b1255	yciC	1310944	1311687	reverse	predicted inner membrane protein
b1256	ompW	1312044	1312682	forward	OmpW, outer membrane protein
b1260	trpA	1314440	1315246	reverse	tryptophan synthase, &alpha; subunit
b1261	trpB	1315246	1316439	reverse	tryptophan synthase, &beta; subunit
b1262	trpC	1316451	1317809	reverse	indole-3-glycerol phosphate synthase/phosphoribosylanthranilate isomerase
b1263	trpD	1317813	1319408	reverse	anthranilate synthase component II
b1264	trpE	1319408	1320970	reverse	anthranilate synthase component I
b1265	trpL	1321062	1321106	reverse	trp operon leader peptide
b1266	yciV	1321244	1322125	forward	conserved protein
b1267	yciO	1322122	1322742	forward	conserved protein
b1268	yciQ	1322770	1324665	forward	predicted inner membrane protein
b1269	rluB	1324876	1325751	forward	23S rRNA pseudouridine 2605 synthase
b1270	btuR	1325791	1326381	reverse	cobinamide adenosyltransferase/cobalamin adenosyltransferase
b1271	yciK	1326378	1327136	reverse	predicted oxidoreductase
b1272	sohB	1327356	1328405	forward	predicted inner membrane peptidase
b1273	yciN	1328441	1328692	reverse	predicted protein
b1274	topA	1329072	1331669	forward	DNA topoisomerase I
b1275	cysB	1331879	1332853	forward	CysB
b1276	acnA	1333855	1336530	forward	aconitate hydratase 1
b1277	ribA	1336594	1337184	reverse	GTP cyclohydrolase II
b1278	pgpB	1337354	1338118	forward	undecaprenyl pyrophosphate phosphatase/diacylglycerol pyrophosphate phosphatase/phosphatidylglycerophosphatase
b1279	yciS	1338267	1338575	forward	conserved inner membrane protein
b1280	yciM	1338582	1339751	forward	conserved protein
b1281	pyrF	1339945	1340682	forward	PyrF
b1282	yciH	1340682	1341008	forward	translation initiation factor
b1284	yciT	1341621	1342370	reverse	DNA-binding transcriptional regulator
b4596	yciZ	1342460	1342633	reverse	hypothetical protein
b1285	gmr	1342781	1344766	reverse	modulator of RNase II stability
b1286	rnb	1345002	1346936	reverse	ribonuclease II
b1287	yciW	1347004	1348131	reverse	predicted oxidoreductase
b1288	fabI	1348275	1349063	reverse	enoyl-[acyl-carrier-protein] reductase
b1289	ycjD	1349431	1349784	reverse	conserved protein
b1290	sapF	1349852	1350658	reverse	SapF
b1291	sapD	1350660	1351652	reverse	SapD
b1292	sapC	1351652	1352542	reverse	SapC
b1293	sapB	1352529	1353494	reverse	SapB
b1294	sapA	1353491	1355134	reverse	SapA
b1295	ymjA	1355447	1355692	reverse	predicted protein
b1296	puuP	1355826	1357211	reverse	putrescine importer
b1297	puuA	1357514	1358932	reverse	glutamate-putrescine ligase
b1298	puuD	1359144	1359908	forward	&gamma;-glutamyl-&gamma;-aminobutyrate hydrolase
b1299	puuR	1359935	1360492	forward	DNA-binding transcriptional repressor
b1300	puuC	1360767	1362254	forward	&gamma;-glutamyl-&gamma;-aminobutyraldehyde dehydrogenase
b1301	puuB	1362256	1363536	forward	&gamma;-glutamylputrescine oxidase
b1302	puuE	1363574	1364839	forward	4-aminobutyrate aminotransferase
b1303	pspF	1364959	1365936	reverse	PspF transcriptional dual regulator
b1304	pspA	1366103	1366771	forward	regulatory protein for the phage shock protein operon
b1305	pspB	1366825	1367049	forward	stimulates PspC-mediated transcriptional activation of the psp operon; antitoxin of a PspC-PspB toxin-antitoxin pair
b1306	pspC	1367049	1367408	forward	PspC transcriptional regulator; toxin of a PspC-PspB toxin-antitoxin pair
b1307	pspD	1367417	1367638	forward	peripheral inner membrane phage-shock protein
b1308	pspE	1367713	1368027	forward	thiosulfate sulfurtransferase
b1311	ycjO	1371246	1372127	forward	YcjO
b1312	ycjP	1372114	1372956	forward	YcjP
b1313	ycjQ	1372987	1374039	forward	predicted oxidoreductase, Zn-dependent and NAD(P)-binding
b1314	ycjR	1374058	1374846	forward	predicted enzyme
b1315	ycjS	1374856	1375911	forward	predicted oxidoreductase, NADH-binding
b1316	ycjT	1375908	1378175	forward	predicted hydrolase
b1317	ycjU	1378172	1378831	forward	&beta;-phosphoglucomutase
b1318	ycjV	1378845	1379813	forward	predicted sugar transporter subunit: ATP-binding component of ABC superfamily
b4524	ymjB	1379813	1379926	forward	predicted protein
b1320	ycjW	1380987	1381985	reverse	predicted DNA-binding transcriptional regulator, LacI type
b1321	ycjX	1382141	1383538	forward	conserved protein
b1322	ycjF	1383535	1384596	forward	conserved inner membrane protein
b1323	tyrR	1384744	1386285	forward	TyrR DNA-binding transcriptional dual regulator
b1324	tpx	1386329	1386835	reverse	lipid hydroperoxide peroxidase
b1325	ycjG	1386954	1387919	forward	L-Ala-D/L-Glu epimerase
b1326	mpaA	1387894	1388682	reverse	murein peptide amidase A
b4525	ymjC	1388704	1388886	reverse	predicted oxidoreductase
b4673	ymjD	1388892	1388957	reverse	small protein
b1327	ycjY	1388957	1389889	reverse	predicted hydrolase
b1328	ycjZ	1390015	1390914	forward	putative transcriptional regulator LysR-type
b1332	ynaJ	1395389	1395646	forward	predicted inner membrane protein
b1333	uspE	1395696	1396646	reverse	universal stress protein with a role cellular motility
b1334	fnr	1396798	1397550	reverse	FNR
b1335	ogt	1397745	1398260	reverse	Ogt
b1336	abgT	1398271	1399797	reverse	AbgT Transporter
b1337	abgB	1399834	1401279	reverse	<i>p</i>-aminobenzoyl-glutamate hydrolase subunit B
b1338	abgA	1401279	1402589	reverse	<i>p</i>-aminobenzoyl-glutamate hydrolase subunit A
b1339	abgR	1402765	1403673	forward	predicted DNA-binding transcriptional regulator, LYSR-type
b1340	ydaL	1404003	1404566	forward	conserved protein
b1342	ydaN	1406074	1407057	forward	predicted Zn(II) transporter
b1344	ttcA	1409037	1409972	reverse	predicted C32 tRNA thiolase
b4527	ydaF	1417180	1417335	reverse	Rac prophage; predicted protein
b1355	ydaG	1417346	1417480	reverse	Rac prophage; small protein
b1356	racR	1417789	1418265	reverse	hypothetical protein; predicted DNA-binding transcriptional regulator
b1357	ydaS	1418389	1418685	forward	Rac prophage; predicted DNA-binding transcriptional regulator
b1358	ydaT	1418708	1419130	forward	Rac prophage; predicted protein
b1359	ydaU	1419143	1420000	forward	Rac prophage; conserved protein
b1360	ydaV	1420007	1420753	forward	Rac prophage; predicted DNA replication protein
b1361	ydaW	1420776	1421336	forward	Rac prophage; predicted DNA-binding protein
b4528	rzoR	1421424	1421609	forward	Rac prophage; predicted lipoprotein
b1369	lomR_1	1425482	1425637	forward	Rac prophage; predicted protein, N-ter fragment
b1370	insH-5	1425770	1426750	reverse	IS5 transposase and trans-activator
b1371	lomR_2	1426838	1427008	forward	Rac prophage; predicted protein, C-ter fragment
b1372	stfR	1427073	1430435	forward	putative membrane protein
b1373	tfaR	1430435	1431010	forward	Rac prophage; predicted tail fiber assembly protein
b1375	ynaE	1432015	1432248	reverse	Rac prophage; cold shock protein, function unknown
b1376	uspF	1433209	1433643	reverse	nucleotide binding filament protein
b1378	ydbK	1435284	1438808	reverse	predicted pyruvate:flavodoxin oxidoreductase
b4529	ydbJ	1439082	1439348	forward	predicted protein
b1379	hslJ	1439345	1439767	reverse	heat shock protein HslJ
b1381	ydbH	1441075	1443714	forward	predicted protein
b1382	ynbE	1443711	1443896	forward	hypothetical protein
b1383	ydbL	1443904	1444230	forward	conserved protein
b1384	feaR	1444402	1445307	reverse	FeaR DNA-binding transcriptional activator
b1385	feaB	1445543	1447042	forward	FeaB
b1386	tynA	1447100	1449373	reverse	TynA
b1387	paaZ	1449621	1451666	reverse	oxepin-CoA hydrolase/3-oxo-5,6-dehydrosuberyl-CoA semialdehyde dehydrogenase
b1388	paaA	1451951	1452880	forward	ring 1,2-phenylacetyl-CoA epoxidase, monooxygenase subunit
b1389	paaB	1452892	1453179	forward	ring 1,2-phenylacetyl-CoA epoxidase subunit
b1390	paaC	1453188	1453934	forward	ring 1,2-phenylacetyl-CoA epoxidase, structural subunit
b1391	paaD	1453949	1454446	forward	phenylacetate degradation protein
b1392	paaE	1454454	1455524	forward	ring 1,2-phenylacetyl-CoA epoxidase, reductase subunit
b1393	paaF	1455521	1456288	forward	predicted 2,3-dehydroadipyl-CoA hydratase
b1394	paaG	1456288	1457076	forward	predicted ring 1,2-epoxyphenylacetyl-CoA isomerase (oxepin-CoA forming)
b1395	paaH	1457078	1458505	forward	3-hydroxyadipyl-CoA dehydrogenase (NAD<sup>+</sup>)
b1396	paaI	1458495	1458917	forward	hydroxyphenylacetyl-CoA thioesterase
b1397	paaJ	1458917	1460122	forward	&beta;-ketoadipyl-CoA thiolase
b1398	paaK	1460149	1461462	forward	phenylacetate-CoA ligase
b1399	paaX	1461563	1462513	forward	PaaX
b1400	paaY	1462495	1463085	forward	predicted hexapeptide repeat acetyltransferase
b4674	ynbG	1463189	1463254	reverse	small protein
b1404	insI-2	1467382	1468533	forward	transposase of IS30
b1406	ydbC	1472245	1473105	forward	predicted oxidoreductase, NAD(P)-binding
b1411	ynbD	1478933	1480225	forward	predicted phosphatase, inner membrane protein
b1412	azoR	1480279	1480884	reverse	NADH-azoreductase, FMN-dependent
b1413	hrpA	1481142	1484987	forward	ATP-dependent helicase
b1414	ydcF	1485259	1486059	forward	conserved protein
b1415	aldA	1486256	1487695	forward	AldA
b1418	cybB	1488926	1489456	forward	cytochrome b561
b1419	ydcA	1489701	1489874	forward	hypothetical protein
b4428	hokB	1489946	1490095	reverse	small toxic membrane polypeptide
b1420	mokB	1489986	1490153	reverse	regulatory peptide whose translation enables hokB expression
b1421	trg	1490494	1492134	forward	Trg
b1422	ydcI	1492172	1493095	reverse	putative transcriptional regulator LysR-type
b1424	mdoD	1494880	1496535	forward	glucan biosynthesis protein D
b1426	ydcH	1496675	1496899	forward	predicted protein
b1427	rimL	1496962	1497501	forward	ribosomal-protein-L12-serine acetyltransferase
b1428	ydcK	1497493	1498473	reverse	predicted enzyme
b1429	tehA	1498597	1499589	forward	TehA TDT transporter
b1430	tehB	1499586	1500179	forward	tellurite methyltransferase
b1432	ydcM	1501681	1502889	forward	predicted transposase
b1433	ydcO	1502929	1504104	reverse	predicted benzoate transporter
b1434	ydcN	1504196	1504732	forward	predicted DNA-binding transcriptional regulator
b1435	ydcP	1504805	1506766	forward	predicted peptidase
b1436	yncJ	1506858	1507088	reverse	predicted protein
b4532	hicA	1507310	1507486	forward	toxin of the HicA-HicB toxin-antitoxin system
b1438	hicB	1507511	1507948	forward	antitoxin of the HicA-HicB toxin-antitoxin system
b1439	ydcR	1508027	1509433	forward	fused predicted DNA-binding transcriptional regulator and predicted amino transferase
b4598	yncL	1515123	1515218	reverse	small membrane protein
b1445	ydcX	1515413	1515586	forward	predicted inner membrane protein
b1446	ydcY	1515672	1515905	forward	hypothetical protein
b1447	ydcZ	1515906	1516355	reverse	predicted inner membrane protein
b1448	yncA	1516352	1516870	reverse	predicted acyltransferase with acyl-CoA N-acyltransferase domain
b1451	yncD	1518987	1521089	reverse	probable TonB-dependent receptor
b1452	yncE	1521331	1522392	forward	conserved protein
b1453	ansP	1522505	1524004	reverse	AnsP L-asparagine APC Transporter
b1455	yncH	1524964	1525176	forward	hypothetical protein
b1463	nhoA	1532048	1532893	forward	NhoA
b1464	yddE	1532989	1533882	reverse	conserved protein
b1476	fdnI	1549362	1550015	forward	formate dehydrogenase N, &gamma; subunit
b1477	yddM	1550422	1550784	reverse	predicted DNA-binding transcriptional regulator
b1480	sra	1553850	1553987	reverse	30S ribosomal subunit protein S22
b1481	bdm	1554089	1554304	reverse	biofilm-dependent modulation protein
b1484	ddpD	1556055	1557041	reverse	YddP
b1485	ddpC	1557038	1557934	reverse	YddQ
b1486	ddpB	1557931	1558953	reverse	YddR
b1487	ddpA	1558955	1560505	reverse	YddS
b1488	ddpX	1560519	1561100	reverse	D-Ala-D-Ala dipeptidase
b1491	yddW	1565528	1566847	reverse	predicted lipoprotein
b1506	yneL	1588381	1588560	reverse	predicted transcriptional regulator
b1507	hipA	1588878	1590200	reverse	serine/threonine kinase HipA
b1508	hipB	1590200	1590466	reverse	HipB
b1511	lsrK	1596641	1598233	reverse	autoinducer-2 kinase
b1512	lsrR	1598312	1599265	reverse	LsrR DNA-binding transcriptional repressor
b1515	lsrD	1602071	1603063	forward	LsrD
b1520	yneE	1606132	1607046	reverse	conserved inner membrane protein
b1522	yneF	1608931	1609878	reverse	predicted diguanylate cyclase
b1523	yneG	1609990	1610349	reverse	conserved protein
b1524	yneH	1610349	1611275	reverse	glutaminase
b1525	sad	1611339	1612727	reverse
b1528	ydeA	1615052	1616242	forward	YdeA MFS transporter
b1529	marC	1616267	1616932	reverse	predicted transporter
b1530	marR	1617144	1617578	forward	MarR transcriptional repressor
b1531	marA	1617598	1617981	forward	MarA DNA-binding transcriptional dual regulator
b1532	marB	1618013	1618231	forward	multiple antibiotic resistance protein
b1533	eamA	1618262	1619161	reverse	O-acetylserine/cysteine export protein
b1534	ydeE	1619356	1620543	forward	YdeE MFS transporter
b1538	dcp	1623359	1625404	reverse	dipeptidyl carboxypeptidase II
b1539	ydfG	1625541	1626287	forward	3-hydroxy acid dehydrogenase monomer
b1540	ydfH	1626376	1627062	forward	predicted DNA-binding transcriptional regulator
b1541	ydfZ	1627239	1627442	forward	conserved protein
b1546	tfaQ	1632334	1632909	reverse	Qin prophage; predicted tail fibre assembly protein
b1547	ydfN	1632909	1633871	reverse	Qin prophage; predicted side tail fibre assembly protein
b1548	nohA	1633822	1634391	reverse	Qin prophage; predicted packaging protein
b4533	ynfO	1634780	1635013	forward	Qin prophage; predicted protein
b1554	ydfQ	1637548	1638081	reverse	Qin prophage; predicted lysozyme
b1555	ydfR	1638078	1638389	reverse	Qin prophage; predicted protein
b1556	essQ	1638394	1638609	reverse	Qin prophage; predicted S lysis protein
b1557	cspB	1639363	1639578	reverse	Qin prophage; cold shock protein; predicted DNA-binding transcriptional regulator
b1558	cspF	1639879	1640091	forward	Qin prophage; cold shock protein
b1559	ydfT	1640513	1641265	reverse	Qin prophage; predicted antitermination protein Q
b1560	ydfU	1641279	1642328	reverse	Qin prophage; predicted protein
b1561	rem	1642675	1642926	reverse	Qin prophage; predicted protein
b1562	hokD	1643143	1643298	reverse	Qin prophage; small toxic polypeptide
b1563	relE	1643370	1643657	reverse	Qin prophage; toxin of the RelE-RelB toxin-antitoxin system and cofactor to enhance the repressor activity of RelB
b1564	relB	1643657	1643896	reverse	RelB Qin prophage; antitoxin of the RelE-RelB toxin-antitoxin system and DNA binding transcriptional repressor
b1565	ydfV	1643921	1644226	forward	Qin prophage; predicted protein
b1566	flxA	1644429	1644761	forward	Qin prophage; predicted protein
b1567	ydfW	1645198	1645347	reverse	Qin prophage; predicted protein
b1568	ydfX	1645370	1645660	reverse	Qin prophage; predicted protein
b1569	dicC	1645644	1645874	reverse	Qin prophage; DNA-binding transcriptional regulator for DicB
b1570	dicA	1645958	1646365	forward	DicA DNA-binding transcriptional repressor
b1571	ydfA	1646532	1646687	forward	Qin prophage; predicted protein
b1572	ydfB	1646689	1646817	forward	Qin prophage; small protein
b1573	rzpQ	1646847	1647065	forward	Qin prophage; predicted protein
b1575	dicB	1647633	1647821	forward	Qin prophage; cell division inhibition protein
b1576	ydfD	1647818	1648009	forward	Qin prophage; predicted protein
b1577	ydfE	1648102	1649022	forward	Qin prophage; predicted protein
b1578	insD	1648905	1649561	forward	Qin prophage; predicted transposase
b1579	intQ	1649536	1650732	forward	Qin prophage; predicted defective integrase
b1581	rspA	1651951	1653165	reverse	mannonate/altronate dehydratase
b1582	ynfA	1653371	1653697	reverse	conserved inner membrane protein
b1583	ynfB	1653832	1654173	forward	predicted protein
b1584	speG	1654208	1654768	forward	SpeG
b1585	ynfC	1654771	1655481	reverse	YnfC lipoprotein
b1586	ynfD	1655589	1655894	forward	predicted protein
b1587	ynfE	1656093	1658519	forward	oxidoreductase subunit
b1588	ynfF	1658580	1661003	forward	oxidoreductase subunit
b1589	ynfG	1661014	1661631	forward	oxidoreductase, predicted Fe-S subunit
b1590	ynfH	1661633	1662487	forward	oxidoreductase, predicted membrane anchor subunit
b1591	dmsD	1662530	1663144	forward	DMS reductase maturation protein
b1592	clcB	1663339	1664595	forward	YnfJ chloride ion ClC transporter
b1593	ynfK	1664548	1665243	reverse	predicted dethiobiotin synthetase
b1594	dgsA	1665368	1666588	reverse	DgsA DNA-binding transcriptional repressor
b1595	ynfL	1666723	1667616	reverse	predicted DNA-binding transcriptional regulator
b1596	ynfM	1667723	1668976	forward	YnfM MFS transporter
b4601	ydgU	1669801	1669884	forward	small predicted membrane protein
b1598	ydgD	1669984	1670805	forward	predicted peptidase
b1602	pntB	1672996	1674384	reverse	pyridine nucleotide transhydrogenase, &beta; subunit
b1603	pntA	1674395	1675927	reverse	pyridine nucleotide transhydrogenase, &alpha; subunit
b1604	ydgH	1676451	1677395	forward	predicted protein
b1605	ydgI	1677581	1678963	forward	ArcD APC transporter
b1606	folM	1679000	1679722	forward	dihydromonapterin reductase/dihydrofolate reductase
b1607	ydgC	1679719	1680054	reverse	hypothetical protein
b1608	rstA	1680174	1680902	forward	RstA transcriptional regulator
b1609	rstB	1680906	1682207	forward	RstB sensory histidine kinase
b1610	tus	1682283	1683212	forward	DNA-binding protein; inhibition of replication at Ter sites
b1611	fumC	1683209	1684612	reverse	fumarase C monomer
b1612	fumA	1684755	1686401	reverse	fumarase A monomer
b1613	manA	1686600	1687775	forward	mannose-6-phosphate isomerase
b1616	uidB	1690914	1692287	reverse	UidB glucuronides GPH transporter
b1617	uidA	1692284	1694095	reverse	&beta;-D-glucuronidase
b1618	uidR	1694486	1695076	reverse	UidR DNA-binding transcriptional repressor
b1620	malI	1696176	1697204	reverse	MalI DNA-binding transcriptional repressor
b1621	malX	1697379	1698971	forward	MalX
b1622	malY	1698981	1700153	forward	bifunctional &beta;-cystathionase, PLP-dependent and regulator of maltose regulon
b1623	add	1700257	1701258	forward	deoxyadenosine deaminase/adenosine deaminase
b1624	ydgJ	1701292	1702332	reverse	putative galactose 1-dehydrogenase
b1627	rsxA	1703791	1704372	forward	integral membrane protein of SoxR-reducing complex
b1630	rsxD	1707166	1708224	forward	integral membrane protein of SoxR-reducing complex
b1631	rsxG	1708228	1708848	forward	member of SoxR-reducing complex
b1632	rsxE	1708852	1709547	forward	integral membrane protein of SoxR-reducing complex
b1633	nth	1709547	1710182	forward	endonuclease III; specific for apurinic and/or apyrimidinic sites
b1634	tppB	1710793	1712295	forward	TppB peptide POT Transporter
b1635	gst	1712401	1713006	forward	Gst
b1636	pdxY	1713050	1713913	reverse	pyridoxal kinase 2
b1637	tyrS	1713972	1715246	reverse	tyrosyl-tRNA synthetase
b1638	pdxH	1715375	1716031	reverse	PdxH
b1639	mliC	1716090	1716419	reverse	inhibitor of c-type lysozyme, predicted lipoprotein
b1640	anmK	1716517	1717626	reverse	anhydro-<i>N</i>-acetylmuramic acid kinase
b1641	slyB	1717900	1718367	forward	outer membrane lipoprotein
b1642	slyA	1718414	1718848	reverse	SlyA DNA-binding transcriptional activator
b1643	ydhI	1719049	1719285	forward	predicted inner membrane protein
b1644	ydhJ	1719288	1720145	forward	conserved protein
b1645	ydhK	1720145	1722157	forward	conserved inner membrane protein
b1646	sodC	1722158	1722679	reverse	superoxide dismutase precursor (Cu-Zn)
b1647	ydhF	1722760	1723656	reverse	predicted oxidoreductase
b1648	ydhL	1723705	1723944	reverse	conserved protein
b1649	nemR	1724047	1724646	forward	NemR DNA-binding transcriptional repressor
b1650	nemA	1724683	1725780	forward	N-ethylmaleimide reductase, FMN-linked
b1652	rnt	1726371	1727018	forward	Rnt
b1653	lhr	1727111	1731727	forward	member of ATP-dependent helicase superfamily II
b1654	grxD	1731778	1732125	reverse	glutaredoxin 4
b1655	ydhO	1732459	1733274	forward	predicted lipoprotein
b1656	sodB	1733402	1733983	forward	SodB
b1657	ydhP	1734145	1735314	reverse	YdhP
b4602	ynhF	1735480	1735569	reverse	small stress response membrane protein
b1658	purR	1735868	1736893	forward	PurR
b1659	ydhB	1736890	1737822	reverse	protein with similarity to transcriptional regulators
b1660	ydhC	1737935	1739146	forward	YdhC drug MFS transporter
b1662	ribC	1740625	1741266	reverse
b1663	mdtK	1741481	1742854	forward	YdhE multidrug efflux MATE transporter
b1664	ydhQ	1742895	1744151	reverse	conserved protein
b1667	ydhR	1744724	1745029	forward	predicted mono-oxygenase
b1677	lpp	1755445	1755681	forward	murein lipoprotein
b1678	ynhG	1755745	1756749	reverse	L,D-transpeptidase YnhG
b1685	ydiH	1762958	1763227	reverse	predicted protein
b1686	ydiI	1763246	1763656	reverse	esterase
b1687	ydiJ	1763653	1766709	reverse	predicted FAD-linked oxidoreductase
b1688	ydiK	1767098	1768210	forward	predicted inner membrane protein
b1696	ydiP	1776414	1777325	reverse	predicted DNA-binding transcriptional regulator
b1697	ydiQ	1777641	1778405	forward	putative subunit of YdiQ-YdiR flavoprotein
b1698	ydiR	1778425	1779363	forward	putative subunit of YdiQ-YdiR flavoprotein
b1699	ydiS	1779419	1780708	forward	putative flavoprotein
b1700	ydiT	1780705	1780998	forward	putative ferredoxin
b1701	fadK	1781001	1782701	forward	short chain acyl-CoA synthetase monomer
b1702	ppsA	1782758	1785136	reverse	phosphoenolpyruvate synthetase
b1704	aroH	1786459	1787505	forward	AroH
b1705	ydiE	1787637	1787828	forward	conserved protein
b1706	ydiU	1787832	1789268	reverse	conserved protein
b1708	nlpC	1790291	1790755	reverse	NlpC-putative lipoprotein hydrolase
b1709	btuD	1790833	1791582	reverse	BtuD
b1710	btuE	1791582	1792133	reverse	thioredoxin/glutathione peroxidase
b1711	btuC	1792196	1793176	reverse	BtuC
b1712	ihfA	1793277	1793576	reverse	integration host factor (IHF), &alpha; subunit
b1713	pheT	1793581	1795968	reverse	phenylalanyl-tRNA synthetase &beta;-chain
b1714	pheS	1795983	1796966	reverse	phenylalanyl-tRNA synthetase &alpha;-chain
b1715	pheM	1797250	1797294	reverse	phenylalanyl-tRNA synthetase (pheST) operon leader peptide
b1716	rplT	1797417	1797773	reverse	50S ribosomal subunit protein L20
b1717	rpmI	1797826	1798023	reverse	50S ribosomal subunit protein L35
b1718	infC	1798120	1798662	reverse	protein chain initiation factor IF-3
b1719	thrS	1798666	1800594	reverse	threonyl-tRNA synthetase
b4535	yniD	1803189	1803296	forward	small predicted membrane protein
b1722	ydiY	1803349	1804107	reverse	conserved protein
b1723	pfkB	1804394	1805323	forward	6-phosphofructokinase-2 monomer
b1724	ydiZ	1805424	1805714	forward	predicted protein
b1725	yniA	1805820	1806680	forward	predicted phosphotransferase/kinase
b1726	yniB	1806721	1807257	reverse	predicted inner membrane protein
b1727	yniC	1807404	1808072	forward	2-deoxyglucose-6-phosphatase
b1728	ydjM	1808235	1808825	forward	predicted inner membrane protein regulated by LexA
b1731	cedA	1811445	1811687	reverse	cell division modulator
b1733	chbG	1814410	1815159	reverse	conserved protein
b1738	chbB	1819323	1819643	reverse	ChbB
b1740	nadE	1820482	1821309	forward	NadE
b1741	cho	1821539	1822426	forward	endonuclease of nucleotide excision repair
b1742	ves	1822386	1822961	reverse	conserved protein
b1744	astE	1823979	1824947	reverse	succinylglutamate desuccinylase
b1745	astB	1824940	1826283	reverse	succinylarginine dihydrolase
b1746	astD	1826280	1827758	reverse	aldehyde dehydrogenase
b1747	astA	1827755	1828789	reverse	arginine succinyltransferase
b1748	astC	1828786	1830006	reverse	AstC
b1749	xthA	1830452	1831258	forward	exonuclease III
b1750	ydjX	1831425	1832135	forward	predicted inner membrane protein
b1751	ydjY	1832140	1832817	forward	predicted protein
b1752	ydjZ	1832832	1833539	forward	conserved inner membrane protein
b1753	ynjA	1833539	1834087	forward	conserved protein
b1754	ynjB	1834097	1835263	forward	conserved protein
b1755	ynjC	1835281	1836771	forward	YnjC
b1756	ynjD	1836771	1837424	forward	YnjD
b1757	ynjE	1837491	1838798	forward	YnjE sulfurtransferase
b1758	ynjF	1838807	1839427	reverse	predicted phosphatidyl transferase, inner membrane protein
b1759	nudG	1839514	1839921	forward	pyrimidine (deoxy)nucleoside triphosphate pyrophosphohydrolase
b1760	ynjH	1839887	1840159	reverse	predicted protein
b1761	gdhA	1840395	1841738	forward	GdhA
b1763	topB	1843023	1844984	reverse	DNA topoisomerase III
b1764	selD	1844989	1846032	reverse	selenide, water dikinase
b1765	ydjA	1846149	1846700	reverse	predicted oxidoreductase
b1766	sppA	1846861	1848717	forward	protease IV
b1767	ansA	1848884	1849900	forward	AnsA
b1768	pncA	1849911	1850552	forward	pyrazinamidase/nicotinamidase
b1770	ydjF	1852120	1852878	reverse	predicted DNA-binding transcriptional regulator
b1775	ydjK	1856874	1858253	reverse	predicted transporter
b1776	ydjL	1858280	1859356	reverse	predicted oxidoreductase, Zn-dependent and NAD(P)-binding
b1777	yeaC	1859726	1859998	reverse	conserved protein
b1778	msrB	1860040	1860453	reverse	methionine sulfoxide reductase B
b1780	yeaD	1861874	1862758	forward	conserved protein
b1781	yeaE	1862806	1863660	reverse	methylglyoxal reductase
b1782	mipA	1863750	1864496	reverse	scaffolding protein that interacts with murein polymerase and murein hydrolase
b1783	yeaG	1864932	1866866	forward	protein kinase
b1784	yeaH	1866979	1868262	forward	conserved protein
b1788	yoaI	1872102	1872206	reverse	predicted protein
b1789	yeaL	1872376	1872822	forward	conserved inner membrane protein
b1790	yeaM	1872779	1873600	reverse	predicted DNA-binding transcriptional regulator
b1791	yeaN	1873697	1874878	forward	putative amino acid/amine MFS transporter
b1792	yeaO	1874933	1875280	forward	conserved protein
b1793	yoaF	1875302	1875556	reverse	conserved outer membrane protein
b1794	yeaP	1875739	1876764	forward	diguanylate cyclase
b4676	yoaK	1876797	1876895	forward	small membrane protein
b4675	yoaJ	1876898	1876972	forward	small membrane protein
b1796	yoaG	1877427	1877609	reverse	predicted protein
b1797	yeaR	1877613	1877972	reverse	conserved protein
b1799	dmlR	1878910	1879833	reverse	DmlR DNA-binding transcriptional regulator
b1800	dmlA	1879936	1881021	forward	D-malate dehydrogenase (decarboxylating)
b1801	yeaV	1881212	1882657	forward	predicted transporter
b1802	yeaW	1882689	1883813	forward	2Fe-2S cluster-containing protein
b1803	yeaX	1883869	1884834	forward	predicted oxidoreductase
b1804	rnd	1884888	1886015	reverse	RNase D
b1805	fadD	1886085	1887770	reverse	FadD
b1806	yeaY	1887975	1888556	reverse	predicted lipoprotein
b1807	yeaZ	1888596	1889291	reverse	protease specific for YgjD
b1808	yoaA	1889349	1891259	reverse	conserved protein
b1809	yoaB	1891391	1891735	forward	conserved protein
b1811	yoaH	1892576	1892755	reverse	conserved protein
b1812	pabB	1892829	1894190	forward	PabB
b1813	nudL	1894194	1894772	forward	predicted NUDIX hydrolase with low 3-phosphohydroxypyruvate phosphatase activity
b1814	sdaA	1894956	1896320	forward	L-serine deaminase I
b1815	yoaD	1896451	1898049	forward	predicted phosphodiesterase
b1816	yoaE	1898053	1899609	reverse	predicted inner membrane protein
b1819	manZ	1901910	1902770	forward	ManZ
b1820	yobD	1902825	1903283	forward	conserved inner membrane protein
b1821	yebN	1903712	1904278	forward	conserved inner membrane protein
b1822	rrmA	1904275	1905084	reverse	23S rRNA m<sup>1</sup>G745 methyltransferase
b1825	yebO	1906285	1906572	reverse	predicted protein
b1826	mgrB	1906647	1906790	reverse	autoregulator of the PhoQP system
b4536	yobH	1906949	1907188	forward	predicted protein
b1827	kdgR	1907332	1908123	reverse	KdgR DNA-binding transcriptional repressor
b1828	yebQ	1908300	1909673	forward	predicted transporter
b1829	htpX	1909719	1910600	reverse	heat shock protein, integral membrane protein
b1830	prc	1910792	1912840	reverse	tail-specific protease
b1831	proQ	1912860	1913558	reverse	RNA chaperone, involved in posttranscriptional control of ProP levels
b1832	yebR	1913655	1914206	reverse	free methionine-(<i>R</i>)-sulfoxide reductase
b1833	yebS	1914282	1915565	forward	conserved inner membrane protein
b1834	yebT	1915534	1918167	forward	conserved protein
b1835	rsmF	1918247	1919686	forward	16S rRNA m<sup>5</sup>C1407 methyltransferase
b1837	yebW	1920145	1920336	forward	predicted protein
b1838	pphA	1920337	1920993	reverse	protein phosphatase 1 modulates phosphoproteins, signals protein misfolding
b1839	yebY	1921389	1921730	reverse	predicted protein
b1840	yebZ	1921743	1922615	reverse	putative resistance protein
b1841	yobA	1922619	1922993	reverse	conserved protein
b1842	holE	1923132	1923362	forward	DNA polymerase III, &theta; subunit
b1843	yobB	1923464	1924120	forward	conserved protein
b1844	exoX	1924144	1924806	forward	exonuclease X
b1845	ptrB	1924803	1926863	reverse	protease II
b1846	yebE	1927072	1927731	reverse	conserved inner membrane protein
b1847	yebF	1928058	1928414	reverse	predicted protein
b1848	yebG	1928481	1928771	reverse	conserved protein regulated by LexA
b1849	purT	1928905	1930083	forward	phosphoribosylglycinamide formyltransferase 2
b1850	eda	1930139	1930780	reverse	Eda
b1851	edd	1930817	1932628	reverse	phosphogluconate dehydratase
b1852	zwf	1932863	1934338	reverse	glucose 6-phosphate-1-dehydrogenase
b1853	yebK	1934676	1935545	forward	predicted DNA-binding transcriptional regulator
b1854	pykA	1935673	1937115	forward	pyruvate kinase II monomer
b1855	lpxM	1937246	1938217	reverse	myristoyl-acyl carrier protein (ACP)-dependent acyltransferase
b1856	yebA	1938337	1939659	reverse	predicted peptidase
b1857	znuA	1939675	1940607	reverse	ZnuA
b1858	znuC	1940686	1941441	forward	ZnuC
b1859	znuB	1941438	1942223	forward	ZnuB
b1860	ruvB	1942370	1943380	reverse	branch migration of Holliday structures; repair helicase
b4677	yobI	1944139	1944204	reverse	small protein
b1863	ruvC	1944879	1945400	reverse	Holliday junction nuclease; resolution of structures; repair
b1864	yebC	1945435	1946175	reverse	conserved protein
b1865	nudB	1946204	1946656	reverse	dihydroneopterin triphosphate pyrophosphohydrolase
b1866	aspS	1946774	1948546	reverse	aspartyl-tRNA synthetase
b1867	yecD	1948856	1949422	forward	predicted hydrolase
b1868	yecE	1949419	1950237	forward	conserved protein
b1869	yecN	1950290	1950685	forward	predicted inner membrane protein
b1870	cmoA	1950726	1951469	forward	predicted methyltransferase
b1871	cmoB	1951466	1952437	forward	predicted S-adenosyl-L-methionine-dependent methyltransferase
b1874	cutC	1956544	1956984	reverse	copper homeostasis protein
b1875	yecM	1957304	1957870	reverse	predicted metal-binding enzyme
b1876	argS	1958086	1959819	forward	arginyl-tRNA synthetase
b1878	flhE	1960604	1960996	reverse	flagellar protein
b1879	flhA	1960996	1963074	reverse	flagellar biosynthesis protein FlhA
b1880	flhB	1963067	1964215	reverse	flagellar biosynthesis protein FlhB
b1881	cheZ	1964417	1965061	reverse	CheZ
b1882	cheY	1965072	1965461	reverse	chemotaxis regulator transmitting signal to flagellar motor component
b1883	cheB	1965476	1966525	reverse	CheB
b1884	cheR	1966528	1967388	reverse	chemotaxis protein methyltransferase/chemotaxis protein methyltransferase/chemotaxis protein methyltransferase/chemotaxis protein methyltransferase/chemotaxis protein methyltransferase
b1885	tap	1967407	1969008	reverse	Tap
b1886	tar	1969054	1970715	reverse	Tar
b1887	cheW	1970860	1971363	reverse	CheW
b1888	cheA	1971384	1973348	reverse	CheA(S)
b1889	motB	1973353	1974279	reverse	MotB protein, enables flagellar motor rotation, linking torque machinery to cell wall
b1890	motA	1974276	1975163	reverse	MotA protein, proton conductor component of motor; no effect on switching
b1891	flhC	1975290	1975868	reverse	FlhC
b1892	flhD	1975871	1976221	reverse	FlhD
b1895	uspC	1977777	1978205	forward	universal stress protein
b4460	araH	1980578	1981567	reverse	high-affinity L-arabinose transport protein (ABC superfamily, membrane)
b1902	ftnB	1984949	1985452	forward	predicted ferritin-like protein
b1904	yecR	1986246	1986569	forward	predicted protein
b1905	ftnA	1986740	1987237	forward	ferritin iron storage protein
b1907	tyrP	1987705	1988916	forward	tyrosine ArAAP transporter
b1908	yecA	1988978	1989643	reverse	conserved metal-binding protein
b1912	pgsA	1990293	1990841	reverse	phosphatidylglycerophosphate synthase
b1913	uvrC	1990898	1992730	reverse	excinuclease ABC, subunit C; repair of UV damage to DNA
b1914	uvrY	1992727	1993383	reverse	UvrY transcriptional regulator
b1915	yecF	1993842	1994066	forward	predicted protein
b1916	sdiA	1994134	1994856	reverse	SdiA DNA-binding transcriptional dual regulator
b1917	yecC	1995086	1995838	reverse	predicted transporter subunit: ATP-binding component of ABC superfamily
b1918	yecS	1995835	1996503	reverse	predicted transporter subunit: membrane component of ABC superfamily
b1919	dcyD	1996518	1997504	reverse	D-cysteine desulfhydrase monomer
b1920	fliY	1997609	1998409	reverse	periplasmic cystine-binding protein; member of extracellular bacterial solute-binding protein family III
b1921	fliZ	1998497	1999048	reverse	regulator of &sigma;<sup>S</sup> activity
b1922	fliA	1999094	1999813	reverse	RNA polymerase, sigma 28 (sigma F) factor
b1923	fliC	2000134	2001630	reverse	flagellar biosynthesis; flagellin, filament structural protein
b1924	fliD	2001896	2003302	forward	flagellar cap protein FliD; filament capping protein; enables filament assembly
b1925	fliS	2003327	2003737	forward	flagellar biosynthesis protein FliS
b1926	fliT	2003737	2004102	forward	flagellar biosynthesis protein FliT
b1928	yedD	2005701	2006114	reverse	predicted protein
b1929	yedE	2006301	2007506	forward	predicted inner membrane protein
b1930	yedF	2007503	2007736	forward	conserved protein
b1931	yedK	2007845	2008513	forward	predicted protein
b1939	fliG	2012904	2013899	forward	flagellar motor switch protein FliG
b1940	fliH	2013892	2014578	forward	flagellar biosynthesis protein FliH
b1941	fliI	2014578	2015951	forward	flagellum-specific ATP synthase FliI
b1942	fliJ	2015970	2016413	forward	flagellar biosynthesis protein FliJ
b1943	fliK	2016410	2017537	forward	flagellar hook-length control protein FliK
b1944	fliL	2017642	2018106	forward	flagellar biosynthesis
b1945	fliM	2018111	2019115	forward	flagellar motor switch protein FliM
b1946	fliN	2019112	2019525	forward	flagellar motor switch protein FliN
b1947	fliO	2019528	2019893	forward	flagellar biosynthesis protein FliO
b1948	fliP	2019893	2020630	forward	flagellar biosynthesis protein FliP
b1949	fliQ	2020640	2020909	forward	flagellar biosynthesis protein FliQ
b1952	dsrB	2022659	2022847	reverse	hypothetical protein; transcription is regulated by RpoS and DsrA RNA
b1953	yodD	2023010	2023237	forward	stress-induced protein
b1955	yedP	2023535	2024350	forward	predicted phosphatase
b1956	yedQ	2024347	2026041	reverse	predicted diguanylate cyclase
b1957	yodC	2026212	2026394	reverse	predicted protein
b1958	yedI	2026473	2027390	reverse	conserved inner membrane protein
b1959	yedA	2027563	2028483	forward	putative membrane transport protein
b1960	vsr	2028472	2028942	reverse	DNA mismatch endonuclease of the very short patch (VSP) mismatch repair pathway
b1961	dcm	2028923	2030341	reverse	DNA-cytosine methyltransferase
b1972	yedZ	2038507	2039142	forward	conserved inner membrane protein
b1973	zinT	2039399	2040049	forward	cadmium-induced cadmium binding protein
b1974	yodB	2040392	2040922	forward	predicted cytochrome
b1976	mtfA	2041675	2042472	forward	Mlc titration factor
b1978	yeeJ	2042935	2050038	forward	adhesin
b1981	shiA	2051667	2052983	forward	ShiA shikimate MFS transporter
b1982	amn	2053085	2054539	forward	Amn
b1985	yeeO	2056227	2057870	reverse	YeeO MATE transporter
b1987	cbl	2057988	2058938	reverse	Cbl DNA-binding transcriptional activator
b1988	nac	2059040	2059957	reverse	Nac DNA-binding transcriptional dual regulator
b1990	erfK	2060415	2061347	reverse	L,D-transpeptidase ErfK
b1991	cobT	2061412	2062491	reverse	CobT
b1992	cobS	2062503	2063246	reverse	cobalamin 5'-phosphate synthase/cobalamin synthase
b1993	cobU	2063243	2063788	reverse	CobU
b1994	insH-6	2064329	2065345	reverse	IS5 transposase and trans-activator
b1995	yoeA	2066659	2067051	forward	CP4-44 prophage; predicted disrupted hemin or colicin receptor
b1998	yoeE	2068268	2068528	forward	hypothetical protein
b1999	yeeP	2068810	2069235	forward	CP4-44 prophage; predicted GTP-binding protein
b2000	flu	2069563	2072682	forward	CP4-44 prophage; antigen 43 (Ag43) phase-variable biofilm formation autotransporter
b2001	yeeR	2072803	2074335	forward	CP4-44 prophage; predicted membrane protein
b2002	yeeS	2074332	2074778	forward	CP4-44 prophage; predicted DNA repair protein
b2003	yeeT	2074841	2075062	forward	CP4-44 prophage; predicted protein
b2004	yeeU	2075136	2075504	forward	CP4-44 prophage; antitoxin of the YeeV-YeeU toxin-antitoxin system
b2005	cbtA	2075593	2075967	forward	CP4-44 prophage; toxin of the CbtA-YeeU toxin-antitoxin system
b2006	yeeW	2075964	2076158	forward	CP4-44 prophage; predicted protein
b4538	yoeF	2076599	2076955	forward	conserved protein
b2007	yeeX	2077056	2077385	reverse	conserved protein
b2008	yeeA	2077557	2078615	reverse	conserved inner membrane protein
b2009	sbmC	2078813	2079286	reverse	DNA gyrase inhibitor
b2010	dacD	2079405	2080571	reverse	DD-carboxypeptidase, penicillin-binding protein 6b
b2011	sbcB	2080780	2082207	forward	exonuclease I, 3' --> 5' specific; deoxyribophosphodiesterase
b2014	plaP	2083728	2085086	reverse	low affinity putrescine importer
b4678	yoeI	2085076	2085138	reverse	small protein
b2015	yeeY	2085353	2086282	reverse	predicted DNA-binding transcriptional regulator
b2016	yeeZ	2086328	2087152	reverse	predicted epimerase, with NAD(P)-binding Rossmann-fold domain
b4539	yoeB	2087235	2087489	reverse	toxin of the YoeB-YefM toxin-antitoxin pair
b2017	yefM	2087486	2087737	reverse	YefM antitoxin of the YoeB-YefM toxin-antitoxin pair and DNA binding transcriptional repressor
b2018	hisL	2088020	2088070	forward	his operon leader peptide
b2019	hisG	2088216	2089115	forward	HisG
b2020	hisD	2089121	2090425	forward	HisD
b2021	hisC	2090422	2091492	forward	HisC
b2022	hisB	2091492	2092559	forward
b2023	hisH	2092559	2093149	forward	imidazole glycerol phosphate synthase, HisH subunit
b2024	hisA	2093149	2093886	forward	N-(5'-phospho-L-ribosyl-formimino)-5-amino-1-(5'-phosphoribosyl)-4-imidazolecarboxamide isomerase
b2025	hisF	2093868	2094644	forward	imidazole glycerol phosphate synthase, HisF subunit
b2026	hisI	2094638	2095249	forward	phosphoribosyl-AMP cyclohydrolase/phosphoribosyl-ATP pyrophosphatase
b2027	cld	2095345	2096325	reverse	regulator of length of O-antigen component of lipopolysaccharide chains
b2030	insH-7	2099919	2100935	reverse
b2032	wbbK	2101415	2102533	reverse	predicted lipopolysaccharide biosynthesis protein
b2064	asmA	2137783	2139636	reverse	predicted assembly protein AsmA
b2065	dcd	2139658	2140239	reverse	Dcd
b2066	udk	2140331	2140972	reverse	uridine kinase/cytidine kinase
b2067	yegE	2141290	2144607	forward	predicted diguanylate cyclase
b2068	alkA	2144716	2145564	reverse	3-methyl-adenine DNA glycosylase II, inducible
b2069	yegD	2145698	2147050	forward	actin family protein
b2072	yegK	2149735	2150496	reverse	predicted protein
b2073	yegL	2150493	2151152	reverse	conserved protein
b2074	mdtA	2152040	2153287	forward	MdtA
b2075	mdtB	2153287	2156409	forward	MdtB
b2076	mdtC	2156410	2159487	forward	MdtC
b2077	mdtD	2159488	2160903	forward	YegB
b2078	baeS	2160900	2162303	forward	BaeS sensory histidine kinase
b2079	baeR	2162300	2163022	forward	BaeR transcriptional regulator
b2081	yegQ	2163692	2165053	forward	predicted peptidase
b2087	gatR_1	2167717	2168163	reverse	negative DNA-binding transcriptional regulator of galactitol metabolism
b2089	insF-5	2168556	2169422	forward
b2091	gatD	2169857	2170897	reverse	galactitol-1-phosphate dehydrogenase
b2092	gatC	2170945	2172300	reverse	GatC
b2093	gatB	2172304	2172588	reverse	GatB
b2094	gatA	2172619	2173071	reverse	GatA
b2095	gatZ	2173081	2174343	reverse
b2096	gatY	2174372	2175226	reverse	GatY
b2098	yegT	2176843	2178120	forward	YegT MFS transporter
b2099	yegU	2178117	2179121	forward	predicted hydrolase
b2100	yegV	2179118	2180083	forward	predicted kinase
b2101	yegW	2180057	2180803	reverse	predicted DNA-binding transcriptional regulator
b2102	yegX	2180855	2181673	reverse	predicted hydrolase
b2103	thiD	2181738	2182538	reverse
b2104	thiM	2182535	2183323	reverse	hydroxyethylthiazole kinase
b2105	rcnR	2183546	2183818	reverse	RcnR DNA-binding transcriptional repressor
b2106	rcnA	2183939	2184763	forward	membrane protein conferring nickel and cobalt resistance
b2112	yehE	2190537	2190818	reverse	predicted protein
b2113	mrp	2191081	2192190	reverse	putative ATPase
b2114	metG	2192322	2194355	forward	methionyl-tRNA synthetase
b2118	yehI	2198301	2201933	forward	conserved protein
b4541	yehK	2201994	2202311	forward	predicted protein
b2121	yehP	2205989	2207125	forward	conserved protein
b2122	yehQ	2207122	2208966	forward	predicted protein
b2123	yehR	2209247	2209708	forward	conserved protein
b2124	yehS	2209748	2210218	reverse	conserved protein
b2125	yehT	2210265	2210984	reverse	two-component response regulator
b2126	yehU	2210981	2212666	reverse	predicted sensory kinase in two-component system with YehT
b2127	mlrA	2212888	2213619	forward	MlrA DNA binding transcriptional activator
b4542	yohO	2213679	2213786	forward	small predicted membrane protein
b2128	yehW	2213767	2214498	reverse	YehW
b2132	bglX	2217714	2220011	reverse	&beta;-D-glucoside glucohydrolase, periplasmic
b2133	dld	2220207	2221922	forward	D-lactate dehydrogenase
b2134	pbpG	2221960	2222892	reverse	penicillin-binding protein 7
b2135	yohC	2223066	2223653	reverse	predicted inner membrane protein
b2136	yohD	2223823	2224401	forward	conserved inner membrane protein
b2138	mdtQ	2225345	2226433	reverse	putative channel/filament protein
b2139	yohH	2226571	2226708	reverse	conserved protein
b2140	dusC	2227460	2228407	reverse	tRNA dihydrouridine synthase
b2141	yohJ	2228646	2229044	forward	conserved inner membrane protein
b2142	yohK	2229041	2229736	forward	putative seritonin transporter
b2144	sanA	2230900	2231619	forward	vancomycin sensitivity
b2148	mglC	2234765	2235775	reverse	MglC
b2149	mglA	2235791	2237311	reverse	MglA
b2150	mglB	2237372	2238370	reverse	MglB
b2151	galS	2238650	2239690	reverse	GalS DNA-binding transcriptional dual regulator
b2152	yeiB	2239832	2240989	reverse	conserved inner membrane protein
b2153	folE	2241006	2241674	reverse	GTP cyclohydrolase I monomer
b2154	yeiG	2241932	2242768	forward
b2155	cirA	2242800	2244791	reverse	outer membrane receptor involved in uptake of ferric dihyroxybenzoylserine
b2157	yeiE	2246759	2247640	reverse	LYSR-type transcriptional regulator
b2158	yeiH	2247739	2248788	forward	conserved inner membrane protein
b2159	nfo	2248862	2249719	forward	endonuclease IV
b2160	yeiI	2249722	2250810	forward	predicted kinase
b2170	setB	2261885	2263066	forward	SetB MFS transporter
b4502	yeiW	2263063	2263317	reverse	conserved protein
b2171	yeiP	2263472	2264044	forward	predicted dehydrogenase, NAD-dependent
b2172	yeiQ	2264267	2265733	forward	predicted dehydrogenase, NAD-dependent
b2173	yeiR	2265851	2266837	forward	predicted enzyme
b2174	lpxT	2266876	2267589	forward	protein with low undecaprenyl pyrophosphate phosphatase activity
b2175	spr	2268001	2268567	forward	predicted peptidase, outer membrane lipoprotein
b2176	rtn	2268748	2270304	forward	putative lipoprotein
b2177	yejA	2270386	2272200	forward	YejA
b2178	yejB	2272201	2273295	forward	YejB
b2179	yejE	2273295	2274320	forward	YejE
b2180	yejF	2274322	2275911	forward	YejF
b2181	yejG	2275915	2276259	reverse	predicted protein
b2182	bcr	2276592	2277782	reverse	Bcr multidrug MFS transporter
b2183	rsuA	2277810	2278505	reverse	16S rRNA pseudouridine 516 synthase
b2184	yejH	2278654	2280414	forward	predicted ATP-dependent helicase
b2185	rplY	2280539	2280823	forward	50S ribosomal subunit protein L25
b2186	yejK	2280962	2281969	reverse	DNA-associated protein
b2187	yejL	2282151	2282378	forward	conserved protein
b2188	yejM	2282398	2284158	forward	predicted hydrolase, inner membrane
b2191	b2191	2286927	2287049	forward
b2192	insH-8	2287087	2288103	reverse
b2193	narP	2288522	2289169	forward	NarP
b2194	ccmH	2289380	2290432	reverse	CcmH
b2195	ccmG	2290429	2290986	reverse	CcmG
b2196	ccmF	2290983	2292926	reverse	cytochrome c-type biogenesis protein
b2197	ccmE	2292923	2293402	reverse	CcmE
b2198	ccmD	2293399	2293608	reverse	CcmD
b2199	ccmC	2293605	2294342	reverse	CcmC
b2200	ccmB	2294384	2295046	reverse	CcmB
b2201	ccmA	2295043	2295666	reverse	CcmA
b2202	napC	2295679	2296281	reverse	cytochrome c protein
b4604	yojO	2301628	2301792	forward	hypothetical protein
b2209	eco	2301927	2302415	forward	ecotin monomer; serine protease inhibitor
b2210	mqo	2303130	2304776	reverse	malate:quinone oxidoreductase
b2211	yojI	2304994	2306637	reverse	fused predicted multidrug transport subunits of ABC superfamily: membrane component / ATP-binding component
b2212	alkB	2306713	2307363	reverse	AlkB repair system for alkylated DNA and RNA
b2213	ada	2307363	2308427	reverse	Ada DNA-binding transcriptional dual regulator
b2214	apbE	2308501	2309556	reverse	predicted thiamine biosynthesis lipoprotein
b2215	ompC	2309668	2310771	reverse	OmpC
b2216	rcsD	2311510	2314182	forward	RcsD phosphotransferase
b2217	rcsB	2314199	2314849	forward	RcsB
b2218	rcsC	2315049	2317850	reverse	RcsC sensory histidine kinase
b2219	atoS	2318065	2319891	forward	AtoS
b2220	atoC	2319888	2321273	forward	AtoC transcriptional activator; Az protein inhibitor of ODC
b2221	atoD	2321469	2322131	forward	acetyl-CoA:acetoacetyl-CoA transferase, &alpha; subunit
b2222	atoA	2322131	2322781	forward	acetyl-CoA:acetoacetyl-CoA transferase, &beta; subunit
b2223	atoE	2322778	2324100	forward	predicted short chain fatty acid transporter
b2224	atoB	2324131	2325315	forward	AtoB
b2225	yfaP	2325389	2326165	reverse	conserved protein
b2226	yfaQ	2326170	2327819	reverse	predicted protein
b2229	yfaT	2332358	2332981	reverse	predicted protein
b2230	yfaA	2332978	2334666	reverse	predicted protein
b2231	gyrA	2334815	2337442	reverse	DNA gyrase, subunit A
b2232	ubiG	2337589	2338311	forward	UbiG
b4605	ypaB	2342616	2342759	reverse	hypothetical protein
b2234	nrdA	2342887	2345172	forward	ribonucleoside diphosphate reductase 1, &alpha; subunit
b2235	nrdB	2345406	2346536	forward	ribonucleoside diphosphate reductase 1, &beta; subunit, ferritin-like
b2236	yfaE	2346536	2346790	forward	2Fe-2S cluster-containing protein involved in diferric-tyrosyl radical cofactor maintenance
b2237	inaA	2346844	2347494	reverse	pH-inducible protein involved in stress response
b2238	yfaH	2347709	2347915	forward	conserved protein
b2244	yfaD	2354926	2355825	forward	conserved protein
b2245	yfaU	2356064	2356867	reverse	2-keto-3-deoxy-L-rhamnonate aldolase
b2246	yfaV	2356885	2358174	reverse	predicted transporter
b2247	yfaW	2358231	2359448	reverse	L-rhamnonate dehydratase
b2248	yfaX	2359451	2360233	reverse	predicted DNA-binding transcriptional regulator
b2249	yfaY	2360453	2361655	reverse	conserved protein
b2250	yfaZ	2361755	2362297	reverse	outer membrane protein
b4544	arnE	2370579	2370914	forward	ArnE
b2258	arnF	2370914	2371300	forward	ArnF
b2259	pmrD	2371294	2371560	reverse	polymyxin B resistance protein
b2260	menE	2371670	2373025	reverse	MenE
b2261	menC	2373022	2373984	reverse	<i>o</i>-succinylbenzoate synthase
b2262	menB	2373984	2374841	reverse
b2263	menH	2374856	2375614	reverse	(1R,6R)-2-succinyl-6-hydroxy-2,4-cyclohexadiene-1-carboxylate synthase
b2264	menD	2375611	2377281	reverse
b2265	menF	2377370	2378665	reverse	MenF
b2267	elaA	2379104	2379565	reverse	predicted acyltransferase with acyl-CoA N-acyltransferase domain
b2275	yfbP	2387135	2387986	forward	predicted protein
b2276	nuoN	2388070	2389527	reverse	NADH:ubiquinone oxidoreductase, membrane subunit N
b2277	nuoM	2389534	2391063	reverse	NADH:ubiquinone oxidoreductase, membrane subunit M
b2278	nuoL	2391227	2393068	reverse	NADH:ubiquinone oxidoreductase, membrane subunit L
b2279	nuoK	2393065	2393367	reverse	NADH:ubiquinone oxidoreductase, membrane subunit K
b2280	nuoJ	2393364	2393918	reverse	NADH:ubiquinone oxidoreductase, membrane subunit J
b2281	nuoI	2393930	2394472	reverse	NADH:ubiquinone oxidoreductase, chain I
b2282	nuoH	2394487	2395464	reverse	NADH:ubiquinone oxidoreductase, membrane subunit H
b2283	nuoG	2395461	2398187	reverse	NADH:ubiquinone oxidoreductase, chain G
b2284	nuoF	2398240	2399577	reverse	NADH:ubiquinone oxidoreductase, chain F
b2285	nuoE	2399574	2400074	reverse	NADH:ubiquinone oxidoreductase, chain E
b2286	nuoC	2400077	2401867	reverse	NADH:ubiquinone oxidoreductase, chain CD
b2287	nuoB	2401973	2402635	reverse	NADH:ubiquinone oxidoreductase, chain B
b2288	nuoA	2402651	2403094	reverse	NADH:ubiquinone oxidoreductase, membrane subunit A
b2289	lrhA	2403725	2404663	reverse	LrhA DNA-binding transcriptional dual regulator
b2290	alaA	2405583	2406800	forward	glutamate-pyruvate aminotransferase
b2291	yfbR	2406884	2407483	forward	dCMP phosphohydrolase
b2292	yfbS	2407542	2409374	reverse	putative transport protein
b2293	yfbT	2409461	2410111	reverse	sugar phosphatase
b2294	yfbU	2410122	2410616	reverse	conserved protein
b2295	yfbV	2410699	2411154	reverse	conserved inner membrane protein
b2296	ackA	2411492	2412694	forward	acetate kinase/propionate kinase
b2297	pta	2412769	2414913	forward	Pta
b2298	yfcC	2415103	2416623	forward	predicted inner membrane protein; putative S-transferase
b2299	yfcD	2416656	2417198	reverse	predicted Nudix hydrolase
b2300	yfcE	2417256	2417810	reverse	phosphodiesterase
b2301	yfcF	2417863	2418507	reverse	glutathione S-transferase
b2303	folX	2419347	2419709	forward	dihydroneopterin triphosphate 2'-epimerase monomer
b2304	yfcH	2419730	2420623	forward	conserved protein with NAD(P)-binding Rossmann-fold domain
b2305	yfcI	2420671	2421561	reverse	conserved protein
b2306	hisP	2421758	2422531	reverse	HisP
b2307	hisM	2422539	2423255	reverse	HisM
b2308	hisQ	2423252	2423938	reverse	HisQ
b2309	hisJ	2424028	2424810	reverse	HisJ
b2310	argT	2425031	2425813	reverse	ArgT
b2311	ubiX	2426079	2426648	reverse	3-octaprenyl-4-hydroxybenzoate decarboxylase together with UbiG
b2312	purF	2426743	2428260	reverse	PurF
b2313	cvpA	2428297	2428785	reverse	membrane protein required for colicin V production
b2314	dedD	2429044	2429706	reverse	cell division protein DedD
b2315	folC	2429696	2430964	reverse	bifunctional folypolyglutamate synthetase / dihydrofolate synthetase
b2316	accD	2431034	2431948	reverse	acetyl-CoA carboxyltransferase, &beta; subunit
b2317	dedA	2432104	2432763	reverse	conserved inner membrane protein
b2318	truA	2432846	2433658	reverse	tRNA pseudouridine synthase I
b2319	usg	2433658	2434671	reverse	predicted semialdehyde dehydrogenase
b2320	pdxB	2434737	2435873	reverse	erythronate-4-phosphate dehydrogenase
b2321	flk	2435972	2436967	forward	predicted flagella assembly protein
b2322	yfcJ	2436964	2438142	reverse	YfcJ MFS transporter
b2323	fabB	2438407	2439627	reverse	FabB
b2324	mnmC	2439786	2441792	forward	fused 5-methylaminomethyl-2-thiouridine-forming methyltransferase and FAD-dependent demodification enzyme
b2325	yfcL	2441913	2442191	reverse	predicted protein
b2326	yfcM	2442225	2442773	reverse	putative transporting ATPase
b2327	yfcA	2442773	2443582	reverse	conserved inner membrane structural protein
b2328	mepA	2443582	2444406	reverse	MepA
b2329	aroC	2444410	2445495	reverse	AroC
b2330	prmB	2445530	2446462	reverse	N5-glutamine methyltransferase
b2331	yfcN	2446628	2447179	forward	conserved protein
b2332	yfcO	2447250	2448071	reverse	predicted protein
b2333	yfcP	2448073	2448612	reverse	predicted fimbrial-like adhesin protein
b2334	yfcQ	2448609	2449097	reverse	predicted fimbrial-like adhesin protein
b2335	yfcR	2449094	2449606	reverse	predicted fimbrial-like adhesin protein
b2336	yfcS	2449606	2450358	reverse	predicted periplasmic pilus chaperone
b2337	yfcT	2450378	2451274	reverse	fimbrial usher protein, C-terminal fragment
b2340	sixA	2454349	2454834	reverse	phosphohistidine phosphatase
b2341	fadJ	2455037	2457181	reverse	FadJ monomer
b2342	fadI	2457181	2458491	reverse	FadI monomer
b2343	yfcZ	2458672	2458956	reverse	conserved protein
b2346	mlaA	2462274	2463029	reverse	MlaA
b2347	yfdC	2463323	2464255	forward	predicted inner membrane protein
b2349	intS	2464567	2465724	forward	CPS-53 (KpLE1) prophage; prophage CPS-53 integrase
b2350	yfdG	2465877	2466239	forward	CPS-53 (KpLE1) prophage; predicted bactoprenol-linked glucose translocase (flippase)
b2354	yfdK	2469099	2469539	reverse	CPS-53 (KpLE1) prophage; conserved protein
b2355	yfdL	2469566	2470084	reverse	CPS-53 (KpLE1) prophage; conserved protein
b2356	yfdM	2470134	2470409	reverse	CPS-53 (KpLE1) prophage; predicted methyltransferase
b2357	yfdN	2470409	2470903	reverse	CPS-53 (KpLE1) prophage; predicted protein
b2358	yfdO	2470900	2471268	reverse	CPS-53 (KpLE1) prophage; predicted defective phage replication protein O
b2359	yfdP	2471542	2471988	forward	CPS-53 (KpLE1) prophage; predicted protein
b2361	yfdR	2473006	2473542	forward	CPS-53 (KpLE1) prophage; deoxyribonucleoside 5'-monophosphate phosphatase
b2362	yfdS	2473533	2473895	forward	CPS-53 (KpLE1) prophage; predicted protein
b2363	yfdT	2473895	2474200	forward	CPS-53 (KpLE1) prophage; predicted protein
b4545	ypdJ	2474116	2474256	forward	predicted protein
b4501	torI	2474332	2474532	forward	prophage excisionase and response regulator inhibitor
b2364	dsdC	2474716	2475651	reverse	DsdC DNA-binding transcriptional dual regulator
b2365	dsdX	2475869	2477206	forward	DsdX Gnt tranporter
b2366	dsdA	2477224	2478552	forward	D-serine deaminase
b2376	ypdI	2492720	2492995	forward	YpdI colanic acid synthesis lipoprotein
b2377	yfdY	2493072	2493314	reverse	predicted inner membrane protein
b2378	lpxP	2493667	2494587	forward	palmitoleoyl acyltransferase
b4680	ypdK	2494943	2495014	forward	small membrane protein
b2379	alaC	2495079	2496317	reverse	glutamate-pyruvate aminotransferase
b2380	ypdA	2496693	2498390	forward	predicted sensory kinase in two-component system with YpdB
b2381	ypdB	2498405	2499139	forward	predicted response regulator in two-component system with YpdA
b2382	ypdC	2499152	2500009	forward	predicted ARAC-type regulatory protein
b2383	fryA	2500012	2502507	reverse	fused predicted PTS system enzymes: Hpr component, enzyme I component, enzyme IIA component
b2384	ypdE	2502532	2503569	reverse	broad-specificity examinopeptidase
b2385	ypdF	2503569	2504654	reverse	aminopeptidase
b2386	fryC	2504669	2505916	reverse	predicted enzyme IIC component of PTS
b2387	fryB	2505938	2506264	reverse	predicted enzyme IIB component of PTS
b2388	glk	2506483	2507448	reverse	glucokinase
b2390	ypeC	2509023	2509349	forward	conserved protein
b2392	mntH	2509490	2510728	reverse	MntH manganese ion NRAMP transporter
b2393	nupC	2511064	2512266	forward	NupC nucleoside NUP transporter
b2395	yfeA	2513665	2515854	reverse	predicted diguanylate cyclase
b2398	yfeC	2516489	2516833	forward	predicted DNA-binding transcriptional regulator
b2399	yfeD	2516835	2517227	forward	predicted DNA-binding transcriptional regulator
b2400	gltX	2517279	2518694	reverse	glutamyl-tRNA synthetase
b2406	xapB	2520751	2522007	reverse	XapB xanthosine MFS transporter
b2407	xapA	2522067	2522900	reverse	XapA
b2408	yfeN	2523149	2523913	forward	conserved outer membrane protein
b2409	yfeR	2523952	2524878	reverse	predicted DNA-binding transcriptional regulator, LYSR-type
b2410	yfeH	2524968	2525966	forward	putative cytochrome oxidase
b4546	ypeB	2525963	2526181	reverse	predicted protein
b2411	ligA	2526183	2528198	reverse	DNA ligase
b2412	zipA	2528269	2529255	reverse	essential cell division protein ZipA
b2413	cysZ	2529485	2530246	forward	predicted inner membrane protein
b2415	ptsH	2531786	2532043	forward	HPr
b2416	ptsI	2532088	2533815	forward	PTS enzyme I
b2417	crr	2533856	2534365	forward	Crr
b2418	pdxK	2534408	2535259	reverse	PdxK
b2420	yfeS	2535771	2536505	forward	conserved protein
b2421	cysM	2536694	2537605	reverse	CysM
b2426	ucpA	2541854	2542645	reverse	predicted oxidoreductase, sulfate metabolism protein
b2427	murR	2542774	2543631	reverse	MurR
b2428	murQ	2543795	2544691	forward	<i>N</i>-acetylmuramic acid 6-phosphate etherase
b2429	murP	2544695	2546119	forward
b2430	yfeW	2546124	2547428	forward	penicillin binding protein 4B
b2431	yfeX	2547668	2548567	reverse	heme iron acquisition protein
b2432	yfeY	2548663	2549238	reverse	predicted outer membrane lipoprotein
b2433	yfeZ	2549299	2549748	reverse	predicted inner membrane protein
b2434	ypeA	2549735	2550160	reverse	predicted acyltransferase with acyl-CoA N-acyltransferase domain
b2435	amiA	2550374	2551243	forward	N-acetylmuramoyl-L-alanine amidase 1
b2436	hemF	2551247	2552146	forward	coproporphyrinogen III oxidase
b2437	eutR	2552152	2553204	reverse	putative ARAC-type regulatory protein
b2438	eutK	2553250	2553750	reverse	predicted structural protein, ethanolamine utilization microcompartment
b2439	eutL	2553763	2554422	reverse	predicted structural protein, ethanolamine utilization microcompartment
b2440	eutC	2554432	2555319	reverse	ethanolamine ammonia-lyase, &beta; subunit
b2441	eutB	2555340	2556701	reverse	ethanolamine ammonia-lyase, &alpha; subunit
b2442	intZ	2556793	2558088	forward	CPZ-55 prophage; predicted integrase
b2443	yffL	2558279	2558920	forward	CPZ-55 prophage; predicted protein
b2444	yffM	2559390	2559635	forward	CPZ-55 prophage; predicted protein
b2445	yffN	2559632	2560015	forward	CPZ-55 prophage; predicted protein
b2446	yffO	2560133	2560549	forward	CPZ-55 prophage; predicted protein
b2447	yffP	2560546	2561139	forward	CPZ-55 prophage; predicted protein
b2448	yffQ	2561599	2561991	forward	CPZ-55 prophage; predicted protein
b2449	yffR	2562002	2562394	forward	CPZ-55 prophage; predicted protein
b2450	yffS	2562515	2563354	forward	CPZ-55 prophage; predicted protein
b2451	eutA	2563503	2564906	reverse	reactivating factor for ethanolamine ammonia-lyase EutBC
b2452	eutH	2564903	2566129	reverse	predicted inner membrane protein
b2453	eutG	2566346	2567533	reverse	predicted alcohol dehydrogenase in ethanolamine utilization
b2454	eutJ	2567523	2568359	reverse	predicted chaperonin, ethanolamine utilization protein
b2455	eutE	2568370	2569773	reverse	predicted aldehyde dehydrogenase, ethanolamine utilization protein
b2456	eutN	2569785	2570072	reverse	predicted carboxysome structural protein
b2457	eutM	2570179	2570472	reverse	predicted structural protein, ethanolamine utilization microcompartment
b2458	eutD	2570511	2571527	reverse	phosphate acetyltransferase monomer
b2459	eutT	2571524	2572327	reverse	predicted cobalamine adenosyltransferase in ethanolamine utilization
b2460	eutQ	2572324	2573025	reverse	conserved protein
b2461	eutP	2573000	2573479	reverse	conserved protein with nucleoside triphosphate hydrolase domain
b2462	eutS	2573492	2573827	reverse	predicted structural protein, ethanolamine utilization microcompartment
b2463	maeB	2574120	2576399	reverse	MaeB
b2464	talA	2576688	2577638	forward	transaldolase A
b2466	ypfG	2579756	2580799	reverse	predicted protein
b2467	nudK	2580925	2581500	reverse	nucleotide-sugar hydrolase
b2468	aegA	2581568	2583547	reverse	putative oxidoreductase, Fe-S subunit
b2469	narQ	2583753	2585453	forward	NarQ
b2470	acrD	2585617	2588730	forward	AcrD
b4606	ypfM	2588829	2588888	reverse	small protein
b2471	yffB	2589269	2589625	forward	conserved protein
b2472	dapE	2589629	2590756	forward	<i>N</i>-succinyl-L-diaminopimelate desuccinylase subunit
b4547	ypfN	2590784	2590984	forward	predicted protein
b2473	ypfH	2591094	2591792	reverse	esterase
b2474	tmcA	2591866	2593881	reverse	tRNA<sup>Met</sup> cytidine acetyltransferase
b2475	ypfJ	2593896	2594759	reverse	conserved protein
b2476	purC	2594927	2595640	reverse	PurC
b2477	bamC	2595853	2596887	reverse	BamC
b2478	dapA	2596904	2597782	reverse	DapA
b2479	gcvR	2597928	2598500	forward	GcvR predicted transcriptional regulator
b2480	bcp	2598500	2598970	forward	thiol peroxidase
b2481	hyfA	2599223	2599840	forward	hydrogenase 4, component A
b2482	hyfB	2599840	2601858	forward	hydrogenase 4, component B
b2483	hyfC	2601869	2602816	forward	hydrogenase 4, component C
b2484	hyfD	2602833	2604272	forward	hydrogenase 4, component D
b2485	hyfE	2604284	2604934	forward	hydrogenase 4, component E
b2486	hyfF	2604939	2606519	forward	hydrogenase 4, component F
b2487	hyfG	2606509	2608176	forward	hydrogenase 4, large subunit
b2488	hyfH	2608186	2608731	forward	hydrogenase 4, component H
b2489	hyfI	2608728	2609486	forward	hydrogenase 4, small subunit
b2490	hyfJ	2609479	2609892	forward	hydrogenase 4 component J, putative protein processing element
b2491	hyfR	2609922	2611934	forward	HyfR DNA-binding transcriptional activator
b2492	focB	2611956	2612804	forward	FocB formate FNT transporter
b2493	yfgO	2612842	2613903	reverse	predicted inner membrane protein
b2494	yfgC	2614116	2615579	forward	predicted peptidase
b2495	yfgD	2615600	2615959	forward	predicted oxidoreductase
b2496	hda	2616097	2616798	reverse	regulator of DnaA that prevents premature reinitiation of DNA replication
b2497	uraA	2616893	2618182	reverse	uracil NCS2 transporter
b2498	upp	2618268	2618894	reverse	Upp
b2499	purM	2619219	2620256	forward	PurM
b2500	purN	2620256	2620894	forward	phosphoribosylglycinamide formyltransferase 1
b2501	ppk	2621066	2623132	forward	Ppk
b2502	ppx	2623137	2624678	forward	exopolyphosphatase monomer
b2504	yfgG	2627312	2627503	forward	predicted protein
b2507	guaA	2628980	2630557	reverse	GMP synthetase
b2508	guaB	2630626	2632092	reverse	GuaB
b2509	xseA	2632254	2633624	forward	exonuclease VII, large subunit
b2510	yfgJ	2633621	2633836	reverse	predicted protein
b2511	der	2633906	2635378	reverse	50S ribosomal subunit stability factor
b2512	bamB	2635496	2636674	reverse	BamB
b2513	yfgM	2636685	2637305	reverse	conserved protein
b2514	hisS	2637323	2638597	reverse	histidyl-tRNA synthetase
b2515	ispG	2638708	2639826	reverse	1-hydroxy-2-methyl-2-(E)-butenyl 4-diphosphate synthase
b2516	rodZ	2639853	2640866	reverse	transmembrane component of cytoskeleton
b2517	rlmN	2641151	2642305	reverse	23S rRNA m<sup>2</sup>A2503 methyltransferase
b2518	ndk	2642455	2642886	reverse	Ndk
b2519	pbpC	2643035	2645347	reverse	peptidoglycan glycosyltransferase
b2520	yfhM	2645348	2650309	reverse	&alpha;-macroglobulin
b2521	sseA	2650516	2651361	forward	3-mercaptopyruvate:cyanide sulfurtransferase
b2522	sseB	2652179	2652955	reverse	overproduction causes enhanced serine sensitivity
b2523	pepB	2653097	2654380	reverse	aminopeptidase B
b2524	iscX	2654558	2654758	reverse	protein with possible role in iron-sulfur cluster biogenesis
b2525	fdx	2654770	2655105	reverse	reduced ferredoxin
b2526	hscA	2655107	2656957	reverse	chaperone, member of Hsp70 protein family
b2527	hscB	2656974	2657489	reverse	Hsc20 co-chaperone that acts with Hsc66 in IscU iron-sulfur cluster assembly
b2528	iscA	2657585	2657908	reverse	iron-sulfur cluster assembly protein
b2529	iscU	2657925	2658311	reverse	scaffold protein involved in iron-sulfur cluster assembly
b2530	iscS	2658339	2659553	reverse	cysteine desulfurase monomer
b2531	iscR	2659665	2660153	reverse	IscR DNA-binding transcriptional dual regulator
b2532	trmJ	2660605	2661345	reverse	tRNA Cm32/Um32 methyltransferase
b2533	suhB	2661464	2662267	forward	inositol monophosphatase
b2534	yfhR	2662385	2663266	forward	predicted peptidase
b2535	csiE	2663457	2664737	forward	stationary phase inducible protein
b2536	hcaT	2664729	2665868	reverse	HcaT MFS transporter
b2537	hcaR	2666028	2666918	reverse	HcaR transcriptional dual regulator
b2538	hcaE	2667054	2668415	forward	3-phenylpropionate dioxygenase, &alpha; subunit
b2539	hcaF	2668412	2668930	forward	3-phenylpropionate dioxygenase, &beta; subunit
b2540	hcaC	2668930	2669250	forward	3-phenylpropionate dioxygenase, predicted ferredoxin subunit
b2541	hcaB	2669247	2670059	forward	3-(<i>cis</i>-5,6-dihydroxycyclohexa-1,3-dien-1-yl)propanoate dehydrogenase
b2542	hcaD	2670069	2671271	forward	ferredoxin NAD+ reductase
b2544	yphB	2671838	2672710	reverse	conserved protein
b2545	yphC	2672722	2673783	reverse	predicted oxidoreductase, Zn-dependent and NAD(P)-binding
b2546	yphD	2673849	2674847	reverse	YphD
b2549	yphG	2677486	2680767	reverse	conserved protein
b2550	yphH	2680885	2682078	forward	predicted DNA-binding transcriptional regulator, NAGC-like
b2551	glyA	2682276	2683529	reverse	GlyA
b2553	glnB	2685092	2685430	reverse	PII
b2554	glrR	2685491	2686825	reverse	GlrR DNA-binding transcriptional activator
b2555	yfhG	2686815	2687528	reverse	conserved protein
b2556	glrK	2687693	2689120	reverse	GlrK sensory histidine kinase
b2557	purL	2689678	2693565	reverse	phosphoribosylformylglycinamide synthetase
b2558	mltF	2693823	2695379	forward	membrane-bound lytic murein transglycosylase F
b2559	tadA	2695376	2695879	reverse	tRNA-specific adenosine deaminase monomer
b2560	pgpC	2695937	2696572	reverse	phosphatidylglycerophosphatase C
b2561	yfhH	2696781	2697629	forward	predicted DNA-binding transcriptional regulator
b2562	yfhL	2697685	2697945	forward	predicted 4Fe-4S cluster-containing protein
b2563	acpS	2698640	2699020	reverse	AcpS
b2564	pdxJ	2699020	2699751	reverse	PdxJ
b2565	recO	2699763	2700491	reverse	protein interacts with RecR and possibly RecF proteins
b2566	era	2700503	2701408	reverse	GTP-binding protein
b2567	rnc	2701405	2702085	reverse	RNase III
b2568	lepB	2702357	2703331	reverse	leader peptidase (signal peptidase I)
b2569	lepA	2703347	2705146	reverse	elongation factor 4
b2570	rseC	2705344	2705823	reverse	SoxR and Sigma-E factor regulatory protein RseC
b2571	rseB	2705820	2706776	reverse	rseB
b2574	nadB	2708442	2710064	forward	L-aspartate oxidase
b2575	yfiC	2710049	2710786	reverse	tRNA m<sup>6</sup>A37 methyltransferase
b2576	srmB	2710918	2712252	forward	SrmB, DEAD-box RNA helicase
b2577	yfiE	2712461	2713342	reverse	predicted DNA-binding transcriptional regulator LYSR-type
b2578	eamB	2713445	2714032	forward	O-Acetylserine/Cysteine Efflux Permease
b2580	ung	2714776	2715465	forward	uracil-DNA glycosylase
b2581	yfiF	2715513	2716550	reverse	predicted methyltransferase
b2582	trxC	2716757	2717176	forward	reduced thioredoxin 2
b2583	yfiP	2717245	2717943	forward	conserved protein
b2584	yfiQ	2717975	2720635	forward	peptidyl-lysine acetyltransferase
b2585	pssA	2720749	2722104	forward	PssA
b2586	yfiM	2722201	2722473	forward	predicted protein
b2587	kgtP	2722470	2723768	reverse	KgtP &alpha;-ketoglutarate MFS transporter
b2592	clpB	2729622	2732195	reverse	ClpB chaperone
b2593	yfiH	2732325	2733056	reverse	conserved protein
b2594	rluD	2733053	2734033	reverse	23S rRNA pseudouridine synthase
b2595	bamD	2734168	2734905	forward	BamD
b2597	raiA	2735176	2735517	forward	stationary phase translation inhibitor and ribosome stability factor
b2598	pheL	2735621	2735668	forward	leader peptide of chorismate mutase-P-prephenate dehydratase
b2599	pheA	2735767	2736927	forward	PheA
b2600	tyrA	2736970	2738091	reverse	TyrA
b2603	yfiR	2739897	2740415	forward	predicted periplasmic protein involved in swarming motility
b2606	rplS	2742205	2742552	reverse	50S ribosomal subunit protein L19
b2607	trmD	2742594	2743361	reverse	TrmD
b2608	rimM	2743392	2743940	reverse	ribosome maturation protein
b2609	rpsP	2743959	2744207	reverse	30S ribosomal subunit protein S16
b2610	ffh	2744456	2745817	reverse	protein component of the signal recognition particle (SRP)
b2611	ypjD	2745909	2746775	forward	predicted inner membrane protein
b4461	yfjD	2746886	2748082	forward	predicted inner membrane protein
b2614	grpE	2748137	2748730	reverse	phage lambda replication; host DNA synthesis; heat shock protein; protein repair
b2615	nadK	2748853	2749731	forward	NAD kinase monomer
b2616	recN	2749817	2751478	forward	protein used in recombination and DNA repair
b2617	bamE	2751627	2751968	forward	BamE
b2618	ratB	2752030	2752320	reverse	predicted protein
b2619	ratA	2752310	2752786	reverse	50S ribosomal subunit-binding toxin of a predicted toxin-antitoxin pair
b2620	smpB	2752918	2753400	forward	small protein B
b2622	intA	2754181	2755422	forward	CP4-57 prophage; integrase
b2624	alpA	2756666	2756878	forward	AlpA DNA-binding transcriptional activator; CP4-57 prophage
b2627	yfjK	2759373	2761562	reverse	CP4-57 prophage; conserved protein
b2628	yfjL	2761559	2763175	reverse	CP4-57 prophage; predicted protein
b2629	yfjM	2763535	2763798	reverse	CP4-57 prophage; predicted protein
b2630	rnlA	2763940	2765013	forward	CP4-57 prophage; RNase LS
b2631	rnlB	2765006	2765377	forward	CP4-57 prophage; antitoxin of the RnlA-RnlB toxin-antitoxin system
b2632	yfjP	2765732	2766595	forward	CP4-57 prophage; predicted GTP-binding protein
b2633	yfjQ	2766687	2767508	forward	CP4-57 prophage; predicted protein
b2634	yfjR	2767725	2768426	forward	CP4-57 prophage; predicted DNA-binding transcriptional regulator
b2635	ypjK	2768467	2768703	forward	CP4-57 prophage; predicted inner membrane protein
b2636	yfjS	2768703	2769146	forward	CP4-57 prophage; inner membrane lipoprotein YfjS
b2637	yfjT	2769170	2769637	forward	CP4-57 prophage; predicted protein
b2638	yfjU	2769862	2770176	reverse	CP4-57 prophage; conserved protein
b2639	ypjM_3	2770189	2770707	reverse	CP4-57 prophage; predicted inner membrane protein
b2640	ypjM_2	2770858	2771058	reverse	CP4-57 prophage; predicted protein
b2643	yfjX	2773941	2774399	forward	CP4-57 prophage; predicted antirestriction protein
b2644	yfjY	2774408	2774890	forward	CP4-57 prophage; predicted DNA repair protein
b4548	ypjJ	2774899	2775099	forward	CP4-57 prophage; predicted protein
b2645	yfjZ	2775137	2775454	forward	CP4-57 prophage; predicted antitoxin of the YpjF-YfjZ toxin-antitoxin system
b2646	ypjF	2775475	2775804	forward	CP4-57 prophage; toxin of the YpjF-YfjZ toxin-antitoxin system
b2658	ygaQ_4	2786399	2786671	forward	conserved protein
b2659	csiD	2787007	2787984	forward	predicted protein
b2663	gabP	2792275	2793675	forward	GabP APC transporter
b2664	csiR	2793696	2794358	forward	CsiR DNA-binding transcriptional repressor
b2666	yqaE	2794892	2795050	reverse	predicted membrane protein
b2667	ygaV	2795233	2795532	forward	predicted DNA-binding transcriptional regulator
b2670	alaE	2797186	2797635	forward	L-alanine exporter
b2671	ygaC	2797672	2798016	reverse	predicted protein
b2673	nrdH	2798745	2798990	forward	glutaredoxin-like protein
b2674	nrdI	2798987	2799397	forward	flavodoxin involved in dimanganese-tyrosyl radical cofactor maintenance for ribonucleotide reductase
b2675	nrdE	2799370	2801514	forward	NrdE
b2676	nrdF	2801524	2802483	forward	NrdF
b2680	ygaX	2806338	2806604	forward	predicted transporter
b2681	ygaY	2806634	2807515	forward	predicted transporter
b2682	ygaZ	2807639	2808376	forward	YgaZ L-valine LIV-E exporter
b2683	ygaH	2808366	2808701	forward	YgaH L-valine exporter
b2684	mprA	2808792	2809322	forward	MprA
b2685	emrA	2809449	2810621	forward	EmrA Membrane Fusion Protein
b2686	emrB	2810638	2812176	forward	EmrB multidrug MFS transporter
b2688	gshA	2812905	2814461	reverse	&gamma;-glutamate-cysteine ligase
b2689	yqaA	2814534	2814962	reverse	conserved inner membrane protein
b2690	yqaB	2814959	2815525	reverse	fructose-1-phosphatase
b2696	csrA	2816983	2817168	reverse	carbon storage regulator; pleiotropic regulatory protein for carbon source metabolism
b2697	alaS	2817403	2820033	reverse	alanyl-tRNA synthetase
b2698	recX	2820161	2820661	reverse	inhibitor of RecA
b2699	recA	2820730	2821791	reverse	DNA strand exchange and recombination protein with protease and nuclease activity
b2700	ygaD	2821871	2822368	reverse	conserved protein
b2701	mltB	2822513	2823598	reverse	membrane-bound lytic murein transglycosylase B
b2702	srlA	2823854	2824417	forward	glucitol/sorbitol-specific enzyme IIC component of PTS
b2704	srlB	2825384	2825755	forward	glucitol/sorbitol-specific enzyme IIA component of PTS
[truncated: 1,282 more rows]
